# Supplementary material
Source: PubMed Central journal article supplement (PMC9492804)
Supplement: NIHMS1791440-supplement-tS1.pdf [file NIHMS1791440-supplement-tS1.pdf]

Table 1. Top 25 Differentially Expressed Genes by Cluster

Cluster 0 - Endothelial

|          | p_val     | avg_logFC | pct.1 | pct.2 | p_val_adj |
|----------|-----------|-----------|-------|-------|-----------|
| Tmsb4x   | 0         | 0.802998  | 1     | 0.957 | 0         |
| Fabp4    | 0         | 0.802301  | 1     | 0.811 | 0         |
| Timp4    | 1.07E-306 | 0.673811  | 0.965 | 0.587 | 1.92E-302 |
| Gpihbp1  | 1.57E-289 | 0.588267  | 0.989 | 0.646 | 2.81E-285 |
| Ybx1     | 4.78E-285 | 0.511519  | 0.99  | 0.859 | 8.54E-281 |
| Gng11    | 1.93E-264 | 0.545281  | 0.978 | 0.755 | 3.45E-260 |
| Sptbn1   | 2.02E-261 | 0.483296  | 0.991 | 0.822 | 3.61E-257 |
| C1qtnf9  | 2.56E-260 | 0.493523  | 0.909 | 0.49  | 4.57E-256 |
| Tspan13  | 1.68E-244 | 0.482722  | 0.979 | 0.627 | 3.00E-240 |
| Cavin2   | 3.27E-225 | 0.468367  | 0.977 | 0.69  | 5.84E-221 |
| Smco4    | 1.13E-224 | 0.455126  | 0.749 | 0.361 | 2.01E-220 |
| Egfl7    | 9.30E-220 | 0.461143  | 0.992 | 0.684 | 1.66E-215 |
| Rflnb    | 7.90E-214 | 0.467164  | 0.773 | 0.38  | 1.41E-209 |
| Aqp1     | 7.47E-202 | 0.501286  | 0.997 | 0.705 | 1.33E-197 |
| Rgcc     | 2.59E-200 | 0.444997  | 0.951 | 0.598 | 4.63E-196 |
| Ctnnbip1 | 9.24E-199 | 0.395303  | 0.756 | 0.38  | 1.65E-194 |
| Cav1     | 5.17E-189 | 0.403003  | 0.994 | 0.773 | 9.25E-185 |
| Fabp5    | 8.38E-189 | 0.513732  | 0.853 | 0.502 | 1.50E-184 |
| Ppp1r2   | 8.01E-188 | 0.400319  | 0.908 | 0.586 | 1.43E-183 |
| 2810025M | 4.40E-185 | 0.359433  | 0.661 | 0.305 | 7.86E-181 |
| AW112010 | 1.10E-179 | 0.437576  | 0.875 | 0.517 | 1.96E-175 |
| Cav2     | 4.89E-178 | 0.37775   | 0.878 | 0.521 | 8.74E-174 |
| Ccdc85b  | 3.90E-176 | 0.362023  | 0.796 | 0.444 | 6.98E-172 |
| Ctla2a   | 1.00E-175 | 0.412702  | 0.789 | 0.402 | 1.79E-171 |
| Cavin1   | 2.07E-171 | 0.383458  | 0.971 | 0.739 | 3.70E-167 |

Cluster 1 - Endothelial

|         | p_val     | avg_logFC | pct.1 | pct.2 | p_val_adj |
|---------|-----------|-----------|-------|-------|-----------|
| Aqp1    | 0         | 0.774871  | 0.996 | 0.713 | 0         |
| Tpt1    | 0         | -0.75154  | 0.993 | 0.994 | 0         |
| Fth1    | 0         | -0.86494  | 0.939 | 0.986 | 0         |
| Cd36    | 3.05E-300 | 0.668966  | 0.995 | 0.756 | 5.44E-296 |
| mt-Co2  | 1.87E-273 | 0.459149  | 0.999 | 0.989 | 3.35E-269 |
| Rps24   | 4.41E-269 | -0.6361   | 0.95  | 0.978 | 7.89E-265 |
| Kdr     | 5.64E-247 | 0.621187  | 0.924 | 0.603 | 1.01E-242 |
| Rplp1   | 8.61E-243 | -0.53844  | 0.94  | 0.983 | 1.54E-238 |
| Rps3a1  | 1.91E-242 | -0.59588  | 0.829 | 0.955 | 3.42E-238 |
| Cdh5    | 3.68E-239 | 0.557867  | 0.975 | 0.679 | 6.59E-235 |
| Rps8    | 7.55E-227 | -0.57561  | 0.9   | 0.97  | 1.35E-222 |
| Rpl13   | 3.31E-223 | -0.53955  | 0.945 | 0.973 | 5.92E-219 |
| Gm28438 | 5.21E-219 | 0.273871  | 1     | 1     | 9.31E-215 |
| Rpl23   | 1.91E-218 | -0.60004  | 0.906 | 0.966 | 3.42E-214 |
| Rps2    | 1.15E-216 | -0.62286  | 0.728 | 0.923 | 2.06E-212 |
| Rps4x   | 3.06E-215 | -0.62502  | 0.829 | 0.945 | 5.48E-211 |
| Jund    | 5.06E-212 | -0.99481  | 0.479 | 0.776 | 9.05E-208 |
| Rpl9    | 2.10E-203 | -0.50452  | 0.931 | 0.974 | 3.76E-199 |
| Eef1a1  | 3.02E-201 | -0.56909  | 0.956 | 0.958 | 5.39E-197 |
| Rpl32   | 3.42E-196 | -0.53008  | 0.844 | 0.946 | 6.11E-192 |
| mt-Atp8 | 4.28E-193 | 0.410064  | 0.991 | 0.942 | 7.65E-189 |
| Rplp0   | 4.34E-193 | -0.58752  | 0.706 | 0.904 | 7.76E-189 |
| Junb    | 1.48E-191 | -1.24151  | 0.226 | 0.599 | 2.65E-187 |
| Rpl30   | 7.17E-191 | -0.52822  | 0.803 | 0.935 | 1.28E-186 |
| Afdn    | 3.92E-190 | 0.509225  | 0.889 | 0.596 | 7.01E-186 |

## Cluster 2 - Endothelial

|          | p_val     | avg_logFC | pct.1 | pct.2 | p_val_adj |
|----------|-----------|-----------|-------|-------|-----------|
| Hspa1a   | 0         | 1.2632    | 0.948 | 0.463 | 0         |
| Hspa1b   | 0         | 1.150488  | 0.939 | 0.444 | 0         |
| Klf2     | 0         | 1.042731  | 0.984 | 0.702 | 0         |
| Hspb1    | 0         | 1.00957   | 0.987 | 0.762 | 0         |
| Jun      | 0         | 0.863289  | 0.964 | 0.556 | 0         |
| Zfp36    | 0         | 0.833423  | 0.858 | 0.343 | 0         |
| Junb     | 0         | 0.81733   | 0.957 | 0.461 | 0         |
| Jund     | 0         | 0.712781  | 0.973 | 0.682 | 0         |
| Sertad1  | 0         | 0.559802  | 0.612 | 0.175 | 0         |
| Socs3    | 1.34E-296 | 0.613959  | 0.683 | 0.223 | 2.39E-292 |
| Ier3     | 2.63E-294 | 0.795825  | 0.691 | 0.241 | 4.70E-290 |
| Ier5l    | 5.06E-270 | 0.55644   | 0.608 | 0.196 | 9.05E-266 |
| Ier2     | 2.96E-254 | 0.666732  | 0.737 | 0.319 | 5.30E-250 |
| Gm48565  | 3.97E-245 | 0.398673  | 0.383 | 0.075 | 7.10E-241 |
| Cdkn1a   | 1.63E-238 | 0.646687  | 0.736 | 0.332 | 2.91E-234 |
| Klf4     | 2.25E-230 | 0.72523   | 0.821 | 0.45  | 4.03E-226 |
| Fos      | 6.54E-225 | 0.326432  | 0.818 | 0.36  | 1.17E-220 |
| Egr1     | 6.23E-222 | 0.570555  | 0.749 | 0.312 | 1.11E-217 |
| Btg2     | 1.04E-220 | 0.590506  | 0.87  | 0.519 | 1.87E-216 |
| Hsp90aa1 | 2.74E-218 | 0.552334  | 0.801 | 0.421 | 4.89E-214 |
| Tcim     | 2.63E-212 | 0.632205  | 0.849 | 0.494 | 4.70E-208 |
| Dusp1    | 6.61E-201 | 0.605065  | 0.808 | 0.446 | 1.18E-196 |
| Atf3     | 4.78E-193 | 0.517272  | 0.48  | 0.143 | 8.54E-189 |
| Gadd45g  | 1.97E-190 | 0.637473  | 0.55  | 0.202 | 3.52E-186 |
| Dnaja1   | 1.34E-189 | 0.543031  | 0.839 | 0.543 | 2.39E-185 |

## Cluster 3 - Endothelial

|            | p_val     | avg_logFC | pct.1 | pct.2 | p_val_adj |
|------------|-----------|-----------|-------|-------|-----------|
| Tm4sf1     | 0         | 1.198075  | 0.98  | 0.615 | 0         |
| Rbp7       | 0         | 1.093662  | 0.668 | 0.072 | 0         |
| Igfbp3     | 0         | 0.944933  | 0.64  | 0.125 | 0         |
| Stmn2      | 0         | 0.784036  | 0.59  | 0.065 | 0         |
| Sema3g     | 0         | 0.643189  | 0.548 | 0.066 | 0         |
| Hey1       | 0         | 0.483462  | 0.453 | 0.053 | 0         |
| St8sia6    | 0         | 0.339753  | 0.337 | 0.023 | 0         |
| Gja5       | 0         | 0.25476   | 0.198 | 0.002 | 0         |
| Alpl       | 5.44E-294 | 0.529432  | 0.552 | 0.097 | 9.72E-290 |
| Col8a1     | 8.60E-292 | 0.338936  | 0.279 | 0.017 | 1.54E-287 |
| Edn1       | 5.77E-288 | 0.544049  | 0.333 | 0.03  | 1.03E-283 |
| Btnl9      | 1.37E-272 | 0.559098  | 0.529 | 0.095 | 2.45E-268 |
| Fbln5      | 1.38E-218 | 0.540358  | 0.359 | 0.052 | 2.47E-214 |
| Efnb2      | 3.50E-176 | 0.48902   | 0.675 | 0.228 | 6.26E-172 |
| Vegfc      | 4.14E-174 | 0.288282  | 0.256 | 0.031 | 7.39E-170 |
| Tsc22d1    | 4.54E-170 | 0.626138  | 0.776 | 0.334 | 8.12E-166 |
| Tm6sf1     | 3.27E-158 | 0.341968  | 0.431 | 0.101 | 5.85E-154 |
| Mecom      | 2.75E-155 | 0.510528  | 0.624 | 0.225 | 4.91E-151 |
| Sox17      | 8.47E-141 | 0.483537  | 0.684 | 0.267 | 1.51E-136 |
| St6galnac2 | 1.73E-137 | 0.281783  | 0.338 | 0.071 | 3.09E-133 |
| Gja4       | 1.25E-136 | 0.27522   | 0.261 | 0.042 | 2.24E-132 |
| Unc5b      | 1.68E-134 | 0.328769  | 0.389 | 0.096 | 3.00E-130 |
| Fabp4      | 3.54E-119 | 0.590773  | 0.996 | 0.834 | 6.32E-115 |
| Id1        | 4.54E-114 | 0.570609  | 0.873 | 0.528 | 8.11E-110 |
| Epas1      | 1.04E-113 | 0.470352  | 0.976 | 0.724 | 1.87E-109 |

## Cluster 4 - Endothelial

|         | p_val | avg_logFC | pct.1 | pct.2 | p_val_adj |
|---------|-------|-----------|-------|-------|-----------|
| Acta1   | 0     | 3.901262  | 0.998 | 0.313 | 0         |
| Tnnc2   | 0     | 3.866413  | 1     | 0.294 | 0         |
| Mylpf   | 0     | 3.843921  | 0.995 | 0.326 | 0         |
| Myl1    | 0     | 3.594138  | 0.986 | 0.205 | 0         |
| Tnni2   | 0     | 3.548533  | 0.995 | 0.226 | 0         |
| Tnnt3   | 0     | 3.525328  | 0.986 | 0.213 | 0         |
| Ckm     | 0     | 3.476401  | 0.99  | 0.218 | 0         |
| Tpm1    | 0     | 3.368174  | 0.991 | 0.428 | 0         |
| Aldoa   | 0     | 2.781373  | 0.986 | 0.486 | 0         |
| Pvalb   | 0     | 2.491138  | 0.899 | 0.085 | 0         |
| Eno3    | 0     | 2.280304  | 0.938 | 0.067 | 0         |
| Slc25a4 | 0     | 2.226636  | 0.962 | 0.447 | 0         |
| Myh4    | 0     | 2.19766   | 0.76  | 0.067 | 0         |
| Tcap    | 0     | 2.192759  | 0.906 | 0.074 | 0         |
| Tpm2    | 0     | 2.04633   | 0.943 | 0.174 | 0         |
| Pgam2   | 0     | 2.04112   | 0.884 | 0.045 | 0         |
| Myoz1   | 0     | 1.972269  | 0.878 | 0.04  | 0         |
| Actn3   | 0     | 1.945674  | 0.82  | 0.039 | 0         |
| Atp2a1  | 0     | 1.899809  | 0.88  | 0.111 | 0         |
| Cox6a2  | 0     | 1.888358  | 0.872 | 0.063 | 0         |
| Chchd10 | 0     | 1.708514  | 0.854 | 0.085 | 0         |
| Atp5g1  | 0     | 1.6377    | 0.882 | 0.329 | 0         |
| Car3    | 0     | 1.491739  | 0.699 | 0.028 | 0         |
| Cox8b   | 0     | 1.488999  | 0.825 | 0.034 | 0         |
| Tpi1    | 0     | 1.463857  | 0.81  | 0.223 | 0         |

## Cluster 5 - Muscle Stem Cell

|          | p_val | avg_logFC | pct.1 | pct.2 | p_val_adj |
|----------|-------|-----------|-------|-------|-----------|
| Mt1      | 0     | 2.317966  | 0.755 | 0.115 | 0         |
| Mt2      | 0     | 1.983996  | 0.778 | 0.051 | 0         |
| Meg3     | 0     | 1.841958  | 0.81  | 0.068 | 0         |
| Gpx3     | 0     | 1.799921  | 0.979 | 0.057 | 0         |
| Chodl    | 0     | 1.557465  | 0.95  | 0.011 | 0         |
| Cxcl1    | 0     | 1.484914  | 0.506 | 0.049 | 0         |
| Cebpb    | 0     | 1.451755  | 0.787 | 0.156 | 0         |
| Nppc     | 0     | 1.36954   | 0.421 | 0.003 | 0         |
| Peg3     | 0     | 1.347562  | 0.897 | 0.037 | 0         |
| Sdc4     | 0     | 1.321009  | 0.82  | 0.065 | 0         |
| Gas1     | 0     | 1.094044  | 0.766 | 0.083 | 0         |
| Crlf1    | 0     | 1.087036  | 0.847 | 0.015 | 0         |
| Pax7     | 0     | 1.018882  | 0.791 | 0.001 | 0         |
| Cd63     | 0     | 0.942585  | 0.91  | 0.191 | 0         |
| Ppp1r14b | 0     | 0.939104  | 0.793 | 0.134 | 0         |
| Maff     | 0     | 0.926058  | 0.544 | 0.042 | 0         |
| Vcam1    | 0     | 0.897048  | 0.674 | 0.027 | 0         |
| Dhcr24   | 0     | 0.809872  | 0.663 | 0.028 | 0         |
| Rhoh     | 0     | 0.771015  | 0.358 | 0.006 | 0         |
| Pdlim4   | 0     | 0.77074   | 0.759 | 0.122 | 0         |
| Myf5     | 0     | 0.744147  | 0.571 | 0.002 | 0         |
| Fgfr1    | 0     | 0.693327  | 0.676 | 0.08  | 0         |
| Fgfr4    | 0     | 0.6592    | 0.638 | 0.001 | 0         |
| Clmn     | 0     | 0.622509  | 0.598 | 0.055 | 0         |
| Runx1    | 0     | 0.587122  | 0.506 | 0.029 | 0         |

## Cluster 6 - Pericyte

|          | p_val | avg_logFC | pct.1 | pct.2 | p_val_adj |
|----------|-------|-----------|-------|-------|-----------|
| Rgs5     | 0     | 2.593204  | 1     | 0.314 | 0         |
| Steap4   | 0     | 1.900901  | 0.963 | 0.068 | 0         |
| Abcc9    | 0     | 1.860878  | 0.966 | 0.037 | 0         |
| Pdgfrb   | 0     | 1.815564  | 0.989 | 0.073 | 0         |
| Vtn      | 0     | 1.808228  | 0.955 | 0.062 | 0         |
| Kcnj8    | 0     | 1.646975  | 0.907 | 0.025 | 0         |
| Ndufa4l2 | 0     | 1.447572  | 0.926 | 0.072 | 0         |
| Aspn     | 0     | 1.32386   | 0.862 | 0.07  | 0         |
| Notch3   | 0     | 1.201938  | 0.878 | 0.08  | 0         |
| Myl9     | 0     | 1.026448  | 0.884 | 0.092 | 0         |
| Gucy1a1  | 0     | 1.014499  | 0.794 | 0.048 | 0         |
| C1s1     | 0     | 0.994673  | 0.77  | 0.081 | 0         |
| Pacsin3  | 0     | 0.927676  | 0.69  | 0.049 | 0         |
| Dtx3     | 0     | 0.885108  | 0.717 | 0.075 | 0         |
| Gucy1b1  | 0     | 0.878994  | 0.717 | 0.041 | 0         |
| Cox4i2   | 0     | 0.836691  | 0.646 | 0.046 | 0         |
| Cpe      | 0     | 0.803657  | 0.725 | 0.089 | 0         |
| Rgs4     | 0     | 0.788664  | 0.593 | 0.045 | 0         |
| Col6a3   | 0     | 0.782376  | 0.759 | 0.077 | 0         |
| Itga7    | 0     | 0.763769  | 0.661 | 0.048 | 0         |
| Npy1r    | 0     | 0.751435  | 0.632 | 0.034 | 0         |
| Enpep    | 0     | 0.746712  | 0.59  | 0.021 | 0         |
| Ano1     | 0     | 0.72793   | 0.595 | 0.029 | 0         |
| Arhgdib  | 0     | 0.693789  | 0.606 | 0.058 | 0         |
| Casq2    | 0     | 0.689033  | 0.556 | 0.034 | 0         |

## Cluster 7 - FAP

|          | p_val | avg_logFC | pct.1 | pct.2 | p_val_adj |
|----------|-------|-----------|-------|-------|-----------|
| Gsn      | 0     | 4.085294  | 1     | 0.153 | 0         |
| Dcn      | 0     | 3.697783  | 0.997 | 0.042 | 0         |
| Col3a1   | 0     | 3.12197   | 0.997 | 0.09  | 0         |
| Cxcl14   | 0     | 2.559261  | 0.55  | 0.014 | 0         |
| Col1a2   | 0     | 2.403106  | 0.995 | 0.082 | 0         |
| Smoc2    | 0     | 2.256673  | 0.746 | 0.01  | 0         |
| Clec3b   | 0     | 2.141872  | 0.923 | 0.007 | 0         |
| Igfbp6   | 0     | 2.121333  | 0.937 | 0.022 | 0         |
| C3       | 0     | 2.025654  | 0.672 | 0.01  | 0         |
| Myoc     | 0     | 2.00977   | 0.754 | 0.015 | 0         |
| Apod     | 0     | 1.971087  | 0.706 | 0.044 | 0         |
| Col1a1   | 0     | 1.966086  | 0.955 | 0.048 | 0         |
| Serping1 | 0     | 1.948852  | 0.968 | 0.108 | 0         |
| Serpinf1 | 0     | 1.90152   | 0.95  | 0.023 | 0         |
| Lum      | 0     | 1.809908  | 0.802 | 0.007 | 0         |
| Tnxb     | 0     | 1.800068  | 0.897 | 0.039 | 0         |
| Timp2    | 0     | 1.75998   | 0.947 | 0.113 | 0         |
| Pi16     | 0     | 1.744158  | 0.447 | 0.006 | 0         |
| Mfap5    | 0     | 1.723061  | 0.839 | 0.017 | 0         |
| Col6a1   | 0     | 1.598987  | 0.899 | 0.047 | 0         |
| Ogn      | 0     | 1.596344  | 0.876 | 0.053 | 0         |
| Ccl11    | 0     | 1.561517  | 0.746 | 0.01  | 0         |
| Abca8a   | 0     | 1.557516  | 0.865 | 0.06  | 0         |
| Rnase4   | 0     | 1.55262   | 0.939 | 0.031 | 0         |
| Fstl1    | 0     | 1.518977  | 0.899 | 0.158 | 0         |

## Cluster 8 - Endothelial

|        | p_val     | avg_logFC | pct.1 | pct.2 | p_val_adj |
|--------|-----------|-----------|-------|-------|-----------|
| Ifit1  | 8.19E-262 | 0.961615  | 0.601 | 0.071 | 1.46E-257 |
| Ifit3  | 6.28E-197 | 0.615613  | 0.5   | 0.063 | 1.12E-192 |
| Ifi44  | 2.97E-151 | 0.459985  | 0.387 | 0.048 | 5.32E-147 |
| Ilgp1  | 2.95E-144 | 1.053422  | 0.902 | 0.319 | 5.27E-140 |
| Ifit2  | 1.65E-134 | 0.543682  | 0.405 | 0.06  | 2.95E-130 |
| Igtp   | 1.25E-120 | 0.555528  | 0.548 | 0.121 | 2.24E-116 |
| Gbp4   | 2.59E-108 | 0.871401  | 0.702 | 0.231 | 4.63E-104 |
| Gbp7   | 1.08E-105 | 0.711672  | 0.768 | 0.287 | 1.92E-101 |
| Rsad2  | 4.91E-105 | 0.961465  | 0.714 | 0.251 | 8.78E-101 |
| Isg15  | 2.15E-100 | 0.949988  | 0.592 | 0.175 | 3.84E-96  |
| Bst2   | 1.01E-99  | 0.870743  | 0.929 | 0.537 | 1.80E-95  |
| Stat1  | 1.03E-95  | 0.530056  | 0.589 | 0.169 | 1.84E-91  |
| Cmpk2  | 3.91E-95  | 0.503661  | 0.405 | 0.082 | 6.99E-91  |
| Parp14 | 9.02E-88  | 0.614756  | 0.637 | 0.22  | 1.61E-83  |
| Cd274  | 2.46E-86  | 0.49718   | 0.518 | 0.14  | 4.40E-82  |
| Ifi203 | 5.61E-84  | 0.716627  | 0.717 | 0.298 | 1.00E-79  |
| Gbp5   | 5.47E-82  | 0.411266  | 0.455 | 0.114 | 9.78E-78  |
| Gbp3   | 3.92E-73  | 0.455816  | 0.494 | 0.145 | 7.01E-69  |
| Ly6a   | 3.82E-72  | 0.690611  | 0.973 | 0.736 | 6.82E-68  |
| Irgm2  | 2.05E-70  | 0.329328  | 0.408 | 0.102 | 3.67E-66  |
| Tap1   | 2.11E-68  | 0.423183  | 0.527 | 0.168 | 3.77E-64  |
| Ifi47  | 6.30E-63  | 0.29427   | 0.333 | 0.077 | 1.13E-58  |
| Oasl2  | 6.44E-62  | 0.282781  | 0.327 | 0.075 | 1.15E-57  |
| Gbp2   | 9.29E-62  | 0.536706  | 0.554 | 0.205 | 1.66E-57  |
| Mndal  | 3.86E-61  | 0.570991  | 0.667 | 0.303 | 6.90E-57  |

## Cluster 9 - Smooth Muscle

|          | p_val | avg_logFC | pct.1 | pct.2 | p_val_adj |
|----------|-------|-----------|-------|-------|-----------|
| Acta2    | 0     | 3.999349  | 1     | 0.073 | 0         |
| Tagln    | 0     | 3.550223  | 0.996 | 0.069 | 0         |
| Myh11    | 0     | 2.881368  | 0.989 | 0.049 | 0         |
| Myl9     | 0     | 2.844824  | 1     | 0.097 | 0         |
| Mustn1   | 0     | 2.241377  | 0.982 | 0.173 | 0         |
| Mylk     | 0     | 2.145237  | 0.989 | 0.109 | 0         |
| Flna     | 0     | 2.085161  | 0.993 | 0.192 | 0         |
| Igfbp5   | 0     | 2.009717  | 0.971 | 0.14  | 0         |
| Pald     | 0     | 1.70685   | 0.93  | 0.05  | 0         |
| Ppp1r14a | 0     | 1.442326  | 0.893 | 0.05  | 0         |
| Aspn     | 0     | 1.434839  | 0.963 | 0.076 | 0         |
| Sorbs2   | 0     | 1.420331  | 0.879 | 0.086 | 0         |
| Pln      | 0     | 1.392018  | 0.849 | 0.001 | 0         |
| Sncg     | 0     | 1.372181  | 0.926 | 0.144 | 0         |
| Lbh      | 0     | 1.367791  | 0.934 | 0.059 | 0         |
| Pcp4l1   | 0     | 1.358559  | 0.938 | 0.152 | 0         |
| Rasl11a  | 0     | 1.358516  | 0.761 | 0.077 | 0         |
| Gucy1a1  | 0     | 1.339689  | 0.949 | 0.052 | 0         |
| Olfr558  | 0     | 1.258552  | 0.912 | 0.027 | 0         |
| Gm13889  | 0     | 1.247802  | 0.82  | 0.041 | 0         |
| Fbxl22   | 0     | 1.237611  | 0.835 | 0.007 | 0         |
| Csrp2    | 0     | 1.232602  | 0.868 | 0.121 | 0         |
| Notch3   | 0     | 1.21908   | 0.949 | 0.087 | 0         |
| Pde3a    | 0     | 1.177276  | 0.893 | 0.053 | 0         |
| Atp1a2   | 0     | 1.169333  | 0.912 | 0.12  | 0         |

## Cluster 10 - Endothelial

|         | p_val    | avg_logFC | pct.1 | pct.2 | p_val_adj |
|---------|----------|-----------|-------|-------|-----------|
| Malat1  | 9.88E-65 | -1.23924  | 0.986 | 0.982 | 1.77E-60  |
| mt-Co2  | 8.90E-39 | 0.455508  | 1     | 0.991 | 1.59E-34  |
| mt-Atp8 | 1.02E-34 | 0.487834  | 1     | 0.949 | 1.82E-30  |
| Rps20   | 2.86E-33 | 0.669075  | 1     | 0.954 | 5.11E-29  |
| Rps24   | 2.88E-33 | 0.558947  | 1     | 0.973 | 5.15E-29  |
| Rps29   | 6.97E-30 | 0.610739  | 1     | 0.979 | 1.25E-25  |
| Rps14   | 3.05E-29 | 0.402013  | 0.995 | 0.949 | 5.46E-25  |
| Rps21   | 1.80E-28 | 0.747586  | 1     | 0.969 | 3.22E-24  |
| Rps27a  | 7.22E-26 | 0.625206  | 1     | 0.946 | 1.29E-21  |
| Rps16   | 1.01E-24 | 0.464692  | 0.991 | 0.943 | 1.81E-20  |
| Rpl35a  | 8.78E-24 | 0.532192  | 0.981 | 0.94  | 1.57E-19  |
| Rpl30   | 1.34E-23 | 0.620576  | 0.968 | 0.911 | 2.40E-19  |
| Rpl38   | 1.82E-22 | 0.568476  | 0.981 | 0.905 | 3.25E-18  |
| Fau     | 2.54E-22 | 0.383876  | 1     | 0.973 | 4.53E-18  |
| Rps27   | 3.82E-22 | 0.510108  | 1     | 0.948 | 6.82E-18  |
| Rps12   | 7.03E-22 | 0.566325  | 1     | 0.948 | 1.26E-17  |
| Rpl34   | 7.30E-22 | 0.403724  | 0.977 | 0.919 | 1.30E-17  |
| Rpl23   | 1.93E-21 | 0.452355  | 0.991 | 0.955 | 3.45E-17  |
| Rps11   | 2.05E-21 | 0.602838  | 0.981 | 0.933 | 3.67E-17  |
| Rpl37a  | 3.21E-21 | 0.631106  | 0.991 | 0.963 | 5.74E-17  |
| Rpl27a  | 1.96E-20 | 0.45157   | 0.921 | 0.839 | 3.51E-16  |
| Rpl41   | 2.10E-20 | 0.526044  | 0.995 | 0.968 | 3.75E-16  |
| Tra2a   | 2.33E-20 | -0.37611  | 0.102 | 0.43  | 4.17E-16  |
| Srsf5   | 8.38E-20 | -0.35003  | 0.218 | 0.574 | 1.50E-15  |
| Gm37033 | 1.14E-19 | -0.41365  | 0.097 | 0.417 | 2.04E-15  |

## Cluster 11 - Glial

|         | p_val | avg_logFC | pct.1 | pct.2 | p_val_adj |
|---------|-------|-----------|-------|-------|-----------|
| Mpz     | 0     | 4.276489  | 1     | 0.012 | 0         |
| Mbp     | 0     | 3.039343  | 1     | 0.022 | 0         |
| Pmp22   | 0     | 3.038101  | 1     | 0.136 | 0         |
| Gatm    | 0     | 2.74454   | 1     | 0.014 | 0         |
| Mal     | 0     | 2.076495  | 0.99  | 0.006 | 0         |
| Fxyd3   | 0     | 1.882492  | 0.952 | 0.006 | 0         |
| Cnp     | 0     | 1.815555  | 0.966 | 0.049 | 0         |
| Plp1    | 0     | 1.794159  | 0.962 | 0.022 | 0         |
| Prx     | 0     | 1.793645  | 0.966 | 0.012 | 0         |
| Kcna1   | 0     | 1.771862  | 0.966 | 0.013 | 0         |
| Scd2    | 0     | 1.752289  | 0.971 | 0.103 | 0         |
| Ncmamp  | 0     | 1.620757  | 0.75  | 0.004 | 0         |
| Fxyd6   | 0     | 1.534207  | 0.947 | 0.091 | 0         |
| Egfl8   | 0     | 1.530045  | 0.894 | 0.015 | 0         |
| Gpm6b   | 0     | 1.423654  | 0.928 | 0.037 | 0         |
| Pou3f1  | 0     | 1.345465  | 0.827 | 0.043 | 0         |
| Stmn1   | 0     | 1.342949  | 0.885 | 0.081 | 0         |
| Cldn19  | 0     | 1.341252  | 0.899 | 0.004 | 0         |
| Plekha4 | 0     | 1.337912  | 0.913 | 0.013 | 0         |
| Aatk    | 0     | 1.317477  | 0.938 | 0.033 | 0         |
| Drp2    | 0     | 1.310912  | 0.87  | 0.02  | 0         |
| S100b   | 0     | 1.303766  | 0.803 | 0.012 | 0         |
| Plekhb1 | 0     | 1.217798  | 0.889 | 0.038 | 0         |
| Gjc3    | 0     | 1.179273  | 0.817 | 0.012 | 0         |
| Mt3     | 0     | 1.17483   | 0.74  | 0.011 | 0         |

## Cluster 12 - Endothelial

|          | p_val     | avg_logFC | pct.1 | pct.2 | p_val_adj |
|----------|-----------|-----------|-------|-------|-----------|
| Tmem252  | 0         | 1.080195  | 0.701 | 0.028 | 0         |
| AA467197 | 2.18E-277 | 0.489727  | 0.328 | 0.008 | 3.89E-273 |
| Inhbb    | 8.46E-189 | 0.392819  | 0.328 | 0.014 | 1.51E-184 |
| Sema3f   | 2.17E-154 | 0.550957  | 0.511 | 0.049 | 3.88E-150 |
| Csf2rb   | 1.71E-148 | 0.683987  | 0.402 | 0.031 | 3.06E-144 |
| Il4ra    | 4.07E-111 | 0.665151  | 0.684 | 0.125 | 7.27E-107 |
| Nus1     | 7.52E-102 | 0.854898  | 0.81  | 0.215 | 1.34E-97  |
| Medag    | 2.83E-96  | 0.599273  | 0.477 | 0.067 | 5.05E-92  |
| Grrp1    | 1.38E-92  | 0.679001  | 0.718 | 0.164 | 2.47E-88  |
| Ctla2a   | 1.58E-90  | 1.418819  | 0.966 | 0.468 | 2.82E-86  |
| Adamts4  | 6.55E-88  | 0.322561  | 0.31  | 0.03  | 1.17E-83  |
| Adamts9  | 4.04E-83  | 0.846284  | 0.724 | 0.192 | 7.22E-79  |
| Igfbp7   | 5.21E-83  | 1.029964  | 1     | 0.838 | 9.32E-79  |
| Rell1    | 1.53E-74  | 0.577411  | 0.546 | 0.113 | 2.74E-70  |
| Fxyd5    | 4.43E-74  | 0.585502  | 0.73  | 0.194 | 7.92E-70  |
| Ugcg     | 1.95E-70  | 0.582506  | 0.632 | 0.157 | 3.49E-66  |
| Ecsr     | 2.01E-67  | 0.901816  | 0.879 | 0.422 | 3.59E-63  |
| Adamts1  | 3.12E-60  | 0.790049  | 0.816 | 0.306 | 5.57E-56  |
| Cldn5    | 1.13E-59  | 1.110831  | 0.902 | 0.515 | 2.02E-55  |
| Litaf    | 7.55E-58  | 0.618975  | 0.701 | 0.229 | 1.35E-53  |
| Ifitm3   | 7.58E-58  | 0.808386  | 1     | 0.884 | 1.35E-53  |
| Actn1    | 8.63E-56  | 0.491628  | 0.575 | 0.15  | 1.54E-51  |
| Adam15   | 2.22E-53  | 0.610325  | 0.73  | 0.274 | 3.96E-49  |
| Pkig     | 4.78E-53  | 0.523795  | 0.511 | 0.133 | 8.54E-49  |
| Plaur    | 7.77E-53  | 0.260875  | 0.27  | 0.037 | 1.39E-48  |

## Cluster 13 - Endothelial

|           | p_val     | avg_logFC | pct.1 | pct.2 | p_val_adj |
|-----------|-----------|-----------|-------|-------|-----------|
| Plvap     | 0         | 1.955997  | 0.987 | 0.018 | 0         |
| Lrg1      | 0         | 1.777256  | 0.929 | 0.02  | 0         |
| Selp      | 0         | 1.37122   | 0.66  | 0.002 | 0         |
| Ackr1     | 0         | 0.805275  | 0.481 | 0.01  | 0         |
| Slco2a1   | 0         | 0.750816  | 0.622 | 0.013 | 0         |
| Spint2    | 0         | 0.682761  | 0.744 | 0.045 | 0         |
| Csf2rb2   | 0         | 0.499071  | 0.442 | 0.011 | 0         |
| Chp2      | 0         | 0.498835  | 0.494 | 0.018 | 0         |
| Pdia5     | 0         | 0.494698  | 0.513 | 0.015 | 0         |
| Cysltr1   | 0         | 0.482524  | 0.519 | 0.011 | 0         |
| Rasa4     | 1.31E-278 | 1.149412  | 0.827 | 0.07  | 2.35E-274 |
| Sele      | 3.09E-270 | 0.267947  | 0.147 | 0     | 5.52E-266 |
| Ehd4      | 3.00E-263 | 1.544335  | 0.949 | 0.111 | 5.36E-259 |
| Vwf       | 3.32E-259 | 1.493203  | 0.897 | 0.095 | 5.93E-255 |
| Tmem252   | 3.61E-242 | 0.653874  | 0.558 | 0.032 | 6.46E-238 |
| Hs3st1    | 2.95E-241 | 0.452739  | 0.455 | 0.02  | 5.27E-237 |
| Clu       | 4.07E-218 | 0.739629  | 0.532 | 0.033 | 7.28E-214 |
| Ret       | 2.01E-214 | 0.351052  | 0.353 | 0.013 | 3.59E-210 |
| Eln       | 4.86E-208 | 1.002334  | 0.756 | 0.077 | 8.68E-204 |
| Arrb1     | 1.77E-206 | 0.569286  | 0.615 | 0.048 | 3.17E-202 |
| Lhx6      | 4.65E-206 | 0.460393  | 0.526 | 0.033 | 8.31E-202 |
| Lepr      | 8.72E-203 | 0.316827  | 0.327 | 0.012 | 1.56E-198 |
| 2200002DC | 3.38E-199 | 0.536055  | 0.603 | 0.047 | 6.04E-195 |
| Ctnna1    | 7.87E-197 | 0.47028   | 0.494 | 0.031 | 1.41E-192 |
| Syt15     | 7.47E-196 | 0.258493  | 0.276 | 0.008 | 1.33E-191 |

## Cluster 14 - Macrophage

|        | p_val | avg_logFC | pct.1 | pct.2 | p_val_adj |
|--------|-------|-----------|-------|-------|-----------|
| Lyz2   | 0     | 3.429941  | 0.985 | 0.021 | 0         |
| Cd74   | 0     | 3.420838  | 0.831 | 0.015 | 0         |
| Retnla | 0     | 2.790905  | 0.331 | 0.003 | 0         |
| H2-Aa  | 0     | 2.61491   | 0.676 | 0.01  | 0         |
| H2-Eb1 | 0     | 2.49379   | 0.654 | 0.012 | 0         |
| H2-Ab1 | 0     | 2.463403  | 0.676 | 0.01  | 0         |
| C1qa   | 0     | 2.224738  | 0.559 | 0.001 | 0         |
| Fcer1g | 0     | 2.205855  | 0.993 | 0.012 | 0         |
| C1qb   | 0     | 2.185252  | 0.574 | 0.003 | 0         |
| Pf4    | 0     | 2.164768  | 0.551 | 0.014 | 0         |
| Tyrobp | 0     | 1.990108  | 0.993 | 0.012 | 0         |
| Ccl6   | 0     | 1.861319  | 0.779 | 0.008 | 0         |
| C1qc   | 0     | 1.830036  | 0.559 | 0.001 | 0         |
| Ctss   | 0     | 1.780255  | 0.956 | 0.004 | 0         |
| Ctsc   | 0     | 1.716502  | 0.912 | 0.016 | 0         |
| Wfdc17 | 0     | 1.63883   | 0.772 | 0.007 | 0         |
| Cd52   | 0     | 1.618518  | 0.676 | 0.017 | 0         |
| F13a1  | 0     | 1.593254  | 0.676 | 0.001 | 0         |
| Cd14   | 0     | 1.562207  | 0.699 | 0.013 | 0         |
| Tgfb1  | 0     | 1.485122  | 0.838 | 0.044 | 0         |
| Ccl9   | 0     | 1.479766  | 0.735 | 0.001 | 0         |
| Mrc1   | 0     | 1.477788  | 0.559 | 0.001 | 0         |
| Laptn5 | 0     | 1.469753  | 0.963 | 0.012 | 0         |
| Lgals3 | 0     | 1.448288  | 0.75  | 0.041 | 0         |
| Il1b   | 0     | 1.408222  | 0.412 | 0.009 | 0         |

## Cluster 15 - Pericyte

|          | p_val     | avg_logFC | pct.1 | pct.2 | p_val_adj |
|----------|-----------|-----------|-------|-------|-----------|
| Abcc9    | 0         | 1.261829  | 0.953 | 0.061 | 0         |
| Kcnj8    | 0         | 1.182937  | 0.898 | 0.048 | 0         |
| Vtn      | 9.99E-261 | 1.297077  | 0.977 | 0.085 | 1.79E-256 |
| Steap4   | 3.78E-244 | 1.224663  | 0.984 | 0.091 | 6.76E-240 |
| Plxdc1   | 2.54E-238 | 0.48729   | 0.586 | 0.029 | 4.54E-234 |
| Higd1b   | 9.62E-233 | 0.561475  | 0.625 | 0.035 | 1.72E-228 |
| Cox4i2   | 1.42E-228 | 0.732453  | 0.789 | 0.059 | 2.54E-224 |
| Ndufa4l2 | 2.51E-228 | 1.200227  | 0.961 | 0.094 | 4.48E-224 |
| Pdgfrb   | 1.38E-215 | 1.130628  | 0.953 | 0.097 | 2.47E-211 |
| Enpep    | 1.56E-197 | 0.487764  | 0.586 | 0.036 | 2.78E-193 |
| Myl9     | 5.25E-175 | 0.82403   | 0.938 | 0.112 | 9.37E-171 |
| Aspn     | 6.06E-173 | 0.796937  | 0.867 | 0.091 | 1.08E-168 |
| Gucy1a1  | 2.29E-164 | 0.573678  | 0.742 | 0.069 | 4.10E-160 |
| Arhgdib  | 2.05E-158 | 0.646642  | 0.719 | 0.071 | 3.67E-154 |
| Gucy1b1  | 1.07E-156 | 0.595236  | 0.664 | 0.06  | 1.91E-152 |
| Npy1r    | 6.68E-154 | 0.539028  | 0.602 | 0.05  | 1.19E-149 |
| Trpc3    | 3.71E-149 | 0.464419  | 0.508 | 0.037 | 6.63E-145 |
| Opcml    | 6.18E-149 | 0.428895  | 0.523 | 0.039 | 1.10E-144 |
| Casq2    | 7.70E-140 | 0.467177  | 0.562 | 0.048 | 1.38E-135 |
| Rgs4     | 2.62E-138 | 0.607868  | 0.617 | 0.059 | 4.68E-134 |
| Il34     | 2.46E-133 | 0.38242   | 0.469 | 0.035 | 4.40E-129 |
| Agtr1a   | 4.07E-133 | 0.327182  | 0.383 | 0.023 | 7.27E-129 |
| Eps8     | 2.83E-131 | 0.492587  | 0.609 | 0.061 | 5.06E-127 |
| Pacsin3  | 6.68E-126 | 0.514743  | 0.625 | 0.066 | 1.19E-121 |
| Ano1     | 9.70E-126 | 0.49545   | 0.516 | 0.045 | 1.73E-121 |



## Cluster 16 - Glial

|         | p_val | avg_logFC | pct.1 | pct.2 | p_val_adj |
|---------|-------|-----------|-------|-------|-----------|
| Col20a1 | 0     | 2.308385  | 0.87  | 0.002 | 0         |
| Ptn     | 0     | 2.024566  | 0.939 | 0.011 | 0         |
| Pou3f1  | 0     | 1.904595  | 0.913 | 0.05  | 0         |
| Gpm6b   | 0     | 1.882273  | 0.991 | 0.045 | 0         |
| Postn   | 0     | 1.698916  | 0.826 | 0.012 | 0         |
| Lgi4    | 0     | 1.615391  | 0.913 | 0.01  | 0         |
| Plp1    | 0     | 1.487662  | 0.93  | 0.032 | 0         |
| Bche    | 0     | 1.4518    | 0.765 | 0.003 | 0         |
| Matn2   | 0     | 1.402747  | 0.922 | 0.026 | 0         |
| Kcna1   | 0     | 1.260401  | 0.817 | 0.025 | 0         |
| Kank4   | 0     | 1.20352   | 0.748 | 0.014 | 0         |
| Nrn1    | 0     | 1.152341  | 0.861 | 0.003 | 0         |
| Kcna2   | 0     | 1.137587  | 0.87  | 0.027 | 0         |
| Ajap1   | 0     | 1.133501  | 0.722 | 0.002 | 0         |
| Ncam1   | 0     | 1.123457  | 0.87  | 0.034 | 0         |
| Matn4   | 0     | 1.116616  | 0.817 | 0.006 | 0         |
| Cdh19   | 0     | 1.096644  | 0.861 | 0.007 | 0         |
| Aspa    | 0     | 1.096359  | 0.817 | 0.012 | 0         |
| Chl1    | 0     | 1.065158  | 0.817 | 0.001 | 0         |
| Gas7    | 0     | 1.050929  | 0.852 | 0.026 | 0         |
| Cadm4   | 0     | 1.002443  | 0.748 | 0.014 | 0         |
| Gpr37l1 | 0     | 0.993484  | 0.774 | 0.009 | 0         |
| Foxd3   | 0     | 0.977549  | 0.696 | 0.009 | 0         |
| Ptprz1  | 0     | 0.96534   | 0.73  | 0.014 | 0         |
| Adam23  | 0     | 0.95785   | 0.757 | 0.007 | 0         |

## Cluster 17 - Unknown

|          | p_val     | avg_logFC | pct.1 | pct.2 | p_val_adj |
|----------|-----------|-----------|-------|-------|-----------|
| Alas2    | 0         | 1.372399  | 0.656 | 0.002 | 0         |
| Snca     | 9.50E-259 | 0.979589  | 0.489 | 0.013 | 1.70E-254 |
| Hba-a2   | 5.44E-233 | 5.329018  | 0.989 | 0.081 | 9.72E-229 |
| Hbb-bt   | 1.66E-231 | 5.046438  | 0.922 | 0.068 | 2.96E-227 |
| Tent5c   | 6.79E-228 | 0.832539  | 0.578 | 0.023 | 1.21E-223 |
| Hba-a1   | 2.51E-213 | 5.528609  | 1     | 0.093 | 4.48E-209 |
| Bpgm     | 1.25E-96  | 0.938139  | 0.478 | 0.039 | 2.23E-92  |
| Hbb-bs   | 1.57E-86  | 6.039027  | 1     | 0.318 | 2.81E-82  |
| Slc25a37 | 3.75E-78  | 0.436294  | 0.4   | 0.033 | 6.70E-74  |
| Ube2l6   | 2.84E-71  | 0.810966  | 0.589 | 0.083 | 5.08E-67  |
| lsg20    | 3.03E-69  | 0.392722  | 0.378 | 0.033 | 5.42E-65  |
| Mkrn1    | 4.50E-44  | 0.996186  | 0.533 | 0.108 | 8.05E-40  |
| Rps27a   | 9.80E-24  | -0.77831  | 0.589 | 0.951 | 1.75E-19  |
| Rplp1    | 4.24E-22  | -0.70793  | 0.7   | 0.978 | 7.57E-18  |
| Rpl8     | 1.35E-21  | -0.69477  | 0.533 | 0.926 | 2.41E-17  |
| Rps3a1   | 1.68E-21  | -0.73025  | 0.611 | 0.936 | 3.01E-17  |
| Rps5     | 3.53E-21  | -0.7454   | 0.578 | 0.923 | 6.31E-17  |
| Rpl18a   | 5.01E-21  | -0.69729  | 0.611 | 0.941 | 8.96E-17  |
| Rpl19    | 7.93E-21  | -0.67382  | 0.567 | 0.949 | 1.42E-16  |
| Rpl13    | 8.59E-21  | -0.70672  | 0.6   | 0.972 | 1.54E-16  |
| Ppia     | 2.24E-20  | -0.6429   | 0.533 | 0.927 | 4.01E-16  |
| Rps8     | 3.18E-20  | -0.711    | 0.622 | 0.961 | 5.69E-16  |
| Rps9     | 5.68E-20  | -0.73341  | 0.478 | 0.888 | 1.02E-15  |
| Rps2     | 6.19E-20  | -0.75067  | 0.522 | 0.894 | 1.11E-15  |
| Eif1     | 7.70E-20  | -0.59679  | 0.7   | 0.971 | 1.38E-15  |

## Cluster 18 - Tendon

|           | p_val | avg_logFC | pct.1 | pct.2 | p_val_adj |
|-----------|-------|-----------|-------|-------|-----------|
| Thbs4     | 0     | 3.823931  | 1     | 0.019 | 0         |
| Fmod      | 0     | 3.788457  | 1     | 0.013 | 0         |
| Serpinf1  | 0     | 2.580386  | 0.989 | 0.051 | 0         |
| Tnmd      | 0     | 1.860368  | 0.955 | 0.005 | 0         |
| Cilp      | 0     | 1.721798  | 0.966 | 0.007 | 0         |
| Kera      | 0     | 1.674469  | 0.764 | 0     | 0         |
| Aebp1     | 0     | 1.624195  | 0.978 | 0.051 | 0         |
| Cilp2     | 0     | 1.5759    | 0.82  | 0.001 | 0         |
| Angptl7   | 0     | 1.532482  | 0.348 | 0.003 | 0         |
| Comp      | 0     | 1.32689   | 0.427 | 0.003 | 0         |
| Cpxm2     | 0     | 1.287962  | 0.753 | 0.016 | 0         |
| Ptn       | 0     | 1.27052   | 0.652 | 0.016 | 0         |
| Fbln1     | 0     | 1.266645  | 0.764 | 0.015 | 0         |
| Scx       | 0     | 1.2277    | 0.708 | 0.004 | 0         |
| Tnc       | 0     | 1.207727  | 0.809 | 0.003 | 0         |
| Thbs2     | 0     | 1.177192  | 0.865 | 0.03  | 0         |
| Mfap4     | 0     | 1.167497  | 0.573 | 0.002 | 0         |
| Spon2     | 0     | 1.163427  | 0.596 | 0.012 | 0         |
| Chad      | 0     | 1.160233  | 0.348 | 0     | 0         |
| 15000150: | 0     | 1.15273   | 0.382 | 0.002 | 0         |
| Fbln7     | 0     | 1.096929  | 0.787 | 0.013 | 0         |
| Col12a1   | 0     | 1.074829  | 0.854 | 0.016 | 0         |
| Itgbl1    | 0     | 1.051718  | 0.742 | 0.01  | 0         |
| Col11a1   | 0     | 1.051105  | 0.764 | 0.005 | 0         |
| Timp1     | 0     | 0.817843  | 0.494 | 0.008 | 0         |

## Cluster 19 - Neutrophil

|         | p_val | avg_logFC | pct.1 | pct.2 | p_val_adj |
|---------|-------|-----------|-------|-------|-----------|
| S100a9  | 0     | 5.02246   | 0.986 | 0.006 | 0         |
| S100a8  | 0     | 4.658061  | 0.971 | 0.006 | 0         |
| Il1b    | 0     | 3.036158  | 0.986 | 0.008 | 0         |
| Cxcl2   | 0     | 2.856194  | 0.71  | 0.015 | 0         |
| Tyrobp  | 0     | 2.498905  | 1     | 0.019 | 0         |
| Wfdc17  | 0     | 2.331529  | 0.739 | 0.012 | 0         |
| Retnlg  | 0     | 2.236484  | 0.71  | 0     | 0         |
| Slpi    | 0     | 2.219229  | 0.884 | 0.002 | 0         |
| Ifitm1  | 0     | 2.114768  | 0.841 | 0.023 | 0         |
| Slc7a11 | 0     | 1.993541  | 0.957 | 0.002 | 0         |
| Hdc     | 0     | 1.917693  | 0.957 | 0.006 | 0         |
| Acod1   | 0     | 1.892645  | 0.87  | 0.001 | 0         |
| Csf3r   | 0     | 1.858063  | 0.899 | 0.003 | 0         |
| Fcer1g  | 0     | 1.832451  | 0.957 | 0.019 | 0         |
| Cd52    | 0     | 1.804218  | 0.942 | 0.019 | 0         |
| Ccl6    | 0     | 1.711678  | 0.841 | 0.013 | 0         |
| Clec4e  | 0     | 1.675209  | 0.797 | 0.004 | 0         |
| Ptpcr   | 0     | 1.616946  | 0.913 | 0.019 | 0         |
| Tnfaip2 | 0     | 1.595585  | 0.884 | 0.027 | 0         |
| Lcp1    | 0     | 1.58385   | 0.971 | 0.032 | 0         |
| Il1r2   | 0     | 1.572105  | 0.783 | 0.005 | 0         |
| Clec4d  | 0     | 1.540068  | 0.913 | 0.004 | 0         |
| Clec7a  | 0     | 1.50974   | 0.783 | 0.007 | 0         |
| Hp      | 0     | 1.434314  | 0.783 | 0.004 | 0         |
| Plek    | 0     | 1.397545  | 0.826 | 0.017 | 0         |

## Cluster 20 - T Cell

|           | p_val | avg_logFC | pct.1 | pct.2 | p_val_adj |
|-----------|-------|-----------|-------|-------|-----------|
| Ccl5      | 0     | 3.35816   | 0.615 | 0.001 | 0         |
| Gzma      | 0     | 2.532361  | 0.41  | 0     | 0         |
| Nkg7      | 0     | 1.61424   | 0.641 | 0     | 0         |
| Ptprc     | 0     | 1.574539  | 0.974 | 0.022 | 0         |
| Ms4a4b    | 0     | 1.453077  | 0.949 | 0.001 | 0         |
| Hcst      | 0     | 0.980437  | 0.744 | 0.008 | 0         |
| Trbc2     | 0     | 0.95135   | 0.641 | 0     | 0         |
| Txk       | 0     | 0.929683  | 0.641 | 0.001 | 0         |
| Il2rb     | 0     | 0.836144  | 0.59  | 0     | 0         |
| Klrd1     | 0     | 0.835206  | 0.538 | 0.001 | 0         |
| Trbc1     | 0     | 0.82497   | 0.564 | 0     | 0         |
| Cd3d      | 0     | 0.790473  | 0.513 | 0     | 0         |
| Arhgap45  | 0     | 0.728252  | 0.744 | 0.012 | 0         |
| Cd3g      | 0     | 0.667172  | 0.487 | 0     | 0         |
| Lef1      | 0     | 0.666442  | 0.462 | 0.001 | 0         |
| Ptpn22    | 0     | 0.665088  | 0.564 | 0.002 | 0         |
| Gm4759    | 0     | 0.638212  | 0.615 | 0.002 | 0         |
| Klrk1     | 0     | 0.612583  | 0.333 | 0.001 | 0         |
| Tcf7      | 0     | 0.610501  | 0.462 | 0.003 | 0         |
| Klra8     | 0     | 0.599118  | 0.231 | 0     | 0         |
| Cd2       | 0     | 0.595787  | 0.538 | 0.003 | 0         |
| Lck       | 0     | 0.568878  | 0.615 | 0.002 | 0         |
| 5830444F1 | 0     | 0.565655  | 0.513 | 0.003 | 0         |
| Klra4     | 0     | 0.555946  | 0.231 | 0     | 0         |
| Ifng      | 0     | 0.555946  | 0.282 | 0     | 0         |

## Cluster 21 - B Cell

|           | p_val | avg_logFC | pct.1 | pct.2 | p_val_adj |
|-----------|-------|-----------|-------|-------|-----------|
| Igkc      | 0     | 3.124537  | 1     | 0.001 | 0         |
| Cd74      | 0     | 3.031994  | 1     | 0.022 | 0         |
| Ighm      | 0     | 2.296448  | 1     | 0.013 | 0         |
| Cd79a     | 0     | 2.100019  | 1     | 0.001 | 0         |
| H2-Aa     | 0     | 1.994977  | 0.974 | 0.015 | 0         |
| H2-Eb1    | 0     | 1.933533  | 0.947 | 0.018 | 0         |
| H2-Ab1    | 0     | 1.866435  | 0.974 | 0.016 | 0         |
| Ly6d      | 0     | 1.834476  | 0.842 | 0     | 0         |
| Cd79b     | 0     | 1.634684  | 0.921 | 0.001 | 0         |
| Iglc2     | 0     | 1.526262  | 0.842 | 0.001 | 0         |
| Ms4a1     | 0     | 1.245216  | 0.921 | 0     | 0         |
| Iglc1     | 0     | 1.088968  | 0.447 | 0     | 0         |
| Ighd      | 0     | 1.071423  | 0.763 | 0.001 | 0         |
| Ccr7      | 0     | 1.067782  | 0.684 | 0.002 | 0         |
| Iglc3     | 0     | 1.006596  | 0.579 | 0     | 0         |
| Fcmr      | 0     | 0.839646  | 0.632 | 0     | 0         |
| Cd37      | 0     | 0.8301    | 0.684 | 0.008 | 0         |
| Ralgps2   | 0     | 0.781104  | 0.789 | 0.009 | 0         |
| Vpreb3    | 0     | 0.756759  | 0.474 | 0     | 0         |
| Bank1     | 0     | 0.742357  | 0.526 | 0.002 | 0         |
| Ltb       | 0     | 0.733654  | 0.605 | 0.007 | 0         |
| Gm8369    | 0     | 0.730507  | 0.447 | 0.001 | 0         |
| H2-Ob     | 0     | 0.716935  | 0.684 | 0.002 | 0         |
| 5830444F1 | 0     | 0.702265  | 0.526 | 0.003 | 0         |
| Ptprcap   | 0     | 0.648607  | 0.553 | 0.003 | 0         |

## Cluster 22 - Unknown

|         | p_val     | avg_logFC | pct.1 | pct.2 | p_val_adj |
|---------|-----------|-----------|-------|-------|-----------|
| Cldn1   | 0         | 1.3075    | 0.946 | 0.001 | 0         |
| Klf5    | 0         | 1.190688  | 0.892 | 0.01  | 0         |
| Lypd2   | 0         | 1.098508  | 0.73  | 0     | 0         |
| Tenm2   | 0         | 0.920015  | 0.676 | 0.001 | 0         |
| Wnt6    | 0         | 0.886497  | 0.676 | 0.002 | 0         |
| Lgals7  | 0         | 0.854782  | 0.216 | 0     | 0         |
| C2      | 0         | 0.790498  | 0.622 | 0.005 | 0         |
| Krt19   | 0         | 0.745478  | 0.568 | 0     | 0         |
| Cdh11   | 0         | 0.737381  | 0.622 | 0.007 | 0         |
| Moxd1   | 0         | 0.622563  | 0.595 | 0.001 | 0         |
| Slc6a13 | 0         | 0.576966  | 0.514 | 0.002 | 0         |
| Hcn4    | 0         | 0.449004  | 0.297 | 0.001 | 0         |
| Stra6   | 0         | 0.448691  | 0.27  | 0.001 | 0         |
| Mpzl2   | 0         | 0.412975  | 0.324 | 0.001 | 0         |
| Cldn22  | 0         | 0.377858  | 0.324 | 0     | 0         |
| Dleu7   | 0         | 0.358749  | 0.351 | 0.001 | 0         |
| Gjb5    | 0         | 0.358436  | 0.324 | 0.001 | 0         |
| Egfl6   | 3.73E-306 | 0.411103  | 0.378 | 0.002 | 6.67E-302 |
| Shisa3  | 4.91E-297 | 0.318201  | 0.351 | 0.002 | 8.77E-293 |
| Itgb4   | 1.96E-288 | 1.195839  | 0.892 | 0.019 | 3.51E-284 |
| Sfrp5   | 2.93E-278 | 2.059183  | 0.973 | 0.024 | 5.24E-274 |
| Hmgcs2  | 6.52E-262 | 0.61127   | 0.568 | 0.008 | 1.16E-257 |
| Il33    | 6.47E-255 | 0.811504  | 0.73  | 0.014 | 1.16E-250 |
| Xpnpep2 | 2.10E-252 | 0.258512  | 0.297 | 0.002 | 3.75E-248 |
| Ephb2   | 2.67E-252 | 0.258304  | 0.297 | 0.002 | 4.78E-248 |
