# Supplementary material
Source: PubMed Central journal article supplement (PMC9492804)
Supplement: NIHMS1791440-supplement-tS2.pdf [file NIHMS1791440-supplement-tS2.pdf]

Table 2. Top 25 Differentially Expressed Genes Control vs. Immobilization

Cluster 0 - Endothelial

|         | p_val     | avg_logFC | pct.1 | pct.2 | p_val_adj |
|---------|-----------|-----------|-------|-------|-----------|
| mt-Rnr2 | 2.67E-180 | -0.33824  | 1     | 1     | 4.77E-176 |
| mt-Atp6 | 4.53E-116 | -0.35158  | 1     | 1     | 8.10E-112 |
| Rps29   | 4.28E-60  | 0.288046  | 0.999 | 0.999 | 7.65E-56  |
| Rpl41   | 2.28E-56  | 0.308871  | 0.998 | 0.985 | 4.08E-52  |
| Rps21   | 2.29E-51  | 0.288051  | 0.998 | 0.991 | 4.10E-47  |
| Rpl37a  | 9.91E-46  | 0.274789  | 0.993 | 0.992 | 1.77E-41  |
| Rpl35a  | 6.14E-44  | 0.283791  | 0.996 | 0.977 | 1.10E-39  |
| Rpl38   | 1.21E-43  | 0.293589  | 0.969 | 0.938 | 2.17E-39  |
| Rps27   | 4.59E-41  | 0.273076  | 0.994 | 0.98  | 8.21E-37  |
| Rpl37   | 6.03E-34  | 0.253834  | 0.979 | 0.961 | 1.08E-29  |
| Uba52   | 4.31E-26  | 0.267591  | 0.758 | 0.593 | 7.70E-22  |
| Rps28   | 8.69E-24  | 0.279384  | 0.774 | 0.662 | 1.55E-19  |
| Ctla2a  | 6.74E-23  | -0.31366  | 0.71  | 0.862 | 1.20E-18  |
| Hspa1b  | 4.05E-10  | 0.334648  | 0.54  | 0.446 | 7.24E-06  |

Cluster 1 - Endothelial

|         | p_val     | avg_logFC | pct.1 | pct.2 | p_val_adj |
|---------|-----------|-----------|-------|-------|-----------|
| mt-Rnr2 | 4.58E-198 | -0.41599  | 1     | 1     | 8.19E-194 |
| mt-Atp6 | 1.02E-137 | -0.33412  | 1     | 1     | 1.81E-133 |
| Rpl41   | 1.36E-26  | 0.314234  | 0.968 | 0.89  | 2.44E-22  |
| Rpl35a  | 2.25E-22  | 0.274909  | 0.941 | 0.78  | 4.02E-18  |
| Rps29   | 5.39E-22  | 0.277177  | 0.988 | 0.93  | 9.63E-18  |
| Rps21   | 1.54E-19  | 0.263742  | 0.974 | 0.907 | 2.75E-15  |
| Rpl37a  | 4.52E-18  | 0.253526  | 0.968 | 0.859 | 8.08E-14  |
| Rpl30   | 2.93E-17  | 0.255666  | 0.884 | 0.714 | 5.23E-13  |
| Hspa1b  | 9.49E-13  | 0.26556   | 0.29  | 0.141 | 1.70E-08  |
| Gm42418 | 2.88E-07  | 0.299853  | 0.977 | 0.957 | 0.005141  |

## Cluster 2 - Endothelial

|         | p_val     | avg_logFC | pct.1 | pct.2 | p_val_adj |
|---------|-----------|-----------|-------|-------|-----------|
| mt-Rnr2 | 1.27E-147 | -0.37342  | 1     | 1     | 2.27E-143 |
| mt-Nd2  | 5.11E-102 | -0.25118  | 1     | 1     | 9.12E-98  |
| mt-Atp6 | 2.94E-79  | -0.35914  | 1     | 1     | 5.26E-75  |
| Rpl41   | 1.60E-40  | 0.326579  | 0.993 | 0.981 | 2.85E-36  |
| Rpl38   | 1.80E-22  | 0.272304  | 0.95  | 0.899 | 3.22E-18  |
| Hspa1b  | 2.88E-22  | 0.392887  | 0.949 | 0.92  | 5.14E-18  |
| Zfp36   | 8.24E-15  | 0.315286  | 0.875 | 0.827 | 1.47E-10  |
| Ctla2a  | 1.30E-13  | -0.30463  | 0.632 | 0.784 | 2.32E-09  |
| Egr1    | 2.18E-13  | 0.436359  | 0.79  | 0.674 | 3.90E-09  |
| Klf4    | 6.63E-12  | 0.314913  | 0.841 | 0.784 | 1.19E-07  |
| Tmsb10  | 2.83E-11  | 0.253281  | 0.729 | 0.62  | 5.05E-07  |
| Hbb-bs  | 4.27E-06  | 0.314477  | 0.372 | 0.261 | 0.076282  |
| Rgs5    | 1.36E-05  | 0.337627  | 0.448 | 0.357 | 0.243907  |

## Cluster 3 - Endothelial

|         | p_val    | avg_logFC | pct.1 | pct.2 | p_val_adj |
|---------|----------|-----------|-------|-------|-----------|
| mt-Rnr2 | 6.25E-62 | -0.3377   | 1     | 1     | 1.12E-57  |
| mt-Atp6 | 3.16E-46 | -0.3751   | 1     | 1     | 5.65E-42  |
| Rpl41   | 5.15E-29 | 0.356059  | 0.991 | 0.989 | 9.20E-25  |
| Rps29   | 5.34E-24 | 0.297198  | 0.998 | 0.994 | 9.55E-20  |
| Rpl37a  | 4.95E-20 | 0.327482  | 0.991 | 0.966 | 8.84E-16  |
| Rpl38   | 1.77E-19 | 0.328873  | 0.986 | 0.923 | 3.17E-15  |
| Rpl35a  | 1.47E-18 | 0.306672  | 0.993 | 0.98  | 2.63E-14  |
| Rpl39   | 1.00E-17 | 0.325025  | 0.942 | 0.898 | 1.79E-13  |
| Rps27   | 8.68E-17 | 0.308965  | 1     | 0.983 | 1.55E-12  |
| Rpl37   | 8.54E-16 | 0.294588  | 0.988 | 0.96  | 1.53E-11  |
| Rps21   | 4.00E-15 | 0.299998  | 0.991 | 0.991 | 7.14E-11  |
| Rps28   | 2.19E-14 | 0.335862  | 0.818 | 0.682 | 3.92E-10  |
| Uba52   | 4.71E-14 | 0.310966  | 0.765 | 0.599 | 8.41E-10  |
| Rpl30   | 1.69E-13 | 0.281454  | 0.974 | 0.943 | 3.02E-09  |
| Rgs5    | 4.68E-09 | 0.453147  | 0.564 | 0.364 | 8.36E-05  |
| Hspa1b  | 4.52E-06 | 0.367903  | 0.674 | 0.56  | 0.080825  |
| Hbb-bs  | 7.41E-05 | 0.518591  | 0.333 | 0.213 | 1         |
| Ctla2a  | 7.85E-05 | -0.27955  | 0.387 | 0.5   | 1         |
| Vim     | 0.001083 | -0.27744  | 0.72  | 0.784 | 1         |

## Cluster 4 - Endothelial

|           | p_val    | avg_logFC | pct.1 | pct.2 | p_val_adj |
|-----------|----------|-----------|-------|-------|-----------|
| mt-Rnr2   | 1.26E-52 | -0.39107  | 1     | 1     | 2.24E-48  |
| mt-Atp6   | 2.12E-32 | -0.34872  | 1     | 1     | 3.79E-28  |
| Rpl41     | 9.98E-18 | 0.42581   | 0.993 | 0.925 | 1.78E-13  |
| Rpl38     | 2.86E-16 | 0.394327  | 0.97  | 0.853 | 5.11E-12  |
| Rpl37a    | 3.13E-15 | 0.376972  | 0.993 | 0.939 | 5.59E-11  |
| Rpl35     | 5.06E-14 | 0.367524  | 0.911 | 0.706 | 9.05E-10  |
| Rps21     | 8.23E-13 | 0.350391  | 0.98  | 0.896 | 1.47E-08  |
| Rps29     | 3.84E-12 | 0.319109  | 0.997 | 0.971 | 6.87E-08  |
| Rpl39     | 1.06E-11 | 0.357006  | 0.931 | 0.817 | 1.90E-07  |
| Rps8      | 3.27E-11 | 0.320534  | 0.98  | 0.928 | 5.85E-07  |
| Ttn       | 1.73E-10 | 0.449     | 0.715 | 0.538 | 3.09E-06  |
| Rplp2     | 9.01E-10 | 0.293566  | 0.934 | 0.846 | 1.61E-05  |
| Rps26     | 2.97E-09 | 0.32233   | 0.849 | 0.742 | 5.30E-05  |
| Rpl37     | 3.16E-09 | 0.268188  | 0.974 | 0.871 | 5.64E-05  |
| Rps10     | 2.00E-07 | 0.264502  | 0.741 | 0.541 | 0.003576  |
| Phlda3    | 2.20E-07 | -0.28521  | 0.354 | 0.552 | 0.003929  |
| Atp5e     | 1.28E-06 | 0.292085  | 0.944 | 0.921 | 0.02285   |
| Myh4      | 2.94E-06 | 0.435759  | 0.8   | 0.717 | 0.052539  |
| Cox7c     | 3.08E-06 | 0.265974  | 0.915 | 0.885 | 0.055098  |
| Ndufb1-ps | 3.48E-06 | 0.277716  | 0.81  | 0.767 | 0.06212   |
| Fhl1      | 4.01E-06 | -0.41187  | 0.148 | 0.301 | 0.07159   |
| Ldha      | 2.15E-05 | -0.25526  | 0.777 | 0.878 | 0.383705  |
| Tpm2      | 4.16E-05 | -0.25319  | 0.921 | 0.968 | 0.744201  |
| Usmg5     | 5.59E-05 | 0.252448  | 0.77  | 0.695 | 0.999709  |
| Eno3      | 5.60E-05 | -0.26928  | 0.931 | 0.946 | 1         |

## Cluster 5 - Muscle Stem Cell

|         | p_val    | avg_logFC | pct.1 | pct.2 | p_val_adj |
|---------|----------|-----------|-------|-------|-----------|
| mt-Rnr2 | 5.74E-56 | -0.40406  | 1     | 1     | 1.03E-51  |
| mt-Nd2  | 7.81E-45 | -0.25695  | 1     | 1     | 1.40E-40  |
| mt-Nd4  | 2.15E-42 | -0.25266  | 1     | 1     | 3.84E-38  |
| mt-Atp6 | 2.46E-38 | -0.36468  | 1     | 1     | 4.40E-34  |
| Rpl41   | 1.16E-22 | 0.349899  | 1     | 0.991 | 2.07E-18  |
| Rps28   | 8.09E-13 | 0.294412  | 0.984 | 0.982 | 1.45E-08  |
| Nfkbia  | 7.99E-09 | 0.355531  | 0.681 | 0.443 | 0.000143  |
| Stat3   | 7.36E-07 | 0.304996  | 0.634 | 0.439 | 0.013149  |
| Fabp4   | 1.68E-06 | 0.729726  | 0.393 | 0.195 | 0.030081  |
| Hbb-bs  | 1.70E-06 | 1.761678  | 0.444 | 0.24  | 0.030414  |
| Kdm6b   | 1.93E-06 | 0.365162  | 0.541 | 0.376 | 0.034541  |
| Nppc    | 2.50E-06 | -0.5886   | 0.339 | 0.516 | 0.044771  |
| Ahnak   | 4.65E-06 | 0.266027  | 0.786 | 0.661 | 0.083145  |
| Mt2     | 5.21E-06 | 0.460912  | 0.813 | 0.738 | 0.093107  |
| Igfbp5  | 1.29E-05 | 0.51685   | 0.732 | 0.593 | 0.230176  |
| Fosb    | 3.29E-05 | 0.431115  | 0.79  | 0.774 | 0.588517  |
| H2-K1   | 5.40E-05 | 0.261292  | 0.537 | 0.371 | 0.964941  |
| Hspa1a  | 8.95E-05 | -0.35192  | 0.782 | 0.819 | 1         |
| Nfkbiz  | 9.43E-05 | 0.424172  | 0.572 | 0.48  | 1         |
| Fos     | 0.00018  | -0.31187  | 0.852 | 0.846 | 1         |
| Ifitm3  | 0.000233 | 0.279409  | 0.743 | 0.629 | 1         |
| Erfe    | 0.000806 | -0.26445  | 0.198 | 0.326 | 1         |
| Ier2    | 0.002137 | -0.45894  | 0.603 | 0.661 | 1         |
| Ubc     | 0.002625 | -0.25762  | 0.86  | 0.869 | 1         |
| Nop58   | 0.002704 | 0.283435  | 0.475 | 0.371 | 1         |

## Cluster 6 - Pericyte

|          | p_val    | avg_logFC | pct.1 | pct.2 | p_val_adj |
|----------|----------|-----------|-------|-------|-----------|
| mt-Rnr2  | 9.00E-51 | -0.46689  | 1     | 1     | 1.61E-46  |
| mt-Atp6  | 3.37E-38 | -0.39131  | 1     | 1     | 6.02E-34  |
| Zfp36l1  | 6.05E-08 | 0.470419  | 0.706 | 0.535 | 0.001082  |
| Malat1   | 3.18E-07 | 0.310437  | 1     | 1     | 0.005675  |
| Rps29    | 4.46E-07 | 0.312093  | 0.946 | 0.809 | 0.007969  |
| Tpm2     | 8.84E-07 | -0.34005  | 0.62  | 0.803 | 0.015795  |
| Acta2    | 2.27E-06 | -0.43361  | 0.529 | 0.777 | 0.040644  |
| Ndufa4l2 | 2.58E-06 | -0.30913  | 0.896 | 0.968 | 0.046078  |
| Rpl41    | 2.58E-06 | 0.290606  | 0.95  | 0.732 | 0.046128  |
| Lgals1   | 4.74E-06 | -0.37299  | 0.606 | 0.828 | 0.084806  |
| Igfbp5   | 6.13E-06 | 0.587619  | 0.615 | 0.433 | 0.109508  |
| Aldh2    | 9.34E-06 | -0.30691  | 0.502 | 0.713 | 0.166884  |
| Vtn      | 1.49E-05 | -0.35111  | 0.941 | 0.975 | 0.265928  |
| Junb     | 2.46E-05 | 0.278324  | 0.271 | 0.096 | 0.439614  |
| Myl9     | 5.13E-05 | -0.25366  | 0.837 | 0.949 | 0.917012  |
| Hspa1b   | 0.000128 | 0.525666  | 0.389 | 0.217 | 1         |
| Son      | 0.000136 | 0.251531  | 0.792 | 0.758 | 1         |
| Klf9     | 0.001285 | 0.25776   | 0.724 | 0.669 | 1         |
| Egr1     | 0.002179 | 0.315555  | 0.285 | 0.159 | 1         |
| Hbb-bs   | 0.003919 | -0.81363  | 0.398 | 0.261 | 1         |
| Tagln    | 0.006297 | -0.36187  | 0.294 | 0.414 | 1         |
| Fos      | 0.011737 | 0.277444  | 0.226 | 0.127 | 1         |
| Jund     | 0.012308 | 0.288905  | 0.615 | 0.586 | 1         |
| Hspa1a   | 0.026114 | 0.288118  | 0.421 | 0.325 | 1         |
| Gm8696   | 0.027657 | 0.252248  | 0.163 | 0.089 | 1         |

## Cluster 7 - FAP

|         | p_val    | avg_logFC | pct.1 | pct.2 | p_val_adj |
|---------|----------|-----------|-------|-------|-----------|
| mt-Rnr2 | 1.19E-16 | -0.31209  | 1     | 1     | 2.13E-12  |
| mt-Atp6 | 5.00E-11 | -0.27736  | 1     | 1     | 8.94E-07  |
| Myoc    | 2.93E-08 | -0.7068   | 0.695 | 0.818 | 0.000524  |
| Igfbp6  | 1.16E-07 | -0.44709  | 0.924 | 0.95  | 0.002079  |
| Tpt1    | 1.32E-06 | -0.26455  | 0.99  | 0.989 | 0.023574  |
| Cd34    | 1.81E-06 | -0.30204  | 0.853 | 0.901 | 0.032292  |
| Anxa2   | 2.43E-06 | -0.29727  | 0.619 | 0.79  | 0.043386  |
| Ecm1    | 3.47E-06 | -0.42291  | 0.685 | 0.823 | 0.062034  |
| Fbn1    | 6.57E-06 | -0.43881  | 0.756 | 0.862 | 0.11735   |
| Islr    | 1.56E-05 | -0.26193  | 0.67  | 0.807 | 0.27903   |
| Svep1   | 4.76E-05 | 0.284927  | 0.66  | 0.53  | 0.850868  |
| Mfap5   | 6.41E-05 | -0.42461  | 0.802 | 0.878 | 1         |
| Ugdh    | 6.54E-05 | -0.28626  | 0.294 | 0.47  | 1         |
| Cxcl12  | 7.02E-05 | 0.31112   | 0.518 | 0.343 | 1         |
| Tnxb    | 8.49E-05 | -0.31606  | 0.878 | 0.917 | 1         |
| mt-Atp8 | 8.55E-05 | 0.281953  | 0.888 | 0.779 | 1         |
| Uba52   | 0.000105 | 0.257891  | 0.558 | 0.403 | 1         |
| Bgn     | 0.000107 | -0.43936  | 0.594 | 0.702 | 1         |
| Pcolce2 | 0.000125 | -0.34547  | 0.467 | 0.624 | 1         |
| Rpl41   | 0.000149 | 0.253145  | 0.97  | 0.967 | 1         |
| Cdkn1c  | 0.000153 | 0.301564  | 0.396 | 0.227 | 1         |
| Nbl1    | 0.000161 | -0.32002  | 0.452 | 0.619 | 1         |
| Fst     | 0.000236 | 0.285102  | 0.482 | 0.32  | 1         |
| Lpl     | 0.000329 | 0.397546  | 0.792 | 0.713 | 1         |
| Col14a1 | 0.000401 | -0.35173  | 0.401 | 0.519 | 1         |

## Cluster 8 - Endothelial

|         | p_val    | avg_logFC | pct.1 | pct.2 | p_val_adj |
|---------|----------|-----------|-------|-------|-----------|
| mt-Rnr2 | 1.32E-39 | -0.3833   | 1     | 1     | 2.37E-35  |
| mt-Atp6 | 1.63E-24 | -0.33556  | 1     | 1     | 2.92E-20  |
| Rpl38   | 4.85E-09 | 0.405122  | 0.891 | 0.724 | 8.67E-05  |
| Rpl37a  | 5.13E-09 | 0.3643    | 0.984 | 0.901 | 9.17E-05  |
| Rpl41   | 6.69E-08 | 0.305752  | 0.989 | 0.934 | 0.001195  |
| Rpl37   | 9.65E-06 | 0.268879  | 0.935 | 0.822 | 0.172556  |
| Igfbp3  | 1.00E-05 | -0.2765   | 0.103 | 0.289 | 0.179298  |
| Elk3    | 4.89E-05 | 0.272518  | 0.582 | 0.395 | 0.874185  |
| Tagln2  | 5.02E-05 | -0.25286  | 0.353 | 0.579 | 0.896988  |
| Rpl39   | 9.86E-05 | 0.253692  | 0.837 | 0.691 | 1         |
| Tcf4    | 0.000185 | 0.255576  | 0.957 | 0.947 | 1         |
| Rps24   | 0.000188 | 0.258776  | 0.984 | 0.941 | 1         |
| Zbtb20  | 0.000245 | 0.281329  | 0.864 | 0.776 | 1         |
| Taok1   | 0.000281 | 0.266881  | 0.418 | 0.257 | 1         |
| Macf1   | 0.000511 | 0.287768  | 0.576 | 0.454 | 1         |
| Hbb-bs  | 0.000588 | 0.358408  | 0.397 | 0.237 | 1         |
| Rsad2   | 0.001097 | 0.288035  | 0.761 | 0.658 | 1         |
| Gm42418 | 0.003325 | 0.393057  | 0.989 | 0.954 | 1         |
| Hspa1b  | 0.00801  | 0.469353  | 0.408 | 0.296 | 1         |
| Egr1    | 0.012766 | 0.415081  | 0.261 | 0.158 | 1         |
| Junb    | 0.027079 | 0.251492  | 0.429 | 0.329 | 1         |

## Cluster 9 - Smooth Muscle

|         | p_val    | avg_logFC | pct.1 | pct.2 | p_val_adj |
|---------|----------|-----------|-------|-------|-----------|
| mt-Atp6 | 3.02E-21 | -0.35597  | 1     | 1     | 5.40E-17  |
| mt-Rnr2 | 1.46E-19 | -0.34046  | 1     | 1     | 2.61E-15  |
| mt-Nd2  | 1.86E-18 | -0.25827  | 1     | 1     | 3.32E-14  |
| Rpl41   | 2.44E-14 | 0.369852  | 1     | 0.963 | 4.36E-10  |
| Uba52   | 5.94E-12 | 0.407288  | 0.774 | 0.415 | 1.06E-07  |
| Rpl37a  | 1.36E-11 | 0.368286  | 0.978 | 0.963 | 2.43E-07  |
| Rpl38   | 5.81E-11 | 0.377856  | 0.964 | 0.919 | 1.04E-06  |
| Rpl37   | 4.60E-10 | 0.347734  | 0.978 | 0.941 | 8.23E-06  |
| Rps21   | 1.78E-08 | 0.342492  | 0.993 | 0.978 | 0.000319  |
| Rps29   | 2.12E-08 | 0.333915  | 1     | 0.941 | 0.000378  |
| Rpl27a  | 1.29E-07 | 0.296471  | 0.934 | 0.8   | 0.002301  |
| Rpl30   | 2.97E-07 | 0.322796  | 0.949 | 0.904 | 0.005305  |
| Igfbp5  | 8.14E-07 | 0.411546  | 0.971 | 0.97  | 0.014553  |
| Rpl36   | 9.53E-07 | 0.271274  | 0.949 | 0.948 | 0.017027  |
| Rps26   | 1.70E-06 | 0.259598  | 0.883 | 0.696 | 0.030413  |
| Rpl35a  | 1.86E-06 | 0.304725  | 0.971 | 0.904 | 0.033168  |
| Rpl39   | 3.39E-06 | 0.280008  | 0.985 | 0.956 | 0.060651  |
| mt-Co2  | 8.81E-06 | -0.27915  | 0.985 | 1     | 0.157396  |
| Jund    | 2.00E-05 | 0.428786  | 0.876 | 0.726 | 0.357532  |
| Rplp2   | 2.82E-05 | 0.25123   | 0.942 | 0.956 | 0.504784  |
| Zfp36   | 0.000106 | 0.508096  | 0.504 | 0.311 | 1         |
| Csrp1   | 0.000115 | -0.28731  | 0.861 | 0.948 | 1         |
| Egr1    | 0.000428 | 0.574194  | 0.591 | 0.452 | 1         |
| Jun     | 0.000757 | 0.483085  | 0.628 | 0.452 | 1         |
| Txndc11 | 0.000964 | 0.314773  | 0.299 | 0.141 | 1         |

## Cluster 10 - Endothelial

|         | p_val    | avg_logFC | pct.1 | pct.2 | p_val_adj |
|---------|----------|-----------|-------|-------|-----------|
| mt-Rnr2 | 5.20E-20 | -0.48748  | 1     | 1     | 9.30E-16  |
| mt-Cytb | 2.68E-18 | -0.26639  | 1     | 1     | 4.79E-14  |
| mt-Atp6 | 1.86E-16 | -0.38242  | 1     | 1     | 3.33E-12  |
| mt-Nd2  | 2.32E-16 | -0.31847  | 1     | 1     | 4.15E-12  |
| mt-Nd4  | 6.74E-16 | -0.29807  | 1     | 1     | 1.20E-11  |
| Jun     | 2.32E-10 | 0.490206  | 0.825 | 0.322 | 4.14E-06  |
| Rps29   | 2.81E-06 | 0.505615  | 1     | 1     | 0.050137  |
| Jund    | 4.13E-06 | 0.417621  | 0.881 | 0.456 | 0.073819  |
| Rpl41   | 1.52E-05 | 0.43945   | 1     | 0.989 | 0.27147   |
| Rpl35a  | 1.96E-05 | 0.436839  | 1     | 0.956 | 0.350574  |
| Tpt1    | 2.36E-05 | -0.27895  | 1     | 1     | 0.420991  |
| Rpl38   | 4.17E-05 | 0.567058  | 1     | 0.956 | 0.745554  |
| Fabp4   | 4.82E-05 | -0.31073  | 0.968 | 0.956 | 0.862362  |
| Rps26   | 5.45E-05 | 0.448694  | 0.96  | 0.744 | 0.973437  |
| Rpl37a  | 7.05E-05 | 0.524532  | 1     | 0.978 | 1         |
| Rpl35   | 0.000213 | 0.363198  | 0.976 | 0.822 | 1         |
| Pkp4    | 0.000225 | -0.33061  | 0.19  | 0.433 | 1         |
| Rplp2   | 0.000233 | 0.44156   | 1     | 0.867 | 1         |
| Rps28   | 0.000296 | 0.478633  | 0.746 | 0.567 | 1         |
| Cox7a2l | 0.000341 | -0.30538  | 0.278 | 0.522 | 1         |
| Rpl37   | 0.000531 | 0.522956  | 1     | 0.967 | 1         |
| Rpl39   | 0.000693 | 0.492775  | 0.992 | 0.933 | 1         |
| Cd300lg | 0.000844 | -0.31004  | 0.397 | 0.6   | 1         |
| Mrpl33  | 0.000925 | 0.281072  | 0.278 | 0.1   | 1         |
| Rps21   | 0.00116  | 0.547199  | 1     | 1     | 1         |

## Cluster 11 - Glial

|           | p_val    | avg_logFC | pct.1 | pct.2 | p_val_adj |
|-----------|----------|-----------|-------|-------|-----------|
| mt-Rnr2   | 5.70E-21 | -0.32675  | 1     | 1     | 1.02E-16  |
| mt-Nd2    | 8.33E-21 | -0.26736  | 1     | 1     | 1.49E-16  |
| mt-Atp6   | 3.08E-19 | -0.40067  | 1     | 1     | 5.50E-15  |
| Rpl41     | 1.09E-08 | 0.443985  | 0.993 | 0.932 | 0.000195  |
| mt-Co2    | 5.17E-06 | -0.25967  | 1     | 1     | 0.092315  |
| Kcna1     | 0.000238 | 0.276433  | 0.97  | 0.959 | 1         |
| Rpsa      | 0.000239 | -0.25961  | 0.896 | 0.973 | 1         |
| Ldhd      | 0.000462 | -0.26478  | 0.778 | 0.849 | 1         |
| Nr4a2     | 0.000565 | 0.455903  | 0.785 | 0.63  | 1         |
| Egr1      | 0.000607 | 0.676271  | 0.563 | 0.356 | 1         |
| Stat3     | 0.000886 | 0.308194  | 0.4   | 0.192 | 1         |
| Jund      | 0.001097 | 0.316992  | 0.867 | 0.726 | 1         |
| Secisbp2l | 0.001104 | 0.267158  | 0.97  | 0.973 | 1         |
| Igfbp5    | 0.001773 | 0.529835  | 0.837 | 0.753 | 1         |
| Zfp36     | 0.002124 | 0.671284  | 0.444 | 0.26  | 1         |
| Hba-a1    | 0.004541 | 1.823354  | 0.104 | 0     | 1         |
| Nr4a1     | 0.006153 | 0.400619  | 0.541 | 0.411 | 1         |
| Klf9      | 0.006454 | 0.322678  | 0.519 | 0.342 | 1         |
| Lgals1    | 0.011841 | -0.26817  | 0.837 | 0.89  | 1         |
| Fabp4     | 0.015126 | 0.343323  | 0.541 | 0.37  | 1         |
| Kcnq1ot1  | 0.019587 | 0.334265  | 0.474 | 0.329 | 1         |
| Irf1      | 0.030737 | 0.370468  | 0.237 | 0.123 | 1         |
| Hbb-bs    | 0.033784 | 2.836494  | 0.407 | 0.288 | 1         |
| Fosb      | 0.036131 | 0.304596  | 0.348 | 0.205 | 1         |
| Phlda1    | 0.038391 | 0.312286  | 0.444 | 0.301 | 1         |

## Cluster 12 - Endothelial

| p_val | avg_logFC | pct.1 | pct.2 | p_val_adj |
|-------|-----------|-------|-------|-----------|
|-------|-----------|-------|-------|-----------|

## Cluster 13 - Endothelial

| p_val | avg_logFC | pct.1 | pct.2 | p_val_adj |
|-------|-----------|-------|-------|-----------|
|-------|-----------|-------|-------|-----------|

|         |          |          |       |       |          |
|---------|----------|----------|-------|-------|----------|
| Rplp2   | 2.78E-08 | 0.346425 | 0.989 | 0.986 | 0.000498 |
| mt-Rnr2 | 9.00E-08 | -0.29674 | 1     | 1     | 0.001608 |
| Rpl41   | 5.54E-07 | 0.336732 | 1     | 1     | 0.009909 |
| Rpl38   | 8.52E-07 | 0.308279 | 0.989 | 0.986 | 0.015231 |
| mt-Atp6 | 2.53E-06 | -0.26895 | 1     | 1     | 0.045233 |
| Snrpg   | 1.21E-05 | 0.311814 | 0.759 | 0.406 | 0.216164 |
| Rps26   | 1.55E-05 | 0.324821 | 0.977 | 0.913 | 0.276752 |
| Rps28   | 2.70E-05 | 0.312085 | 0.943 | 0.884 | 0.482337 |
| Cyba    | 3.81E-05 | -0.27221 | 0.115 | 0.391 | 0.681788 |
| Rpl39   | 4.44E-05 | 0.256376 | 1     | 1     | 0.793484 |
| Malat1  | 6.66E-05 | 0.364676 | 0.989 | 1     | 1        |
| Rpl36al | 0.000219 | 0.269268 | 0.69  | 0.391 | 1        |
| Eng     | 0.00025  | -0.29389 | 0.885 | 0.942 | 1        |
| Cd9     | 0.000695 | -0.30616 | 0.839 | 0.957 | 1        |
| Ncl     | 0.000714 | 0.273124 | 0.655 | 0.406 | 1        |
| Ctla2a  | 0.001191 | -0.39452 | 0.759 | 0.855 | 1        |
| Lmo1    | 0.001429 | -0.28587 | 0.391 | 0.594 | 1        |
| Klf7    | 0.002099 | 0.330079 | 0.701 | 0.507 | 1        |
| Tmsb10  | 0.002253 | 0.312999 | 0.908 | 0.884 | 1        |
| Slc38a2 | 0.002662 | 0.375085 | 0.678 | 0.493 | 1        |
| Sec61b  | 0.002836 | 0.254425 | 0.655 | 0.449 | 1        |
| Ctsh    | 0.002918 | -0.33905 | 0.195 | 0.391 | 1        |
| Col15a1 | 0.002952 | 0.308669 | 0.644 | 0.406 | 1        |
| Lrg1    | 0.003993 | 0.251808 | 0.92  | 0.942 | 1        |
| Zbtb20  | 0.00403  | 0.254679 | 0.828 | 0.71  | 1        |

## Cluster 14 - Macrophage

|         | p_val    | avg_logFC | pct.1 | pct.2 | p_val_adj |
|---------|----------|-----------|-------|-------|-----------|
| mt-Atp6 | 9.85E-10 | -0.30715  | 1     | 1     | 1.76E-05  |
| Ccl24   | 5.03E-08 | -0.83146  | 0.116 | 0.567 | 0.000899  |
| Gm28438 | 5.21E-08 | -0.28466  | 1     | 1     | 0.000931  |
| Uba52   | 8.93E-08 | 0.534055  | 0.812 | 0.433 | 0.001595  |
| Cd52    | 1.04E-07 | 0.776118  | 0.884 | 0.463 | 0.001867  |
| Gas6    | 1.33E-07 | -0.84138  | 0.246 | 0.642 | 0.002368  |
| Ednrb   | 1.95E-07 | -0.84905  | 0.072 | 0.478 | 0.00349   |
| Pmp22   | 2.84E-07 | -0.60538  | 0.232 | 0.612 | 0.005081  |
| Serinc3 | 3.19E-07 | -0.62506  | 0.551 | 0.881 | 0.005702  |
| Igfbp4  | 3.86E-07 | -0.65011  | 0.217 | 0.627 | 0.0069    |
| Folr2   | 4.66E-07 | -0.87098  | 0.145 | 0.537 | 0.008329  |
| Selenop | 5.39E-07 | -1.07166  | 0.464 | 0.791 | 0.009638  |
| Fxyd2   | 6.15E-07 | -0.78008  | 0.101 | 0.463 | 0.010986  |
| Ctsb    | 8.12E-07 | -0.60008  | 0.957 | 0.955 | 0.014509  |
| Pltp    | 1.04E-06 | -0.751    | 0.362 | 0.731 | 0.018634  |
| F13a1   | 1.93E-06 | -0.94153  | 0.565 | 0.791 | 0.034566  |
| Ccl6    | 2.33E-06 | -0.54786  | 0.681 | 0.881 | 0.041613  |
| Fcna    | 2.58E-06 | -0.52531  | 0.058 | 0.403 | 0.046187  |
| C4b     | 2.86E-06 | -0.77942  | 0.13  | 0.493 | 0.05114   |
| Tmsb10  | 4.50E-06 | 1.03348   | 0.725 | 0.433 | 0.080401  |
| Retnla  | 4.66E-06 | -1.38791  | 0.159 | 0.507 | 0.083274  |
| Lyve1   | 6.25E-06 | -0.70612  | 0.116 | 0.463 | 0.11165   |
| Glul    | 6.36E-06 | -0.57174  | 0.29  | 0.642 | 0.11368   |
| Snx2    | 7.14E-06 | -0.43164  | 0.377 | 0.731 | 0.127622  |
| Fgfr1   | 9.82E-06 | -0.44339  | 0.101 | 0.433 | 0.175445  |

## Cluster 15 - Pericyte

|         | p_val    | avg_logFC | pct.1 | pct.2 | p_val_adj |
|---------|----------|-----------|-------|-------|-----------|
| mt-Rnr2 | 8.07E-13 | -0.35478  | 1     | 1     | 1.44E-08  |
| mt-Nd4  | 9.70E-12 | -0.2687   | 1     | 1     | 1.73E-07  |
| mt-Atp6 | 7.61E-11 | -0.44075  | 1     | 1     | 1.36E-06  |
| mt-Nd2  | 1.77E-10 | -0.25653  | 1     | 1     | 3.17E-06  |
| Rpl37a  | 4.92E-06 | 0.342441  | 0.989 | 1     | 0.087918  |
| Rpl35a  | 9.59E-06 | 0.399968  | 0.989 | 0.946 | 0.171485  |
| Gm28438 | 1.55E-05 | -0.28048  | 1     | 1     | 0.27762   |
| Rpl41   | 2.64E-05 | 0.347401  | 1     | 0.973 | 0.472272  |
| Sh3glb1 | 0.000106 | 0.369989  | 0.835 | 0.595 | 1         |
| Clic1   | 0.000153 | -0.31078  | 0.484 | 0.838 | 1         |
| Ccdc28b | 0.000246 | -0.29695  | 0.165 | 0.459 | 1         |
| Rps28   | 0.000276 | 0.352821  | 0.813 | 0.622 | 1         |
| Rpl38   | 0.000364 | 0.274326  | 1     | 0.919 | 1         |
| Rpl39   | 0.000692 | 0.310621  | 0.978 | 0.919 | 1         |
| Aldh2   | 0.000737 | -0.26714  | 0.78  | 0.973 | 1         |
| Atp5l   | 0.000848 | 0.300453  | 0.725 | 0.459 | 1         |
| Rps26   | 0.000871 | 0.308189  | 0.835 | 0.622 | 1         |
| Ywhab   | 0.000982 | 0.338433  | 0.758 | 0.541 | 1         |
| Rpl31   | 0.001276 | 0.274794  | 0.758 | 0.541 | 1         |
| S100a6  | 0.001399 | 0.372559  | 1     | 0.919 | 1         |
| Chmp2a  | 0.001438 | 0.277261  | 0.67  | 0.378 | 1         |
| Cox6c   | 0.00166  | 0.273706  | 0.857 | 0.757 | 1         |
| Igfbp5  | 0.001681 | 0.476691  | 0.549 | 0.27  | 1         |
| Prrc2c  | 0.001814 | 0.25476   | 0.659 | 0.351 | 1         |
| Icam2   | 0.002257 | 0.264629  | 0.473 | 0.189 | 1         |



## Cluster 16 - Glial

|         | p_val    | avg_logFC | pct.1 | pct.2 | p_val_adj |
|---------|----------|-----------|-------|-------|-----------|
| mt-Rnr2 | 5.66E-13 | -0.40592  | 1     | 1     | 1.01E-08  |
| mt-Atp6 | 3.74E-11 | -0.4623   | 1     | 1     | 6.69E-07  |
| mt-Nd4  | 2.77E-10 | -0.25597  | 1     | 1     | 4.96E-06  |
| Rps29   | 1.50E-05 | 0.365049  | 1     | 1     | 0.268589  |
| Elob    | 1.79E-05 | 0.446478  | 0.855 | 0.59  | 0.320299  |
| Gm28438 | 2.02E-05 | -0.2573   | 1     | 1     | 0.361778  |
| Tmsb10  | 0.000128 | 0.45638   | 0.789 | 0.513 | 1         |
| Rpl22   | 0.000232 | 0.294239  | 0.934 | 0.769 | 1         |
| Rpl41   | 0.000337 | 0.324071  | 1     | 0.974 | 1         |
| Ddx6    | 0.000454 | 0.390619  | 0.579 | 0.282 | 1         |
| Hspg2   | 0.000512 | 0.38265   | 0.526 | 0.179 | 1         |
| Rps12   | 0.000579 | 0.314439  | 1     | 0.949 | 1         |
| Rpl37   | 0.001003 | 0.28656   | 1     | 0.974 | 1         |
| Efs     | 0.001025 | 0.310813  | 0.421 | 0.128 | 1         |
| Rpl35a  | 0.001192 | 0.295308  | 0.987 | 0.974 | 1         |
| Acta1   | 0.00122  | -0.43455  | 0.237 | 0.538 | 1         |
| Hdlbp   | 0.001663 | 0.294865  | 0.474 | 0.179 | 1         |
| Lyz2    | 0.001791 | -1.18339  | 0.645 | 0.718 | 1         |
| Ripk1   | 0.001794 | 0.310813  | 0.382 | 0.103 | 1         |
| Plp1    | 0.002093 | 0.363387  | 0.947 | 0.897 | 1         |
| Rps21   | 0.002104 | 0.265558  | 1     | 0.974 | 1         |
| Timp3   | 0.002297 | 0.502499  | 0.803 | 0.641 | 1         |
| Clic4   | 0.002811 | 0.297909  | 0.671 | 0.385 | 1         |
| Fbln5   | 0.002821 | -0.27895  | 0.329 | 0.641 | 1         |
| Rpl37a  | 0.003139 | 0.263934  | 1     | 0.923 | 1         |

## Cluster 17 - Unknown

|          | p_val    | avg_logFC | pct.1 | pct.2 | p_val_adj |
|----------|----------|-----------|-------|-------|-----------|
| Rpl41    | 0.000613 | 0.568529  | 0.864 | 0.548 | 1         |
| Ubc      | 0.000683 | 0.630415  | 0.559 | 0.226 | 1         |
| Rps17    | 0.000698 | 0.417322  | 0.492 | 0.129 | 1         |
| Ube2o    | 0.001122 | -0.2978   | 0.102 | 0.387 | 1         |
| Cd24a    | 0.001381 | -0.33068  | 0.102 | 0.387 | 1         |
| Lars2    | 0.001684 | 0.370802  | 0.339 | 0.032 | 1         |
| Rps19    | 0.001793 | 0.599312  | 0.661 | 0.323 | 1         |
| Tmsb10   | 0.002071 | 0.368051  | 0.525 | 0.161 | 1         |
| Fus      | 0.002136 | 0.399492  | 0.458 | 0.129 | 1         |
| Rps29    | 0.002209 | 0.610715  | 0.831 | 0.516 | 1         |
| Tnfrsf1a | 0.002338 | 0.266268  | 0.254 | 0     | 1         |
| Rps27    | 0.002443 | 0.660914  | 0.712 | 0.387 | 1         |
| Arhgef15 | 0.002515 | 0.396222  | 0.407 | 0.097 | 1         |
| Alas2    | 0.002795 | -0.50851  | 0.593 | 0.774 | 1         |
| H2-D1    | 0.002915 | 0.609213  | 0.712 | 0.484 | 1         |
| Rps20    | 0.003031 | 0.416348  | 0.763 | 0.355 | 1         |
| Rps21    | 0.003089 | 0.443228  | 0.763 | 0.355 | 1         |
| Atp5j    | 0.003811 | 0.393974  | 0.576 | 0.258 | 1         |
| Rpl9     | 0.003846 | 0.391346  | 0.746 | 0.419 | 1         |
| Rpl13    | 0.003881 | 0.50407   | 0.729 | 0.355 | 1         |
| Sf3b1    | 0.004533 | 0.289738  | 0.39  | 0.097 | 1         |
| Ablim3   | 0.004695 | 0.294719  | 0.39  | 0.097 | 1         |
| Mgll     | 0.004755 | 0.469451  | 0.593 | 0.355 | 1         |
| Aplp2    | 0.004813 | 0.569472  | 0.525 | 0.258 | 1         |
| Rpl22l1  | 0.004824 | 0.278439  | 0.39  | 0.097 | 1         |

## Cluster 18 - Tendon

|         | p_val    | avg_logFC | pct.1 | pct.2 | p_val_adj |
|---------|----------|-----------|-------|-------|-----------|
| mt-Atp6 | 3.94E-09 | -0.38854  | 1     | 1     | 7.05E-05  |
| mt-Rnr2 | 5.19E-07 | -0.30249  | 1     | 1     | 0.009278  |
| Ccn2    | 0.000102 | -0.7513   | 0.426 | 0.8   | 1         |
| Rpl37a  | 0.000162 | 0.392039  | 1     | 0.971 | 1         |
| Hdac1   | 0.000206 | -0.26501  | 0.074 | 0.4   | 1         |
| Gng5    | 0.000213 | 0.332271  | 0.796 | 0.4   | 1         |
| Dleu2   | 0.000256 | 0.474286  | 0.667 | 0.257 | 1         |
| Cast    | 0.00027  | 0.36871   | 0.481 | 0.114 | 1         |
| Gm28438 | 0.000514 | -0.26079  | 1     | 1     | 1         |
| Arl5b   | 0.000754 | -0.25131  | 0.093 | 0.4   | 1         |
| Rps28   | 0.000804 | 0.425375  | 0.981 | 0.914 | 1         |
| Rps8    | 0.001086 | 0.255336  | 1     | 0.971 | 1         |
| Rpl39   | 0.001193 | 0.309743  | 1     | 0.971 | 1         |
| Dok1    | 0.001205 | -0.29305  | 0.13  | 0.429 | 1         |
| Cct8    | 0.001287 | -0.27199  | 0.204 | 0.543 | 1         |
| Fau     | 0.001388 | 0.254645  | 1     | 1     | 1         |
| Actb    | 0.001974 | 0.411918  | 0.963 | 0.943 | 1         |
| Selenok | 0.002164 | -0.29437  | 0.63  | 0.8   | 1         |
| Tmem204 | 0.002252 | -0.31175  | 0.13  | 0.4   | 1         |
| Rps29   | 0.003096 | 0.266766  | 1     | 1     | 1         |
| Ifitm3  | 0.003293 | 0.646893  | 0.833 | 0.686 | 1         |
| Rps21   | 0.003542 | 0.261683  | 1     | 0.971 | 1         |
| Rpl38   | 0.00388  | 0.312899  | 0.981 | 0.943 | 1         |
| Bgn     | 0.003896 | -0.36121  | 0.907 | 0.943 | 1         |
| Zfand5  | 0.004142 | 0.284204  | 0.426 | 0.143 | 1         |

## Cluster 19 - Neutrophil

|           | p_val    | avg_logFC | pct.1 | pct.2 | p_val_adj |
|-----------|----------|-----------|-------|-------|-----------|
| mt-Nd2    | 1.08E-07 | -0.27891  | 1     | 1     | 0.001933  |
| mt-Rnr2   | 1.45E-06 | -0.28701  | 1     | 1     | 0.025922  |
| mt-Atp6   | 2.24E-05 | -0.3548   | 1     | 1     | 0.399489  |
| Tgm2      | 0.000978 | 0.70415   | 0.532 | 0.136 | 1         |
| Ccr12     | 0.001559 | 0.978852  | 0.574 | 0.182 | 1         |
| Snx20     | 0.002056 | 0.486489  | 0.83  | 0.636 | 1         |
| Srgn      | 0.002148 | 0.439113  | 1     | 1     | 1         |
| Lamp1     | 0.003019 | -0.34513  | 0.17  | 0.545 | 1         |
| Med31     | 0.003482 | -0.35364  | 0.085 | 0.364 | 1         |
| Ubc       | 0.003515 | 0.529264  | 0.936 | 0.818 | 1         |
| H2-T23    | 0.003598 | 0.437146  | 0.511 | 0.136 | 1         |
| Marcks    | 0.003603 | 0.573346  | 0.894 | 0.727 | 1         |
| Fmnl1     | 0.003877 | 0.378728  | 0.489 | 0.136 | 1         |
| 1810013L2 | 0.003911 | -0.29302  | 0.085 | 0.364 | 1         |
| Ddx3x     | 0.004749 | 0.453917  | 0.66  | 0.318 | 1         |
| Malat1    | 0.005279 | 0.279403  | 1     | 1     | 1         |
| Sgms2     | 0.00544  | 0.404046  | 0.574 | 0.182 | 1         |
| Atp6v1a   | 0.00566  | 0.324908  | 0.362 | 0.045 | 1         |
| Samsn1    | 0.006412 | 0.488353  | 0.851 | 0.682 | 1         |
| Trib1     | 0.006977 | 0.542848  | 0.681 | 0.409 | 1         |
| Cpeb2     | 0.007063 | 0.453917  | 0.277 | 0     | 1         |
| Tnf       | 0.007152 | 0.928976  | 0.277 | 0     | 1         |
| Clec4d    | 0.007535 | 0.42359   | 0.957 | 0.818 | 1         |
| Fth1      | 0.007831 | 0.68478   | 1     | 1     | 1         |
| Slc25a33  | 0.007918 | 0.378728  | 0.426 | 0.091 | 1         |

## Cluster 20 - T Cell

|           | p_val    | avg_logFC | pct.1 | pct.2 | p_val_adj |
|-----------|----------|-----------|-------|-------|-----------|
| mt-Rnr2   | 8.51E-06 | -0.4233   | 1     | 1     | 0.152119  |
| mt-Nd4    | 2.46E-05 | -0.2555   | 1     | 1     | 0.439652  |
| mt-Nd2    | 6.37E-05 | -0.25549  | 1     | 1     | 1         |
| mt-Atp6   | 0.000458 | -0.35215  | 1     | 1     | 1         |
| Dynlrb1   | 0.000782 | -0.41276  | 0.04  | 0.5   | 1         |
| Tram1     | 0.000937 | -0.37502  | 0.08  | 0.571 | 1         |
| Gm28438   | 0.000973 | -0.35351  | 1     | 1     | 1         |
| Adh5      | 0.002818 | -0.36624  | 0.04  | 0.429 | 1         |
| Fosl2     | 0.002853 | 0.672944  | 0.76  | 0.286 | 1         |
| Atp6v0e   | 0.003993 | -0.39058  | 0.12  | 0.571 | 1         |
| Tdrp      | 0.004243 | 0.392042  | 0.44  | 0     | 1         |
| Trp53inp1 | 0.004363 | -0.3285   | 0.04  | 0.429 | 1         |
| Peak1     | 0.005404 | -0.35667  | 0.2   | 0.643 | 1         |
| Smarca5   | 0.005748 | 0.454255  | 0.6   | 0.143 | 1         |
| Tmx4      | 0.005834 | -0.25131  | 0     | 0.286 | 1         |
| Mbd6      | 0.005834 | -0.25131  | 0     | 0.286 | 1         |
| Ten1      | 0.005834 | -0.25131  | 0     | 0.286 | 1         |
| Hist1h1c  | 0.005834 | -0.25131  | 0     | 0.286 | 1         |
| Polr2f    | 0.005834 | -0.25131  | 0     | 0.286 | 1         |
| Cd320     | 0.005834 | -0.25131  | 0     | 0.286 | 1         |
| Mrpl43    | 0.005834 | -0.25131  | 0     | 0.286 | 1         |
| Gm12216   | 0.005889 | -0.30538  | 0     | 0.286 | 1         |
| Ammecr1l  | 0.005889 | -0.30538  | 0     | 0.286 | 1         |
| Oaz1      | 0.006688 | 0.570087  | 0.96  | 0.786 | 1         |
| Fbxo33    | 0.007387 | 0.364643  | 0.4   | 0     | 1         |

## Cluster 21 - B Cell

|           | p_val    | avg_logFC | pct.1 | pct.2 | p_val_adj |
|-----------|----------|-----------|-------|-------|-----------|
| mt-Rnr2   | 4.99E-05 | -0.38594  | 1     | 1     | 0.891713  |
| Rpl17     | 0.001248 | -0.37537  | 1     | 1     | 1         |
| mt-Atp6   | 0.001317 | -0.35187  | 1     | 1     | 1         |
| Slc25a3   | 0.001993 | -0.56885  | 0.292 | 0.786 | 1         |
| Polr2c    | 0.00211  | -0.30538  | 0     | 0.357 | 1         |
| Snrpd1    | 0.00211  | -0.30538  | 0     | 0.357 | 1         |
| Nedd8     | 0.002635 | -0.46204  | 0.125 | 0.571 | 1         |
| Gm42031   | 0.003488 | -0.36464  | 0.042 | 0.429 | 1         |
| Dpy30     | 0.003488 | -0.36464  | 0.042 | 0.429 | 1         |
| Rb1cc1    | 0.003811 | 0.538562  | 0.625 | 0.143 | 1         |
| Kdm7a     | 0.004434 | 0.441833  | 0.542 | 0.071 | 1         |
| Nsmce4a   | 0.006052 | 0.377294  | 0.417 | 0     | 1         |
| Lman2l    | 0.006867 | -0.25131  | 0     | 0.286 | 1         |
| Rsu1      | 0.006867 | -0.25131  | 0     | 0.286 | 1         |
| Rsrc1     | 0.006867 | -0.25131  | 0     | 0.286 | 1         |
| Rbmxl1    | 0.006867 | -0.25131  | 0     | 0.286 | 1         |
| C920009B1 | 0.006867 | -0.25131  | 0     | 0.286 | 1         |
| Gtf2h2    | 0.006867 | -0.25131  | 0     | 0.286 | 1         |
| Apex1     | 0.006867 | -0.25131  | 0     | 0.286 | 1         |
| Lpin2     | 0.006932 | -0.30538  | 0     | 0.286 | 1         |
| Ubb       | 0.00836  | -0.42721  | 0.958 | 1     | 1         |
| Kmt2e     | 0.010272 | 0.44682   | 0.875 | 0.571 | 1         |
| Rp9       | 0.010519 | 0.377294  | 0.375 | 0     | 1         |
| Dpm3      | 0.010519 | 0.348307  | 0.375 | 0     | 1         |
| Fam133b   | 0.010519 | 0.348307  | 0.375 | 0     | 1         |

## Cluster 22 - Unknown

|         | p_val    | avg_logFC | pct.1 | pct.2 | p_val_adj |
|---------|----------|-----------|-------|-------|-----------|
| Pcbp1   | 8.10E-05 | 0.575364  | 0.611 | 0     | 1         |
| Mrps14  | 0.000124 | 0.459532  | 0.667 | 0.053 | 1         |
| mt-Atp6 | 0.000142 | -0.58868  | 1     | 1     | 1         |
| mt-Cytb | 0.000222 | -0.27054  | 1     | 1     | 1         |
| mt-Nd2  | 0.000663 | -0.40789  | 1     | 1     | 1         |
| Gsn     | 0.000689 | -0.65076  | 1     | 1     | 1         |
| Il11ra1 | 0.000809 | -0.56497  | 0.333 | 0.895 | 1         |
| mt-Rnr2 | 0.000923 | -0.47909  | 1     | 1     | 1         |
| Rpn1    | 0.000976 | 0.492322  | 0.556 | 0.053 | 1         |
| Nop10   | 0.000984 | 0.489385  | 0.667 | 0.105 | 1         |
| Fam53b  | 0.001    | -0.38777  | 0     | 0.474 | 1         |
| Ppp2r2d | 0.001046 | -0.42286  | 0     | 0.474 | 1         |
| mt-Nd4  | 0.001341 | -0.33688  | 1     | 1     | 1         |
| Rpl41   | 0.001581 | 0.397319  | 1     | 1     | 1         |
| Rpl38   | 0.002785 | 0.492322  | 1     | 0.895 | 1         |
| Mrps15  | 0.003124 | 0.328504  | 0.389 | 0     | 1         |
| Sel1l   | 0.003124 | 0.328504  | 0.389 | 0     | 1         |
| Eif5a   | 0.003129 | 0.372521  | 0.889 | 0.632 | 1         |
| Taf9b   | 0.003205 | 0.367725  | 0.389 | 0     | 1         |
| Ppdpf   | 0.00326  | 0.405465  | 0.389 | 0     | 1         |
| Gna11   | 0.003327 | 0.443532  | 0.556 | 0.105 | 1         |
| Copb2   | 0.004158 | 0.341749  | 0.556 | 0.105 | 1         |
| Matr3   | 0.004397 | 0.372521  | 0.722 | 0.263 | 1         |
| Sec11c  | 0.004844 | 0.364222  | 0.611 | 0.158 | 1         |
| Cwc15   | 0.005363 | 0.330321  | 0.611 | 0.158 | 1         |
