# Supplementary material
Source: PubMed Central journal article supplement (PMC9492804)
Supplement: NIHMS1791440-supplement-tS3A.pdf [file NIHMS1791440-supplement-tS3A.pdf]

## All Proteins

| Accession Number | Entry name  | Protein names                                                                                                                                                                                             |
|------------------|-------------|-----------------------------------------------------------------------------------------------------------------------------------------------------------------------------------------------------------|
| Q9DAK9           | PHP14_MOUSE | 14 kDa phosphohistidine phosphatase (EC 3.9.1.3) (Phosphohistidine phosphatase 1) (PHPT1) (Protein histidine phosphatase) (PHP)                                                                           |
| Q9CQV8           | 1433B_MOUSE | 14-3-3 protein beta/alpha (Protein kinase C inhibitor protein 1) (KCIP-1) [Cleaved into: 14-3-3 protein beta/alpha, N-terminally processed]                                                               |
| P62259           | 1433E_MOUSE | 14-3-3 protein epsilon (14-3-3E)                                                                                                                                                                          |
| P68510           | 1433F_MOUSE | 14-3-3 protein eta                                                                                                                                                                                        |
| P61982           | 1433G_MOUSE | 14-3-3 protein gamma [Cleaved into: 14-3-3 protein gamma, N-terminally processed]                                                                                                                         |
| P68254           | 1433T_MOUSE | 14-3-3 protein theta (14-3-3 protein tau)                                                                                                                                                                 |
| P63101           | 1433Z_MOUSE | 14-3-3 protein zeta/delta (Protein kinase C inhibitor protein 1) (KCIP-1) (SEZ-2)                                                                                                                         |
| Q8CIH5           | PLCG2_MOUSE | 1-phosphatidylinositol 4,5-bisphosphate phosphodiesterase gamma-2 (EC 3.1.4.11) (Phosphoinositide phospholipase C-gamma-2) (Phospholipase C-gamma-2) (PLC-gamma-2)                                        |
| Q8BG32           | PSD11_MOUSE | 26S proteasome non-ATPase regulatory subunit 11 (26S proteasome regulatory subunit RPN6) (26S proteasome regulatory subunit S9) (26S proteasome regulatory subunit p44.5)                                 |
| Q9D8W5           | PSD12_MOUSE | 26S proteasome non-ATPase regulatory subunit 12 (26S proteasome regulatory subunit RPN5) (26S proteasome regulatory subunit p55)                                                                          |
| O35593           | PSDE_MOUSE  | 26S proteasome non-ATPase regulatory subunit 14 (EC 3.4.19.-) (26S proteasome regulatory subunit RPN11) (MAD1)                                                                                            |
| Q8VDM4           | PSMD2_MOUSE | 26S proteasome non-ATPase regulatory subunit 2 (26S proteasome regulatory subunit RPN1) (26S proteasome regulatory subunit S2) (26S proteasome subunit p97)                                               |
| P14685           | PSMD3_MOUSE | 26S proteasome non-ATPase regulatory subunit 3 (26S proteasome regulatory subunit RPN3) (26S proteasome regulatory subunit S3) (Proteasome subunit p58) (Transplantation antigen P91A) (Tum-P91A antigen) |
| Q99JI4           | PSMD6_MOUSE | 26S proteasome non-ATPase regulatory subunit 6 (26S proteasome regulatory subunit RPN7) (26S proteasome regulatory subunit S10) (p42A)                                                                    |

|        |             |                                                                                                                                                                                             |
|--------|-------------|---------------------------------------------------------------------------------------------------------------------------------------------------------------------------------------------|
| P26516 | PSMD7_MOUSE | 26S proteasome non-ATPase regulatory subunit 7 (26S proteasome regulatory subunit RPN8) (26S proteasome regulatory subunit S12) (Mov34 protein) (Proteasome subunit p40)                    |
| P62334 | PRS10_MOUSE | 26S proteasome regulatory subunit 10B (26S proteasome AAA-ATPase subunit RPT4) (Proteasome 26S subunit ATPase 6) (Proteasome subunit p42)                                                   |
| O88685 | PRS6A_MOUSE | 26S proteasome regulatory subunit 6A (26S proteasome AAA-ATPase subunit RPT5) (Proteasome 26S subunit ATPase 3) (Tat-binding protein 1) (TBP-1)                                             |
| P54775 | PRS6B_MOUSE | 26S proteasome regulatory subunit 6B (26S proteasome AAA-ATPase subunit RPT3) (CIP21) (MB67-interacting protein) (MIP224) (Proteasome 26S subunit ATPase 4) (Tat-binding protein 7) (TBP-7) |
| P46471 | PRS7_MOUSE  | 26S proteasome regulatory subunit 7 (26S proteasome AAA-ATPase subunit RPT1) (Proteasome 26S subunit ATPase 2) (Protein MSS1)                                                               |
| Q8BH00 | AL8A1_MOUSE | 2-aminomuconic semialdehyde dehydrogenase (EC 1.2.1.32) (Aldehyde dehydrogenase family 8 member A1) (Retinal dehydrogenase 4)                                                               |
| Q78JT3 | 3HAO_MOUSE  | 3-hydroxyanthranilate 3,4-dioxygenase (EC 1.13.11.6) (3-hydroxyanthranilate oxygenase) (3-HAO)                                                                                              |
| P63325 | RS10_MOUSE  | (3-hydroxyanthranilic acid dioxygenase) (HAD)                                                                                                                                               |
| P62281 | RS11_MOUSE  | 40S ribosomal protein S10                                                                                                                                                                   |
| P62843 | RS15_MOUSE  | 40S ribosomal protein S11                                                                                                                                                                   |
| P14131 | RS16_MOUSE  | 40S ribosomal protein S15 (RIG protein)                                                                                                                                                     |
| P63276 | RS17_MOUSE  | 40S ribosomal protein S16                                                                                                                                                                   |
| P62270 | RS18_MOUSE  | 40S ribosomal protein S17                                                                                                                                                                   |
| P25444 | RS2_MOUSE   | 40S ribosomal protein S18 (Ke-3) (Ke3)                                                                                                                                                      |
| P62908 | RS3_MOUSE   | 40S ribosomal protein S2 (40S ribosomal protein S4) (Protein LLRep3)                                                                                                                        |
| P97351 | RS3A_MOUSE  | 40S ribosomal protein S3 (EC 4.2.99.18)                                                                                                                                                     |
| P62702 | RS4X_MOUSE  | 40S ribosomal protein S3a (Protein TU-11)                                                                                                                                                   |
| P62242 | RS8_MOUSE   | 40S ribosomal protein S4, X isoform                                                                                                                                                         |
| Q6ZWN5 | RS9_MOUSE   | 40S ribosomal protein S8                                                                                                                                                                    |
|        |             | 40S ribosomal protein S9                                                                                                                                                                    |

|        |             |                                                                                                                                                                                                                                                                 |
|--------|-------------|-----------------------------------------------------------------------------------------------------------------------------------------------------------------------------------------------------------------------------------------------------------------|
| P14206 | RSSA_MOUSE  | 40S ribosomal protein SA (37 kDa laminin receptor precursor) (37LRP) (37 kDa oncofetal antigen) (37/67 kDa laminin receptor) (LRP/LR) (67 kDa laminin receptor) (67LR) (Laminin receptor 1) (LamR) (Laminin-binding protein precursor p40) (LBP/p40) (OFA/iLRP) |
| P49429 | HPPD_MOUSE  | 4-hydroxyphenylpyruvate dioxygenase (EC 1.13.11.27) (4-hydroxyphenylpyruvic acid oxidase) (4HPPD) (HPD) (HPPDase) (F Alloantigen) (F protein)                                                                                                                   |
| Q9JLJ2 | AL9A1_MOUSE | 4-trimethylaminobutyraldehyde dehydrogenase (TMABA-DH) (TMABADH) (EC 1.2.1.47) (Aldehyde dehydrogenase family 9 member A1) (EC 1.2.1.3)                                                                                                                         |
| P14869 | RLA0_MOUSE  | 60S acidic ribosomal protein P0 (60S ribosomal protein L10E)                                                                                                                                                                                                    |
| P53026 | RL10A_MOUSE | 60S ribosomal protein L10a (CSA-19) (Neural precursor cell expressed developmentally down-regulated protein 6) (NEDD-6)                                                                                                                                         |
| Q9CXW4 | RL11_MOUSE  | 60S ribosomal protein L11                                                                                                                                                                                                                                       |
| P47962 | RL5_MOUSE   | 60S ribosomal protein L5                                                                                                                                                                                                                                        |
| P14148 | RL7_MOUSE   | 60S ribosomal protein L7                                                                                                                                                                                                                                        |
| P62918 | RL8_MOUSE   | 60S ribosomal protein L8                                                                                                                                                                                                                                        |
| Q9DCD0 | 6PGD_MOUSE  | 6-phosphogluconate dehydrogenase, decarboxylating (EC 1.1.1.44)                                                                                                                                                                                                 |
| Q811B3 | ATS12_MOUSE | A disintegrin and metalloproteinase with thrombospondin motifs 12 (ADAM-TS 12) (ADAM-TS12) (ADAMTS-12) (EC 3.4.24.-)                                                                                                                                            |
| Q8CAY6 | THIC_MOUSE  | Acetyl-CoA acetyltransferase, cytosolic (EC 2.3.1.9) (Cytosolic acetoacetyl-CoA thiolase)                                                                                                                                                                       |
| P68033 | ACTC_MOUSE  | Actin, alpha cardiac muscle 1 (Alpha-cardiac actin) [Cleaved into: Actin, alpha cardiac muscle 1, intermediate form]                                                                                                                                            |
| P62737 | ACTA_MOUSE  | Actin, aortic smooth muscle (Alpha-actin-2) [Cleaved into: Actin, aortic smooth muscle, intermediate form]                                                                                                                                                      |
| P60710 | ACTB_MOUSE  | Actin, cytoplasmic 1 (Beta-actin) [Cleaved into: Actin, cytoplasmic 1, N-terminally processed]                                                                                                                                                                  |
| P63260 | ACTG_MOUSE  | Actin, cytoplasmic 2 (Gamma-actin) [Cleaved into: Actin, cytoplasmic 2, N-terminally processed]                                                                                                                                                                 |
| P63268 | ACTH_MOUSE  | Actin, gamma-enteric smooth muscle (Alpha-actin-3) (Gamma-2-actin) (Smooth muscle gamma-actin) [Cleaved into: Actin, gamma-enteric smooth muscle, intermediate form]                                                                                            |
| P61161 | ARP2_MOUSE  | Actin-related protein 2 (Actin-like protein 2)                                                                                                                                                                                                                  |

|        |             |                                                                                                                                                                        |
|--------|-------------|------------------------------------------------------------------------------------------------------------------------------------------------------------------------|
| Q9R0Q6 | ARC1A_MOUSE | Actin-related protein 2/3 complex subunit 1A (SOP2-like protein) (Sid 329)                                                                                             |
| Q9WV32 | ARC1B_MOUSE | Actin-related protein 2/3 complex subunit 1B (Arp2/3 complex 41 kDa subunit) (p41-ARC)                                                                                 |
| Q9CVB6 | ARPC2_MOUSE | Actin-related protein 2/3 complex subunit 2 (Arp2/3 complex 34 kDa subunit) (p34-ARC)                                                                                  |
| Q9JM76 | ARPC3_MOUSE | Actin-related protein 2/3 complex subunit 3 (Arp2/3 complex 21 kDa subunit) (p21-ARC)                                                                                  |
| P59999 | ARPC4_MOUSE | Actin-related protein 2/3 complex subunit 4 (Arp2/3 complex 20 kDa subunit) (p20-ARC)                                                                                  |
| Q99JY9 | ARP3_MOUSE  | Actin-related protein 3 (Actin-like protein 3)                                                                                                                         |
| P97823 | LYPA1_MOUSE | Acyl-protein thioesterase 1 (APT-1) (EC 3.1.2.-) (Lysophospholipase 1) (Lysophospholipase I) (LPL-I) (LysoPLA I)                                                       |
| P08030 | APT_MOUSE   | Adenine phosphoribosyltransferase (APRT) (EC 2.4.2.7)                                                                                                                  |
| P55264 | ADK_MOUSE   | Adenosine kinase (AK) (EC 2.7.1.20) (Adenosine 5'-phosphotransferase)                                                                                                  |
| P50247 | SAHH_MOUSE  | Adenosylhomocysteinase (AdoHcyase) (EC 3.3.1.1) (CUBP) (Liver copper-binding protein) (S-adenosyl-L-homocysteine hydrolase)                                            |
| Q9R0Y5 | KAD1_MOUSE  | Adenylate kinase isoenzyme 1 (AK 1) (EC 2.7.4.3) (EC 2.7.4.6) (ATP-AMP transphosphorylase 1) (ATP:AMP phosphotransferase) (Adenylate monophosphate kinase) (Myokinase) |
| P54822 | PUR8_MOUSE  | Adenylosuccinate lyase (ASL) (EC 4.3.2.2) (Adenylosuccinase) (ASase)                                                                                                   |
| P40124 | CAP1_MOUSE  | Adenylyl cyclase-associated protein 1 (CAP 1)                                                                                                                          |
| Q9CYT6 | CAP2_MOUSE  | Adenylyl cyclase-associated protein 2 (CAP 2)                                                                                                                          |
| Q640N1 | AEBP1_MOUSE | Adipocyte enhancer-binding protein 1 (AE-binding protein 1) (Aortic carboxypeptidase-like protein)                                                                     |
| P84078 | ARF1_MOUSE  | ADP-ribosylation factor 1                                                                                                                                              |
| P61205 | ARF3_MOUSE  | ADP-ribosylation factor 3                                                                                                                                              |
| Q8CG76 | ARK72_MOUSE | Aflatoxin B1 aldehyde reductase member 2 (EC 1.1.1.n11) (Succinic semialdehyde reductase) (SSA reductase)                                                              |
| Q61282 | PGCA_MOUSE  | Aggrecan core protein (Cartilage-specific proteoglycan core protein) (CSPCP)                                                                                           |

|                  |                          |                                                                                                                                                                                                                                                                                                                          |
|------------------|--------------------------|--------------------------------------------------------------------------------------------------------------------------------------------------------------------------------------------------------------------------------------------------------------------------------------------------------------------------|
| A2ASQ1           | AGRIN_MOUSE              | Agrin [Cleaved into: Agrin N-terminal 110 kDa subunit; Agrin C-terminal 110 kDa subunit; Agrin C-terminal 90 kDa fragment (C90); Agrin C-terminal 22 kDa fragment (C22)]                                                                                                                                                 |
| Q8BGQ7<br>P07724 | SYAC_MOUSE<br>ALBU_MOUSE | Alanine--tRNA ligase, cytoplasmic (EC 6.1.1.7) (Alanyl-tRNA synthetase) (AlaRS) (Protein sticky) (Sti)<br>Albumin                                                                                                                                                                                                        |
| P00329           | ADH1_MOUSE               | Alcohol dehydrogenase 1 (EC 1.1.1.1) (ADH-A2) (Alcohol dehydrogenase A subunit)                                                                                                                                                                                                                                          |
| P28474           | ADHX_MOUSE               | Alcohol dehydrogenase class-3 (EC 1.1.1.1) (Alcohol dehydrogenase 2) (Alcohol dehydrogenase 5) (Alcohol dehydrogenase B2) (ADH-B2) (Alcohol dehydrogenase class-III) (Glutathione-dependent formaldehyde dehydrogenase) (FALDH) (FDH) (GSH-FDH) (EC 1.1.1.-) (S-(hydroxymethyl)glutathione dehydrogenase) (EC 1.1.1.284) |
| O35945           | AL1A7_MOUSE              | Aldehyde dehydrogenase, cytosolic 1 (EC 1.2.1.3) (ALDH class 1) (ALDH-E1) (ALHDII) (Aldehyde dehydrogenase family 1 member A7) (Aldehyde dehydrogenase phenobarbital-inducible)                                                                                                                                          |
| O54754           | AOXA_MOUSE               | Aldehyde oxidase 1 (EC 1.2.3.1) (Azaheterocycle hydroxylase 1) (EC 1.17.3.-) (Retinal oxidase)                                                                                                                                                                                                                           |
| Q9JII6           | AK1A1_MOUSE              | Aldo-keto reductase family 1 member A1 (EC 1.1.1.2) (EC 1.1.1.33) (EC 1.1.1.372) (EC 1.1.1.54) (Alcohol dehydrogenase [NADP(+)]) (Aldehyde reductase) (Glucuronate reductase) (EC 1.1.1.19) (Glucuronolactone reductase) (EC 1.1.1.20)                                                                                   |
| P45376           | ALDR_MOUSE               | Aldo-keto reductase family 1 member B1 (EC 1.1.1.300) (EC 1.1.1.372) (EC 1.1.1.54) (Aldehyde reductase) (Aldo-keto reductase family 1 member B3) (Aldose reductase) (AR) (EC 1.1.1.21)                                                                                                                                   |
| P21300           | ALD1_MOUSE               | Aldo-keto reductase family 1 member B7 (EC 1.1.1.21) (Aldehyde reductase) (AR) (Aldose reductase-related protein 1) (MVDP) (Vas deferens androgen-dependent protein)                                                                                                                                                     |
| Q8VCX1           | AK1D1_MOUSE              | Aldo-keto reductase family 1 member D1 (EC 1.3.1.3) (3-oxo-5-beta-steroid 4-dehydrogenase) (Delta(4)-3-ketosteroid 5-beta-reductase) (Delta(4)-3-oxosteroid 5-beta-reductase)                                                                                                                                            |

|        |             |                                                                                                                                                                                                                                                                                     |
|--------|-------------|-------------------------------------------------------------------------------------------------------------------------------------------------------------------------------------------------------------------------------------------------------------------------------------|
| P27808 | MGAT1_MOUSE | Alpha-1,3-mannosyl-glycoprotein 2-beta-N-acetylglucosaminyltransferase (EC 2.4.1.101) (N-glycosyl-oligosaccharide-glycoprotein N-acetylglucosaminyltransferase I) (GNT-I) (GlcNAc-T I)                                                                                              |
| Q921V5 | MGAT2_MOUSE | Alpha-1,6-mannosyl-glycoprotein 2-beta-N-acetylglucosaminyltransferase (EC 2.4.1.143) (Beta-1,2-N-acetylglucosaminyltransferase II) (GlcNAc-T II) (GNT-II) (Mannoside acetylglucosaminyltransferase 2) (N-glycosyl-oligosaccharide-glycoprotein N-acetylglucosaminyltransferase II) |
| O35696 | SIA8B_MOUSE | Alpha-2,8-sialyltransferase 8B (EC 2.4.99.-) (Polysialic acid synthase) (Sialyltransferase 8B) (SIAT8-B)                                                                                                                                                                            |
| P29699 | FETUA_MOUSE | (Sialyltransferase St8Sia II) (ST8SiaII) (Sialyltransferase X) (STX)                                                                                                                                                                                                                |
| Q6GQT1 | A2MG_MOUSE  | Alpha-2-HS-glycoprotein (Countertrypsin) (Fetuin-A)                                                                                                                                                                                                                                 |
| Q7TPR4 | ACTN1_MOUSE | Alpha-2-macroglobulin-P (Alpha-2-macroglobulin)                                                                                                                                                                                                                                     |
| P57780 | ACTN4_MOUSE | Alpha-actinin-1 (Alpha-actinin cytoskeletal isoform) (F-actin cross-linking protein) (Non-muscle alpha-actinin-1)                                                                                                                                                                   |
| Q9DBF1 | AL7A1_MOUSE | Alpha-actinin-4 (Non-muscle alpha-actinin 4)                                                                                                                                                                                                                                        |
| P00687 | AMY1_MOUSE  | Alpha-aminoadipic semialdehyde dehydrogenase (Alpha-AASA dehydrogenase) (EC 1.2.1.31)                                                                                                                                                                                               |
| P23927 | CRYAB_MOUSE | (Aldehyde dehydrogenase family 7 member A1) (EC 1.2.1.3) (Antiquitin-1) (Betaine aldehyde dehydrogenase) (EC 1.2.1.8) (Delta1-piperidine-6-carboxylate dehydrogenase) (P6c dehydrogenase)                                                                                           |
| P17182 | ENOA_MOUSE  | Alpha-amylase 1 (EC 3.2.1.1) (1,4-alpha-D-glucan glucanohydrolase 1) (Salivary and hepatic alpha-amylase)                                                                                                                                                                           |
| P27046 | MA2A1_MOUSE | Alpha-crystallin B chain (Alpha(B)-crystallin) (P23)                                                                                                                                                                                                                                |
| Q9QWR8 | NAGAB_MOUSE | Alpha-enolase (EC 4.2.1.11) (2-phospho-D-glycerate hydro-lyase) (Enolase 1) (Non-neural enolase)                                                                                                                                                                                    |
| Q9EPC1 | PARVA_MOUSE | (NNE)                                                                                                                                                                                                                                                                               |
|        |             | Alpha-mannosidase 2 (EC 3.2.1.114) (Golgi alpha-mannosidase II) (AMan II) (Man II) (Mannosidase alpha class 2A member 1) (Mannosyl-oligosaccharide 1,3-1,6-alpha-mannosidase)                                                                                                       |
|        |             | Alpha-N-acetylgalactosaminidase (EC 3.2.1.49) (Alpha-galactosidase B)                                                                                                                                                                                                               |
|        |             | Alpha-parvin (Actopaxin)                                                                                                                                                                                                                                                            |

|        |             |                                                                                                                                                                                                                                                                                                                                                                                                                                                                                                                                                                                                                                                                                                                                                                                                                                                          |
|--------|-------------|----------------------------------------------------------------------------------------------------------------------------------------------------------------------------------------------------------------------------------------------------------------------------------------------------------------------------------------------------------------------------------------------------------------------------------------------------------------------------------------------------------------------------------------------------------------------------------------------------------------------------------------------------------------------------------------------------------------------------------------------------------------------------------------------------------------------------------------------------------|
| Q9DB05 | SNAA_MOUSE  | Alpha-soluble NSF attachment protein (SNAP-alpha) (N-ethylmaleimide-sensitive factor attachment protein alpha)                                                                                                                                                                                                                                                                                                                                                                                                                                                                                                                                                                                                                                                                                                                                           |
| P12023 | A4_MOUSE    | Amyloid-beta A4 protein (ABPP) (APP) (Alzheimer disease amyloid A4 protein homolog) (Amyloid precursor protein) (Amyloid-beta precursor protein) (Amyloidogenic glycoprotein) (AG) [Cleaved into: N-APP; Soluble APP-alpha (S-APP-alpha); Soluble APP-beta (S-APP-beta); C99 (APP-C99) (Beta-secretase C-terminal fragment) (Beta-CTF); Amyloid-beta protein 42 (Abeta42) (Beta-APP42); Amyloid-beta protein 40 (Abeta40) (Beta-APP40); C83 (Alpha-secretase C-terminal fragment) (Alpha-CTF); P3(42); P3(40); C80; Gamma-secretase C-terminal fragment 59 (APP-C59) (Amyloid intracellular domain 59) (AID(59)) (Gamma-CTF(59)); Gamma-secretase C-terminal fragment 57 (APP-C57) (Amyloid intracellular domain 57) (AID(57)) (Gamma-CTF(57)); Gamma-secretase C-terminal fragment 50 (Amyloid intracellular domain 50) (AID(50)) (Gamma-CTF(50)); C31] |
| Q8VHG2 | AMOT_MOUSE  | Angiomotin                                                                                                                                                                                                                                                                                                                                                                                                                                                                                                                                                                                                                                                                                                                                                                                                                                               |
| Q9R045 | ANGL2_MOUSE | Angiotensin-converting enzyme 2 (Angiotensin-converting enzyme 2)                                                                                                                                                                                                                                                                                                                                                                                                                                                                                                                                                                                                                                                                                                                                                                                        |
| Q9R182 | ANGL3_MOUSE | Angiotensin-converting enzyme 3 (Angiotensin-converting enzyme 3) [Cleaved into: ANGPTL3(17-224)]                                                                                                                                                                                                                                                                                                                                                                                                                                                                                                                                                                                                                                                                                                                                                        |
| P09470 | ACE_MOUSE   | Angiotensin-converting enzyme (ACE) (EC 3.2.1.-) (EC 3.4.15.1) (Dipeptidyl carboxypeptidase I) (Kininase II) (CD antigen CD143) [Cleaved into: Angiotensin-converting enzyme, soluble form]                                                                                                                                                                                                                                                                                                                                                                                                                                                                                                                                                                                                                                                              |
| P10107 | ANXA1_MOUSE | Annexin A1 (Annexin I) (Annexin-1) (Calpactin II) (Calpactin-2) (Chromobindin-9) (Lipocortin I) (Phospholipase A2 inhibitory protein) (p35)                                                                                                                                                                                                                                                                                                                                                                                                                                                                                                                                                                                                                                                                                                              |
| P07356 | ANXA2_MOUSE | Annexin A2 (Annexin II) (Annexin-2) (Calpactin I heavy chain) (Calpactin-1 heavy chain) (Chromobindin-8) (Lipocortin II) (Placental anticoagulant protein IV) (PAP-IV) (Protein I) (p36)                                                                                                                                                                                                                                                                                                                                                                                                                                                                                                                                                                                                                                                                 |
| P48036 | ANXA5_MOUSE | Annexin A5 (Anchoring protein II) (Annexin V) (Annexin-5) (Calphobindin I) (CBP-I) (Endonexin II) (Lipocortin V) (Placental anticoagulant protein 4) (PP4) (Placental anticoagulant protein I) (PAP-I) (Thromboplastin inhibitor) (Vascular anticoagulant-alpha) (VAC-alpha)                                                                                                                                                                                                                                                                                                                                                                                                                                                                                                                                                                             |
| Q9CZ52 | ANTR1_MOUSE | Anthrax toxin receptor 1 (Tumor endothelial marker 8)                                                                                                                                                                                                                                                                                                                                                                                                                                                                                                                                                                                                                                                                                                                                                                                                    |

|        |             |                                                                                                                                                                               |
|--------|-------------|-------------------------------------------------------------------------------------------------------------------------------------------------------------------------------|
| P32261 | ANT3_MOUSE  | Antithrombin-III (ATIII) (Serpin C1)                                                                                                                                          |
| Q00623 | APOA1_MOUSE | Apolipoprotein A-I (Apo-AI) (ApoA-I) (Apolipoprotein A1) [Cleaved into: Proapolipoprotein A-I (ProapoA-I); Truncated apolipoprotein A-I]                                      |
| E9Q414 | APOB_MOUSE  | Apolipoprotein B-100 (Apo B-100) [Cleaved into: Apolipoprotein B-48 (Apo B-48)]                                                                                               |
| P08226 | APOE_MOUSE  | Apolipoprotein E (Apo-E)                                                                                                                                                      |
| Q9Z1R3 | APOM_MOUSE  | Apolipoprotein M (Apo-M) (ApoM)                                                                                                                                               |
| Q91YI0 | ARLY_MOUSE  | Argininosuccinate lyase (ASAL) (EC 4.3.2.1) (Arginosuccinase)                                                                                                                 |
| P16460 | ASSY_MOUSE  | Argininosuccinate synthase (EC 6.3.4.5) (Citrulline--aspartate ligase)                                                                                                        |
| P50294 | ARY1_MOUSE  | Arylamine N-acetyltransferase 1 (EC 2.3.1.5) (Arylamide acetylase 1) (N-acetyltransferase type 1) (NAT-1)                                                                     |
| P50295 | ARY2_MOUSE  | Arylamine N-acetyltransferase 2 (EC 2.3.1.5) (Arylamide acetylase 2) (N-acetyltransferase type 2) (NAT-2)                                                                     |
| P50296 | ARY3_MOUSE  | Arylamine N-acetyltransferase 3 (EC 2.3.1.5) (Arylamide acetylase 3) (N-acetyltransferase type 3) (NAT-3)                                                                     |
| Q8BP47 | SYNC_MOUSE  | Asparagine--tRNA ligase, cytoplasmic (EC 6.1.1.22) (AsparaginyI-tRNA synthetase) (AsnRS)                                                                                      |
| Q99MQ4 | ASPN_MOUSE  | (AsparaginyI-tRNA synthetase 1)                                                                                                                                               |
| Q92511 | ATAD3_MOUSE | Asporin (Periodontal ligament-associated protein 1) (PLAP-1)                                                                                                                  |
| Q91V92 | ACLY_MOUSE  | ATPase family AAA domain-containing protein 3 (AAA-ATPase TOB3)                                                                                                               |
| P12382 | PFKAL_MOUSE | ATP-citrate synthase (EC 2.3.3.8) (ATP-citrate (pro-S-)-lyase) (Citrate cleavage enzyme)                                                                                      |
| Q05793 | PGBM_MOUSE  | ATP-dependent 6-phosphofructokinase, liver type (ATP-PFK) (PFK-L) (EC 2.7.1.11) (6-phosphofructokinase type B) (Phosphofructo-1-kinase isozyme B) (PFK-B) (Phosphohexokinase) |
| Q9CQC6 | BZW1_MOUSE  | Basement membrane-specific heparan sulfate proteoglycan core protein (HSPG) [Cleaved into: Endorepellin; LG3 peptide]                                                         |
|        |             | Basic leucine zipper and W2 domain-containing protein 1                                                                                                                       |



|        |             |                                                                                                                                                                                                                                                                                                                                                                                                                                                                                                                                                                                                                                    |
|--------|-------------|------------------------------------------------------------------------------------------------------------------------------------------------------------------------------------------------------------------------------------------------------------------------------------------------------------------------------------------------------------------------------------------------------------------------------------------------------------------------------------------------------------------------------------------------------------------------------------------------------------------------------------|
| P15535 | B4GT1_MOUSE | Beta-1,4-galactosyltransferase 1 (Beta-1,4-GalTase 1) (Beta4Gal-T1) (b4Gal-T1) (EC 2.4.1.-) (Beta-N-acetylglucosaminyl-glycolipid beta-1,4-galactosyltransferase) (Beta-N-acetylglucosaminylglycopeptide beta-1,4-galactosyltransferase) (EC 2.4.1.38) (Lactose synthase A protein) (EC 2.4.1.22) (N-acetyllactosamine synthase) (EC 2.4.1.90) (Nal synthase) (Neolactotriaosylceramide beta-1,4-galactosyltransferase) (EC 2.4.1.275) (UDP-Gal:beta-GlcNAc beta-1,4-galactosyltransferase 1) (UDP-galactose:beta-N-acetylglucosamine beta-1,4-galactosyltransferase 1) [Cleaved into: Processed beta-1,4-galactosyltransferase 1] |
| Q8BWP8 | B4GA1_MOUSE | Beta-1,4-glucuronyltransferase 1 (EC 2.4.1.-) (I-beta-1,3-N-acetylglucosaminyltransferase) (iGnT) (N-acetyllactosaminide beta-1,3-N-acetylglucosaminyltransferase) (Poly-N-acetyllactosamine extension enzyme) (UDP-GlcNAc:betaGal beta-1,3-N-acetylglucosaminyltransferase 1)                                                                                                                                                                                                                                                                                                                                                     |
| Q01339 | APOH_MOUSE  | Beta-2-glycoprotein 1 (APC inhibitor) (Activated protein C-binding protein) (Apolipoprotein H) (Apo-H) (Beta-2-glycoprotein I) (B2GPI) (Beta(2)GPI)                                                                                                                                                                                                                                                                                                                                                                                                                                                                                |
| Q8BFZ3 | ACTBL_MOUSE | Beta-actin-like protein 2 (Kappa-actin)                                                                                                                                                                                                                                                                                                                                                                                                                                                                                                                                                                                            |
| P21550 | ENOB_MOUSE  | Beta-enolase (EC 4.2.1.11) (2-phospho-D-glycerate hydro-lyase) (Enolase 3) (Muscle-specific enolase) (MSE) (Skeletal muscle enolase)                                                                                                                                                                                                                                                                                                                                                                                                                                                                                               |
| P29416 | HEXA_MOUSE  | Beta-hexosaminidase subunit alpha (EC 3.2.1.52) (Beta-N-acetylhexosaminidase subunit alpha) (Hexosaminidase subunit A) (N-acetyl-beta-glucosaminidase subunit alpha)                                                                                                                                                                                                                                                                                                                                                                                                                                                               |
| P20060 | HEXB_MOUSE  | Beta-hexosaminidase subunit beta (EC 3.2.1.52) (Beta-N-acetylhexosaminidase subunit beta) (Hexosaminidase subunit B) (N-acetyl-beta-glucosaminidase subunit beta)                                                                                                                                                                                                                                                                                                                                                                                                                                                                  |
| O35490 | BHMT1_MOUSE | Betaine--homocysteine S-methyltransferase 1 (EC 2.1.1.5)                                                                                                                                                                                                                                                                                                                                                                                                                                                                                                                                                                           |
| Q9ES46 | PARVB_MOUSE | Beta-parvin                                                                                                                                                                                                                                                                                                                                                                                                                                                                                                                                                                                                                        |
| Q8VC97 | BUP1_MOUSE  | Beta-ureidopropionase (EC 3.5.1.6) (Beta-alanine synthase) (N-carbamoyl-beta-alanine amidohydrolase)                                                                                                                                                                                                                                                                                                                                                                                                                                                                                                                               |

|                  |                           |                                                                                                                                                                                                                                                                                                                                                                                            |
|------------------|---------------------------|--------------------------------------------------------------------------------------------------------------------------------------------------------------------------------------------------------------------------------------------------------------------------------------------------------------------------------------------------------------------------------------------|
| P34914           | HYES_MOUSE                | Bifunctional epoxide hydrolase 2 [Includes: Cytosolic epoxide hydrolase 2 (CEH) (EC 3.3.2.10) (Epoxide hydratase) (Soluble epoxide hydrolase) (SEH); Lipid-phosphate phosphatase (EC 3.1.3.76)]                                                                                                                                                                                            |
| Q3UHN9           | NDST1_MOUSE               | Bifunctional heparan sulfate N-deacetylase/N-sulfotransferase 1 (EC 2.8.2.8) (Glucosaminyl N-deacetylase/N-sulfotransferase 1) (NDST-1) (N-heparan sulfate sulfotransferase 1) (N-HSST 1) ([Heparan sulfate]-glucosamine N-sulfotransferase 1) (HSNST 1) [Includes: Heparan sulfate N-deacetylase 1 (EC 3.-.-.); Heparan sulfate N-sulfotransferase 1 (EC 2.8.2.-)]                        |
| Q9CWJ9           | PUR9_MOUSE                | Bifunctional purine biosynthesis protein ATIC (AICAR transformylase/inosine monophosphate cyclohydrolase) (ATIC) [Includes: Phosphoribosylaminoimidazolecarboxamide formyltransferase (EC 2.1.2.3) (5-aminoimidazole-4-carboxamide ribonucleotide formyltransferase) (AICAR formyltransferase) (AICAR transformylase); IMP cyclohydrolase (EC 3.5.4.10) (IMP synthase) (Inosinicase)]      |
| Q91WG8<br>P28653 | GLCNE_MOUSE<br>PGS1_MOUSE | Bifunctional UDP-N-acetylglucosamine 2-epimerase/N-acetylmannosamine kinase (UDP-GlcNAc-2-epimerase/ManAc kinase) [Includes: UDP-N-acetylglucosamine 2-epimerase (hydrolyzing) (EC 3.2.1.183) (UDP-GlcNAc-2-epimerase) (Uridine diphosphate-N-acetylglucosamine-2-epimerase); N-acetylmannosamine kinase (EC 2.7.1.60) (ManAc kinase)]<br>Biglycan (Bone/cartilage proteoglycan I) (PG-S1) |
| Q9CY64           | BIEA_MOUSE                | Biliverdin reductase A (BVR A) (EC 1.3.1.24) (Biliverdin-IX alpha-reductase)                                                                                                                                                                                                                                                                                                               |
| P15327           | PMGE_MOUSE                | Bisphosphoglycerate mutase (BPGM) (EC 5.4.2.4) (2,3-bisphosphoglycerate mutase, erythrocyte) (2,3-bisphosphoglycerate synthase) (EC 5.4.2.11) (BPG-dependent PGAM)                                                                                                                                                                                                                         |
| P98063           | BMP1_MOUSE                | Bone morphogenetic protein 1 (BMP-1) (EC 3.4.24.19) (Mammalian tolloid protein) (mTld) (Procollagen C-proteinase) (PCP)                                                                                                                                                                                                                                                                    |
| A2A5R2           | BIG2_MOUSE                | Brefeldin A-inhibited guanine nucleotide-exchange protein 2 (Brefeldin A-inhibited GEP 2) (ADP-ribosylation factor guanine nucleotide-exchange factor 2)                                                                                                                                                                                                                                   |

|                            |                                         |                                                                                                                                                                                                                                                                                                                                                                                   |
|----------------------------|-----------------------------------------|-----------------------------------------------------------------------------------------------------------------------------------------------------------------------------------------------------------------------------------------------------------------------------------------------------------------------------------------------------------------------------------|
| G5E8P1<br>Q3UQU0           | BRD1_MOUSE<br>BRD9_MOUSE                | Bromodomain-containing protein 1 (Bromodomain and PHD finger-containing protein 2)<br>Bromodomain-containing protein 9                                                                                                                                                                                                                                                            |
| Q922D8<br>P55288           | C1TC_MOUSE<br>CAD11_MOUSE               | C-1-tetrahydrofolate synthase, cytoplasmic (C1-THF synthase) [Cleaved into: C-1-tetrahydrofolate synthase, cytoplasmic, N-terminally processed] [Includes: Methylenetetrahydrofolate dehydrogenase (EC 1.5.1.5); Methenyltetrahydrofolate cyclohydrolase (EC 3.5.4.9); Formyltetrahydrofolate synthetase (EC 6.3.4.3)]<br>Cadherin-11 (OSF-4) (Osteoblast cadherin) (OB-cadherin) |
| P14211<br>Q9EPL2           | CALR_MOUSE<br>CSTN1_MOUSE               | Calreticulin (CRP55) (Calregulin) (Endoplasmic reticulum resident protein 60) (ERp60) (HACBP) Calsyntenin-1 (Alcadein-alpha) (Alc-alpha) [Cleaved into: Soluble Alc-alpha (SAlc-alpha); CTF1-alpha (C-terminal fragment 1-alpha)]                                                                                                                                                 |
| P05132                     | KAPCA_MOUSE                             | cAMP-dependent protein kinase catalytic subunit alpha (PKA C-alpha) (EC 2.7.11.11)                                                                                                                                                                                                                                                                                                |
| Q9DBC7<br>P12367           | KAP0_MOUSE<br>KAP2_MOUSE                | cAMP-dependent protein kinase type I-alpha regulatory subunit [Cleaved into: cAMP-dependent protein kinase type I-alpha regulatory subunit, N-terminally processed]<br>cAMP-dependent protein kinase type II-alpha regulatory subunit                                                                                                                                             |
| P16015                     | CAH3_MOUSE                              | Carbonic anhydrase 3 (EC 4.2.1.1) (Carbonate dehydratase III) (Carbonic anhydrase III) (CA-III)                                                                                                                                                                                                                                                                                   |
| P48758                     | CBR1_MOUSE                              | Carbonyl reductase [NADPH] 1 (EC 1.1.1.184) (15-hydroxyprostaglandin dehydrogenase [NADP(+)]) (EC 1.1.1.196) (EC 1.1.1.197) (20-beta-hydroxysteroid dehydrogenase) (NADPH-dependent carbonyl reductase 1) (Prostaglandin 9-ketoreductase) (PG-9-KR) (Prostaglandin-E(2) 9-reductase) (EC 1.1.1.189)                                                                               |
| Q8K354<br>Q8R1G2<br>Q7TPZ8 | CBR3_MOUSE<br>CMBL_MOUSE<br>CBPA1_MOUSE | Carbonyl reductase [NADPH] 3 (EC 1.1.1.184) (NADPH-dependent carbonyl reductase 3)<br>Carboxymethylenebutenolidase homolog (EC 3.1.-.-)<br>Carboxypeptidase A1 (EC 3.4.17.1)                                                                                                                                                                                                      |
| Q9JHH6                     | CBPB2_MOUSE                             | Carboxypeptidase B2 (EC 3.4.17.20) (Carboxypeptidase R) (CPR) (Carboxypeptidase U) (CPU) (Thrombin-activable fibrinolysis inhibitor) (TAFI)                                                                                                                                                                                                                                       |

|        |             |                                                                                                                                                                                                                                                                                              |
|--------|-------------|----------------------------------------------------------------------------------------------------------------------------------------------------------------------------------------------------------------------------------------------------------------------------------------------|
| Q9JJN5 | CBPN_MOUSE  | Carboxypeptidase N catalytic chain (CPN) (EC 3.4.17.3) (Carboxypeptidase N polypeptide 1)                                                                                                                                                                                                    |
| Q9R0G6 | COMP_MOUSE  | (Carboxypeptidase N small subunit)                                                                                                                                                                                                                                                           |
| Q9CYD3 | CRTAP_MOUSE | Cartilage oligomeric matrix protein (COMP)                                                                                                                                                                                                                                                   |
| P24270 | CATA_MOUSE  | Cartilage-associated protein                                                                                                                                                                                                                                                                 |
| O88587 | COMT_MOUSE  | Catalase (EC 1.11.1.6)                                                                                                                                                                                                                                                                       |
| P10605 | CATB_MOUSE  | Catechol O-methyltransferase (EC 2.1.1.6)                                                                                                                                                                                                                                                    |
| P18242 | CATD_MOUSE  | Cathepsin B (EC 3.4.22.1) (Cathepsin B1) [Cleaved into: Cathepsin B light chain; Cathepsin B heavy chain]                                                                                                                                                                                    |
| Q9WUU7 | CATZ_MOUSE  | Cathepsin D (EC 3.4.23.5)                                                                                                                                                                                                                                                                    |
|        |             | Cathepsin Z (EC 3.4.18.1)                                                                                                                                                                                                                                                                    |
| Q07113 | MPRI_MOUSE  | Cation-independent mannose-6-phosphate receptor (CI Man-6-P receptor) (CI-MPR) (M6PR) (300 kDa mannose 6-phosphate receptor) (MPR 300) (Insulin-like growth factor 2 receptor) (Insulin-like growth factor II receptor) (IGF-II receptor) (M6P/IGF2 receptor) (M6P/IGF2R) (CD antigen CD222) |
| P29268 | CCN2_MOUSE  | CCN family member 2 (Cellular communication network factor 2) (Connective tissue growth factor) (Hypertrophic chondrocyte-specific protein 24) (Protein FISP-12)                                                                                                                             |
| Q9Z0G4 | CCN5_MOUSE  | CCN family member 5 (Connective tissue growth factor-like protein) (CTGF-L) (WNT1-inducible-signaling pathway protein 2) (WISP-2)                                                                                                                                                            |
| P41731 | CD63_MOUSE  | CD63 antigen (CD antigen CD63)                                                                                                                                                                                                                                                               |
| P35762 | CD81_MOUSE  | CD81 antigen (26 kDa cell surface protein TAPA-1) (Target of the antiproliferative antibody 1) (CD antigen CD81)                                                                                                                                                                             |
| P40240 | CD9_MOUSE   | CD9 antigen (CD antigen CD9)                                                                                                                                                                                                                                                                 |
| P60766 | CDC42_MOUSE | Cell division control protein 42 homolog (EC 3.6.5.2) (G25K GTP-binding protein)                                                                                                                                                                                                             |
| Q8BI06 | CEMIP_MOUSE | Cell migration-inducing and hyaluronan-binding protein (EC 3.2.1.35) (Protein 12H19.01.T7)                                                                                                                                                                                                   |
| P22935 | RABP2_MOUSE | Cellular retinoic acid-binding protein 2 (Cellular retinoic acid-binding protein II) (CRABP-II)                                                                                                                                                                                              |
| Q8CG03 | PDE5A_MOUSE | cGMP-specific 3',5'-cyclic phosphodiesterase (EC 3.1.4.35) (cGMP-binding cGMP-specific phosphodiesterase) (CGB-PDE)                                                                                                                                                                          |

|        |             |                                                                                                                                                                            |
|--------|-------------|----------------------------------------------------------------------------------------------------------------------------------------------------------------------------|
| Q9Z1Q5 | CLIC1_MOUSE | Chloride intracellular channel protein 1 (Nuclear chloride ion channel 27) (NCC27)                                                                                         |
| Q9QYB1 | CLIC4_MOUSE | Chloride intracellular channel protein 4 (mc3s5/mtCLIC)                                                                                                                    |
| Q8BY89 | CTL2_MOUSE  | Choline transporter-like protein 2 (Solute carrier family 44 member 2)                                                                                                     |
| Q8VHY0 | CSPG4_MOUSE | Chondroitin sulfate proteoglycan 4 (Chondroitin sulfate proteoglycan NG2) (Proteoglycan AN2)                                                                               |
| Q68FD5 | CLH1_MOUSE  | Clathrin heavy chain 1                                                                                                                                                     |
| P16294 | FA9_MOUSE   | Coagulation factor IX (EC 3.4.21.22) (Christmas factor) [Cleaved into: Coagulation factor IXa light chain; Coagulation factor IXa heavy chain]                             |
| O88783 | FA5_MOUSE   | Coagulation factor V (Activated protein C cofactor) [Cleaved into: Coagulation factor V heavy chain; Coagulation factor V light chain]                                     |
| O88947 | FA10_MOUSE  | Coagulation factor X (EC 3.4.21.6) (Stuart factor) [Cleaved into: Factor X light chain; Factor X heavy chain; Activated factor Xa heavy chain]                             |
| Q91Y47 | FA11_MOUSE  | Coagulation factor XI (FXI) (EC 3.4.21.27) (Plasma thromboplastin antecedent) (PTA) [Cleaved into: Coagulation factor XIa heavy chain; Coagulation factor XIa light chain] |
| Q8BH61 | F13A_MOUSE  | Coagulation factor XIII A chain (Coagulation factor XIIIa) (EC 2.3.2.13) (Protein-glutamine gamma-glutamyltransferase A chain) (Transglutaminase A chain)                  |
| Q07968 | F13B_MOUSE  | Coagulation factor XIII B chain (Protein-glutamine gamma-glutamyltransferase B chain) (Transglutaminase B chain)                                                           |
| P18760 | COF1_MOUSE  | Cofilin-1 (Cofilin, non-muscle isoform)                                                                                                                                    |
| P45591 | COF2_MOUSE  | Cofilin-2 (Cofilin, muscle isoform)                                                                                                                                        |
| P11087 | CO1A1_MOUSE | Collagen alpha-1(I) chain (Alpha-1 type I collagen)                                                                                                                        |
| P28481 | CO2A1_MOUSE | Collagen alpha-1(II) chain (Alpha-1 type II collagen) [Cleaved into: Collagen alpha-1(II) chain; Chondrocalcin]                                                            |
| P08121 | CO3A1_MOUSE | Collagen alpha-1(III) chain                                                                                                                                                |
| P02463 | CO4A1_MOUSE | Collagen alpha-1(IV) chain [Cleaved into: Arresten]                                                                                                                        |
| Q05722 | CO9A1_MOUSE | Collagen alpha-1(IX) chain                                                                                                                                                 |
| O88207 | CO5A1_MOUSE | Collagen alpha-1(V) chain                                                                                                                                                  |
| Q04857 | CO6A1_MOUSE | Collagen alpha-1(VI) chain                                                                                                                                                 |
| Q63870 | CO7A1_MOUSE | Collagen alpha-1(VII) chain (Long-chain collagen) (LC collagen)                                                                                                            |
| Q60847 | COCA1_MOUSE | Collagen alpha-1(XII) chain                                                                                                                                                |

|        |             |                                                                                                                                                                                                                                                                                                                                                                                                     |
|--------|-------------|-----------------------------------------------------------------------------------------------------------------------------------------------------------------------------------------------------------------------------------------------------------------------------------------------------------------------------------------------------------------------------------------------------|
| Q80X19 | COEA1_MOUSE | Collagen alpha-1(XIV) chain                                                                                                                                                                                                                                                                                                                                                                         |
| O35206 | COFA1_MOUSE | Collagen alpha-1(XV) chain [Cleaved into: Restin (Endostatin-XV)]                                                                                                                                                                                                                                                                                                                                   |
| P39061 | COIA1_MOUSE | Collagen alpha-1(XVIII) chain [Cleaved into: Endostatin; Non-collagenous domain 1 (NC1)]                                                                                                                                                                                                                                                                                                            |
| Q01149 | CO1A2_MOUSE | Collagen alpha-2(I) chain (Alpha-2 type I collagen)                                                                                                                                                                                                                                                                                                                                                 |
| P08122 | CO4A2_MOUSE | Collagen alpha-2(IV) chain [Cleaved into: Canstatin]                                                                                                                                                                                                                                                                                                                                                |
| Q3U962 | CO5A2_MOUSE | Collagen alpha-2(V) chain                                                                                                                                                                                                                                                                                                                                                                           |
| Q02788 | CO6A2_MOUSE | Collagen alpha-2(VI) chain                                                                                                                                                                                                                                                                                                                                                                          |
| Q9QZS0 | CO4A3_MOUSE | Collagen alpha-3(IV) chain [Cleaved into: Tumstatin]                                                                                                                                                                                                                                                                                                                                                |
| Q8CF98 | COL10_MOUSE | Collectin-10 (Collectin liver protein 1) (CL-L1)                                                                                                                                                                                                                                                                                                                                                    |
| Q02105 | C1QC_MOUSE  | Complement C1q subcomponent subunit C                                                                                                                                                                                                                                                                                                                                                               |
| Q9ES30 | C1QT3_MOUSE | Complement C1q tumor necrosis factor-related protein 3 (Collagenous repeat-containing sequence 26 kDa protein) (CORS26) (Secretory protein CORS26)                                                                                                                                                                                                                                                  |
| Q8K479 | C1QT5_MOUSE | Complement C1q tumor necrosis factor-related protein 5                                                                                                                                                                                                                                                                                                                                              |
| Q8CG16 | C1RA_MOUSE  | Complement C1r-A subcomponent (EC 3.4.21.41) (Complement component 1 subcomponent r-A) [Cleaved into: Complement C1r-A subcomponent heavy chain; Complement C1r-A subcomponent light chain]                                                                                                                                                                                                         |
| P01027 | CO3_MOUSE   | Complement C3 (HSE-MSF) [Cleaved into: Complement C3 beta chain; C3-beta-c (C3bc); Complement C3 alpha chain; C3a anaphylatoxin; Acylation stimulating protein (ASP) (C3adesArg); Complement C3b alpha' chain; Complement C3c alpha' chain fragment 1; Complement C3dg fragment; Complement C3g fragment; Complement C3d fragment; Complement C3f fragment; Complement C3c alpha' chain fragment 2] |
| P01029 | CO4B_MOUSE  | Complement C4-B [Cleaved into: Complement C4 beta chain; Complement C4 alpha chain; C4a anaphylatoxin; Complement C4 gamma chain]                                                                                                                                                                                                                                                                   |
| P06684 | CO5_MOUSE   | Complement C5 (Hemolytic complement) [Cleaved into: Complement C5 beta chain; Complement C5 alpha chain; C5a anaphylatoxin; Complement C5 alpha' chain]                                                                                                                                                                                                                                             |
| Q8K182 | CO8A_MOUSE  | Complement component C8 alpha chain (Complement component 8 subunit alpha)                                                                                                                                                                                                                                                                                                                          |

|        |             |                                                                                                                                                                                                |
|--------|-------------|------------------------------------------------------------------------------------------------------------------------------------------------------------------------------------------------|
| Q8BH35 | CO8B_MOUSE  | Complement component C8 beta chain (Complement component 8 subunit beta)                                                                                                                       |
| P04186 | CFAB_MOUSE  | Complement factor B (EC 3.4.21.47) (C3/C5 convertase) [Cleaved into: Complement factor B Ba fragment; Complement factor B Bb fragment]                                                         |
| Q8K2Z4 | CND1_MOUSE  | Condensin complex subunit 1 (Chromosome condensation-related SMC-associated protein 1) (Chromosome-associated protein D2) (mCAP-D2) (Non-SMC condensin I complex subunit D2) (XCAP-D2 homolog) |
| P12960 | CNTN1_MOUSE | Contactin-1 (Neural cell surface protein F3)                                                                                                                                                   |
| O88544 | CSN4_MOUSE  | COP9 signalosome complex subunit 4 (SGN4) (Signalosome subunit 4) (JAB1-containing signalosome subunit 4)                                                                                      |
| O89053 | COR1A_MOUSE | Coronin-1A (Coronin-like protein A) (Clipin-A) (Coronin-like protein p57) (Tryptophan aspartate-containing coat protein) (TACO)                                                                |
| Q9WUM3 | COR1B_MOUSE | Coronin-1B (Coronin-2)                                                                                                                                                                         |
| Q9WUM4 | COR1C_MOUSE | Coronin-1C (Coronin-3)                                                                                                                                                                         |
| Q04447 | KCRB_MOUSE  | Creatine kinase B-type (EC 2.7.3.2) (B-CK) (Creatine kinase B chain) (Creatine phosphokinase B-type) (CPK-B)                                                                                   |
| P07310 | KCRM_MOUSE  | Creatine kinase M-type (EC 2.7.3.2) (Creatine kinase M chain) (Creatine phosphokinase M-type) (CPK-M) (M-CK)                                                                                   |
| O88200 | CLC11_MOUSE | C-type lectin domain family 11 member A (Lymphocyte secreted C-type lectin) (Osteolectin) (Stem cell growth factor)                                                                            |
| Q64449 | MRC2_MOUSE  | C-type mannose receptor 2 (Lectin lambda) (Macrophage mannose receptor 2) (CD antigen CD280)                                                                                                   |
| Q6ZQ38 | CAND1_MOUSE | Cullin-associated NEDD8-dissociated protein 1 (Cullin-associated and neddylation-dissociated protein 1) (p120 CAND1)                                                                           |
| P97315 | CSRP1_MOUSE | Cysteine and glycine-rich protein 1 (Cysteine-rich protein 1) (CRP) (CRP1)                                                                                                                     |
| Q9DBE0 | CSAD_MOUSE  | Cysteine sulfinic acid decarboxylase (EC 4.1.1.29) (Aspartate 1-decarboxylase) (EC 4.1.1.11) (Cysteine-sulfinic acid decarboxylase) (Sulfinic acid decarboxylase)                              |
| Q9JM58 | CRLF1_MOUSE | Cytokine receptor-like factor 1 (Cytokine receptor-like molecule 3) (CRLM-3) (Cytokine-like factor 1) (CLF-1) (Novel cytokine receptor 6) (NR6)                                                |

|        |             |                                                                                                                                                                          |
|--------|-------------|--------------------------------------------------------------------------------------------------------------------------------------------------------------------------|
| P28271 | ACOC_MOUSE  | Cytoplasmic aconitate hydratase (Aconitase) (EC 4.2.1.3) (Citrate hydro-lyase) (Iron regulatory protein 1) (IRP1) (Iron-responsive element-binding protein 1) (IRE-BP 1) |
| Q9JHU4 | DYHC1_MOUSE | Cytoplasmic dynein 1 heavy chain 1 (Cytoplasmic dynein heavy chain 1) (Dynein heavy chain, cytosolic)                                                                    |
| Q8R0Y6 | AL1L1_MOUSE | Cytosolic 10-formyltetrahydrofolate dehydrogenase (10-FTHFDH) (FDH) (EC 1.5.1.6) (Aldehyde dehydrogenase family 1 member L1)                                             |
| Q9D1A2 | CNDP2_MOUSE | Cytosolic non-specific dipeptidase (EC 3.4.13.18) (CNDP dipeptidase 2) (Glutamate carboxypeptidase-like protein 1)                                                       |
| Q61753 | SERA_MOUSE  | D-3-phosphoglycerate dehydrogenase (3-PGDH) (EC 1.1.1.95) (A10)                                                                                                          |
| P28654 | PGS2_MOUSE  | Decorin (Bone proteoglycan II) (PG-S2) (PG40)                                                                                                                            |
| Q8R1A4 | DOCK7_MOUSE | Dedicator of cytokinesis protein 7 (Protein moonlight)                                                                                                                   |
| E9Q557 | DESP_MOUSE  | Desmoplakin (DP)                                                                                                                                                         |
| Q9R0P5 | DEST_MOUSE  | Destrin (Actin-depolymerizing factor) (ADF) (Sid 23)                                                                                                                     |
| P00375 | DYR_MOUSE   | Dihydrofolate reductase (EC 1.5.1.3)                                                                                                                                     |
| Q8BVI4 | DHPR_MOUSE  | Dihydropteridine reductase (EC 1.5.1.34) (HDHPR) (Quinoid dihydropteridine reductase)                                                                                    |
| Q9EQF5 | DPYS_MOUSE  | Dihydropyrimidinase (DHP) (DHPase) (EC 3.5.2.2) (Dihydropyrimidine amidohydrolase) (Hydantoinase)                                                                        |
| P97427 | DPYL1_MOUSE | Dihydropyrimidinase-related protein 1 (DRP-1) (Collapsin response mediator protein 1) (CRMP-1) (Inactive dihydropyrimidinase) (Unc-33-like phosphoprotein 3) (ULIP-3)    |
| O08553 | DPYL2_MOUSE | Dihydropyrimidinase-related protein 2 (DRP-2) (Unc-33-like phosphoprotein 2) (ULIP-2)                                                                                    |
| Q8CHR6 | DPYD_MOUSE  | Dihydropyrimidine dehydrogenase [NADP(+)] (DHPDHase) (DPD) (EC 1.3.1.2) (Dihydrothymine dehydrogenase) (Dihydrouracil dehydrogenase)                                     |
| P31428 | DPEP1_MOUSE | Dipeptidase 1 (DPEP-1) (EC 3.4.13.19) (Beta-lactamase) (EC 3.5.2.6) (Membrane-bound dipeptidase 1) (MBD-1) (Microsomal dipeptidase) (Renal dipeptidase)                  |
| Q99KK7 | DPP3_MOUSE  | Dipeptidyl peptidase 3 (EC 3.4.14.4) (Dipeptidyl aminopeptidase III) (Dipeptidyl arylamidase III) (Dipeptidyl peptidase III) (DPP III) (Enkephalinase B)                 |



|        |             |                                                                                                                                                                                 |
|--------|-------------|---------------------------------------------------------------------------------------------------------------------------------------------------------------------------------|
| O35598 | ADA10_MOUSE | Disintegrin and metalloproteinase domain-containing protein 10 (ADAM 10) (EC 3.4.24.81) (Kuzbanian protein homolog) (Mammalian disintegrin-metalloprotease) (CD antigen CD156c) |
| Q8C3I9 | DIK2B_MOUSE | Divergent protein kinase domain 2B (Deleted in autism-related protein 1 homolog)                                                                                                |
| P31938 | MP2K1_MOUSE | Dual specificity mitogen-activated protein kinase kinase 1 (MAP kinase kinase 1) (MAPKK 1) (EC 2.7.12.2) (ERK activator kinase 1) (MAPK/ERK kinase 1) (MEK 1)                   |
| P35761 | TTK_MOUSE   | Dual specificity protein kinase TTK (EC 2.7.12.1) (ESK) (PYT)                                                                                                                   |
| Q8K1M6 | DNM1L_MOUSE | Dynamin-1-like protein (EC 3.6.5.5) (Dynamin family member proline-rich carboxyl-terminal domain less) (Dymple) (Dynamin-related protein 1)                                     |
| P63168 | DYL1_MOUSE  | Dynein light chain 1, cytoplasmic (8 kDa dynein light chain) (DLC8) (Dynein light chain LC8-type 1) (Protein inhibitor of neuronal nitric oxide synthase) (PIN) (mPIN)          |
| Q9D0M5 | DYL2_MOUSE  | Dynein light chain 2, cytoplasmic (8 kDa dynein light chain b) (DLC8) (DLC8b) (Dynein light chain LC8-type 2)                                                                   |
| Q7TNG5 | EMAL2_MOUSE | Echinoderm microtubule-associated protein-like 2 (EMAP-2)                                                                                                                       |
| Q9WVJ9 | FBLN4_MOUSE | EGF-containing fibulin-like extracellular matrix protein 2 (Fibulin-4) (FIBL-4) (Mutant p53-binding protein 1)                                                                  |
| O35474 | EDIL3_MOUSE | EGF-like repeat and discoidin I-like domain-containing protein 3 (Developmentally-regulated endothelial cell locus 1 protein) (Integrin-binding protein DEL1)                   |
| Q9WVK4 | EHD1_MOUSE  | EH domain-containing protein 1 (PAST homolog 1) (mPAST1)                                                                                                                        |
| Q8BH64 | EHD2_MOUSE  | EH domain-containing protein 2                                                                                                                                                  |
| Q9QXY6 | EHD3_MOUSE  | EH domain-containing protein 3                                                                                                                                                  |
| P10126 | EF1A1_MOUSE | Elongation factor 1-alpha 1 (EF-1-alpha-1) (Elongation factor Tu) (EF-Tu) (Eukaryotic elongation factor 1 A-1) (eEF1A-1)                                                        |
| Q9D8N0 | EF1G_MOUSE  | Elongation factor 1-gamma (EF-1-gamma) (eEF-1B gamma)                                                                                                                           |
| P58252 | EF2_MOUSE   | Elongation factor 2 (EF-2)                                                                                                                                                      |
| P62869 | ELOB_MOUSE  | Elongin-B (EloB) (Elongin 18 kDa subunit) (RNA polymerase II transcription factor SIII subunit B) (SIII p18) (Transcription elongation factor B polypeptide 2)                  |

|        |             |                                                                                                                                                                                                                                                                                                                                                                                  |
|--------|-------------|----------------------------------------------------------------------------------------------------------------------------------------------------------------------------------------------------------------------------------------------------------------------------------------------------------------------------------------------------------------------------------|
| Q99K41 | EMIL1_MOUSE | EMILIN-1 (Elastin microfibril interface-located protein 1) (Elastin microfibril interfacier 1)                                                                                                                                                                                                                                                                                   |
| Q8K482 | EMIL2_MOUSE | EMILIN-2 (Basilin) (Elastin microfibril interface-located protein 2) (Elastin microfibril interfacier 2)                                                                                                                                                                                                                                                                         |
| P59900 | EMIL3_MOUSE | EMILIN-3 (EMILIN-5) (Elastin microfibril interface located protein 5) (Elastin microfibril interfacier 5)<br>(Elastin microfibril interface-located protein 3) (Elastin microfibril interfacier 3)                                                                                                                                                                               |
| P20029 | BIP_MOUSE   | Endoplasmic reticulum chaperone BiP (EC 3.6.4.10) (78 kDa glucose-regulated protein) (GRP-78)<br>(Binding-immunoglobulin protein) (BiP) (Heat shock protein 70 family protein 5) (HSP70 family<br>protein 5) (Heat shock protein family A member 5) (Immunoglobulin heavy chain-binding protein)                                                                                 |
| P08113 | ENPL_MOUSE  | Endoplasmin (94 kDa glucose-regulated protein) (GRP-94) (Endoplasmic reticulum resident protein<br>99) (ERp99) (Heat shock protein 90 kDa beta member 1) (Polymorphic tumor rejection antigen 1)<br>(Tumor rejection antigen gp96)                                                                                                                                               |
| O70258 | SGCE_MOUSE  | Epsilon-sarcoglycan (Epsilon-SG)                                                                                                                                                                                                                                                                                                                                                 |
| P70694 | DHB5_MOUSE  | Estradiol 17 beta-dehydrogenase 5 (EC 1.1.1.-) (17-beta-HSD 5)                                                                                                                                                                                                                                                                                                                   |
| P60843 | IF4A1_MOUSE | Eukaryotic initiation factor 4A-I (eIF-4A-I) (eIF4A-I) (EC 3.6.4.13) (ATP-dependent RNA helicase<br>eIF4A-1)                                                                                                                                                                                                                                                                     |
| P10630 | IF4A2_MOUSE | Eukaryotic initiation factor 4A-II (eIF-4A-II) (eIF4A-II) (EC 3.6.4.13) (ATP-dependent RNA helicase<br>eIF4A-2)                                                                                                                                                                                                                                                                  |
| Q6ZWX6 | IF2A_MOUSE  | Eukaryotic translation initiation factor 2 subunit 1 (Eukaryotic translation initiation factor 2 subunit<br>alpha) (eIF-2-alpha) (eIF-2A) (eIF-2alpha)                                                                                                                                                                                                                           |
| Q9Z0N1 | IF2G_MOUSE  | Eukaryotic translation initiation factor 2 subunit 3, X-linked (EC 3.6.5.3) (Eukaryotic translation<br>initiation factor 2 subunit gamma, X-linked) (eIF-2-gamma X)<br>Eukaryotic translation initiation factor 2 subunit 3, Y-linked (EC 3.6.5.3) (Eukaryotic translation<br>initiation factor 2 subunit gamma, Y-linked) (eIF-2-gamma Y) (Spermatogonial proliferation factor) |
| Q9Z0N2 | IF2H_MOUSE  | (Spy)                                                                                                                                                                                                                                                                                                                                                                            |
| P63073 | IF4E_MOUSE  | Eukaryotic translation initiation factor 4E (eIF-4E) (eIF4E) (mRNA cap-binding protein) (eIF-4F 25<br>kDa subunit)                                                                                                                                                                                                                                                               |

|        |             |                                                                                                                                                                                                                                                                  |
|--------|-------------|------------------------------------------------------------------------------------------------------------------------------------------------------------------------------------------------------------------------------------------------------------------|
| P63242 | IF5A1_MOUSE | Eukaryotic translation initiation factor 5A-1 (eIF-5A-1) (eIF-5A1) (Eukaryotic initiation factor 5A isoform 1) (eIF-5A) (eIF-4D)                                                                                                                                 |
| O55135 | IF6_MOUSE   | Eukaryotic translation initiation factor 6 (eIF-6) (B4 integrin interactor) (CAB) (p27(BBP))                                                                                                                                                                     |
| P97464 | EXT1_MOUSE  | Exostosin-1 (EC 2.4.1.224) (EC 2.4.1.225) (Glucuronosyl-N-acetylglucosaminyl-proteoglycan/N-acetylglucosaminyl-proteoglycan 4-alpha-N-acetylglucosaminyltransferase) (Multiple exostoses protein 1 homolog)                                                      |
| P70428 | EXT2_MOUSE  | Exostosin-2 (EC 2.4.1.224) (EC 2.4.1.225) (Glucuronosyl-N-acetylglucosaminyl-proteoglycan/N-acetylglucosaminyl-proteoglycan 4-alpha-N-acetylglucosaminyltransferase) (Multiple exostoses protein 2 homolog)                                                      |
| Q6P5F9 | XPO1_MOUSE  | Exportin-1 (Exp1) (Chromosome region maintenance 1 protein homolog)                                                                                                                                                                                              |
| Q9ERK4 | XPO2_MOUSE  | Exportin-2 (Exp2) (Chromosome segregation 1-like protein) (Importin-alpha re-exporter)                                                                                                                                                                           |
| Q5MJS3 | FA20C_MOUSE | Extracellular serine/threonine protein kinase FAM20C (EC 2.7.11.1) (Dentin matrix protein 4) (DMP-4) (Golgi-enriched fraction casein kinase) (GEF-CK)                                                                                                            |
| P26040 | EZRI_MOUSE  | Ezrin (Cytovillin) (Villin-2) (p81)                                                                                                                                                                                                                              |
| P47753 | CAZA1_MOUSE | F-actin-capping protein subunit alpha-1 (CapZ alpha-1)                                                                                                                                                                                                           |
| P47754 | CAZA2_MOUSE | F-actin-capping protein subunit alpha-2 (CapZ alpha-2)                                                                                                                                                                                                           |
| P47757 | CAPZB_MOUSE | F-actin-capping protein subunit beta (CapZ beta)                                                                                                                                                                                                                 |
| Q920E5 | FPPS_MOUSE  | Farnesyl pyrophosphate synthase (FPP synthase) (FPS) (EC 2.5.1.10) ((2E,6E)-farnesyl diphosphate synthase) (Cholesterol-regulated 39 kDa protein) (CR 39) (Dimethylallyltranstransferase) (EC 2.5.1.1) (Farnesyl diphosphate synthase) (Geranyltranstransferase) |
| Q61553 | FSCN1_MOUSE | Fascin (Singed-like protein)                                                                                                                                                                                                                                     |

|        |             |                                                                                                                                                                                                                                                                                                                                                                                                                                                                                               |
|--------|-------------|-----------------------------------------------------------------------------------------------------------------------------------------------------------------------------------------------------------------------------------------------------------------------------------------------------------------------------------------------------------------------------------------------------------------------------------------------------------------------------------------------|
| P19096 | FAS_MOUSE   | Fatty acid synthase (EC 2.3.1.85) (Type I Fatty Acid Synthase) [Includes: [Acyl-carrier-protein] S-acetyltransferase (EC 2.3.1.38); [Acyl-carrier-protein] S-malonyltransferase (EC 2.3.1.39); 3-oxoacyl-[acyl-carrier-protein] synthase (EC 2.3.1.41); 3-oxoacyl-[acyl-carrier-protein] reductase (EC 1.1.1.100); 3-hydroxyacyl-[acyl-carrier-protein] dehydratase (EC 4.2.1.59); Enoyl-[acyl-carrier-protein] reductase (EC 1.3.1.39); Acyl-[acyl-carrier-protein] hydrolase (EC 3.1.2.14)] |
| Q8CIB5 | FERM2_MOUSE | Fermitin family homolog 2 (Kindlin-2) (Pleckstrin homology domain-containing family C member 1)                                                                                                                                                                                                                                                                                                                                                                                               |
| Q8K1B8 | URP2_MOUSE  | Fermitin family homolog 3 (Kindlin-3) (Unc-112-related protein 2)                                                                                                                                                                                                                                                                                                                                                                                                                             |
| P09528 | FRIH_MOUSE  | Ferritin heavy chain (Ferritin H subunit) (EC 1.16.3.1) [Cleaved into: Ferritin heavy chain, N-terminally processed]                                                                                                                                                                                                                                                                                                                                                                          |
| P29391 | FRIL1_MOUSE | Ferritin light chain 1 (Ferritin L subunit 1)                                                                                                                                                                                                                                                                                                                                                                                                                                                 |
| P49945 | FRIL2_MOUSE | Ferritin light chain 2 (Ferritin L subunit 2) (Ferritin subunit LG)                                                                                                                                                                                                                                                                                                                                                                                                                           |
| Q61554 | FBN1_MOUSE  | Fibrillin-1 [Cleaved into: Asprosin]                                                                                                                                                                                                                                                                                                                                                                                                                                                          |
| Q61555 | FBN2_MOUSE  | Fibrillin-2 [Cleaved into: Fibrillin-2 C-terminal peptide]                                                                                                                                                                                                                                                                                                                                                                                                                                    |
| E9PV24 | FIBA_MOUSE  | Fibrinogen alpha chain [Cleaved into: Fibrinopeptide A; Fibrinogen alpha chain]                                                                                                                                                                                                                                                                                                                                                                                                               |
| Q8K0E8 | FIBB_MOUSE  | Fibrinogen beta chain [Cleaved into: Fibrinopeptide B; Fibrinogen beta chain]                                                                                                                                                                                                                                                                                                                                                                                                                 |
| Q8VCM7 | FIBG_MOUSE  | Fibrinogen gamma chain                                                                                                                                                                                                                                                                                                                                                                                                                                                                        |
| P50608 | FMOD_MOUSE  | Fibromodulin (FM) (Collagen-binding 59 kDa protein) (Keratan sulfate proteoglycan fibromodulin) (KSPG fibromodulin)                                                                                                                                                                                                                                                                                                                                                                           |
| P11276 | FINC_MOUSE  | Fibronectin (FN) [Cleaved into: Anastellin]                                                                                                                                                                                                                                                                                                                                                                                                                                                   |
| Q08879 | FBLN1_MOUSE | Fibulin-1 (FBL-1) (Basement-membrane protein 90) (BM-90)                                                                                                                                                                                                                                                                                                                                                                                                                                      |
| P37889 | FBLN2_MOUSE | Fibulin-2 (FBL-2)                                                                                                                                                                                                                                                                                                                                                                                                                                                                             |
| Q8BTM8 | FLNA_MOUSE  | Filamin-A (FLN-A) (Actin-binding protein 280) (ABP-280) (Alpha-filamin) (Endothelial actin-binding protein) (Filamin-1) (Non-muscle filamin)                                                                                                                                                                                                                                                                                                                                                  |
| Q80X90 | FLNB_MOUSE  | Filamin-B (FLN-B) (ABP-280-like protein) (Actin-binding-like protein) (Beta-filamin)                                                                                                                                                                                                                                                                                                                                                                                                          |
| Q8VHX6 | FLNC_MOUSE  | Filamin-C (FLN-C) (ABP-280-like protein) (ABP-L) (Actin-binding-like protein) (Filamin-2) (Gamma-filamin)                                                                                                                                                                                                                                                                                                                                                                                     |

|                            |                                          |                                                                                                                                                                                                                                     |
|----------------------------|------------------------------------------|-------------------------------------------------------------------------------------------------------------------------------------------------------------------------------------------------------------------------------------|
| Q923D2<br>P47931           | BLVRB_MOUSE<br>FST_MOUSE                 | Flavin reductase (NADPH) (FR) (EC 1.5.1.30) (Biliverdin reductase B) (BVR-B) (EC 1.3.1.24) (Biliverdin-IX beta-reductase) (NADPH-dependent diaphorase) (NADPH-flavin reductase) (FLR)<br>Follistatin (FS) (Activin-binding protein) |
| P97447<br>P70213           | FHL1_MOUSE<br>FV1_MOUSE                  | Four and a half LIM domains protein 1 (FHL-1) (KyoT) (RBP-associated molecule 14-1) (RAM14-1) (Skeletal muscle LIM-protein 1) (SLIM) (SLIM-1)<br>Friend virus susceptibility protein 1                                              |
| Q9QXD6                     | F16P1_MOUSE                              | Fructose-1,6-bisphosphatase 1 (FBPase 1) (EC 3.1.3.11) (D-fructose-1,6-bisphosphate 1-phosphohydrolase 1) (Fructose-1,6-bisphosphatase isozyme 3) (FBPase 3) (Liver FBPase)                                                         |
| P70695                     | F16P2_MOUSE                              | Fructose-1,6-bisphosphatase isozyme 2 (FBPase 2) (EC 3.1.3.11) (D-fructose-1,6-bisphosphate 1-phosphohydrolase 2) (Muscle FBPase) (RAE-30)                                                                                          |
| P05064                     | ALDOA_MOUSE                              | Fructose-bisphosphate aldolase A (EC 4.1.2.13) (Aldolase 1) (Muscle-type aldolase)                                                                                                                                                  |
| Q91Y97<br>P97807           | ALDOB_MOUSE<br>FUMH_MOUSE                | Fructose-bisphosphate aldolase B (EC 4.1.2.13) (Aldolase 2) (Liver-type aldolase)<br>Fumarate hydratase, mitochondrial (Fumarase) (EC 4.2.1.2) (EF-3)                                                                               |
| Q3TC72<br>Q9R0N0<br>Q8K157 | FAHD2_MOUSE<br>GALK1_MOUSE<br>GALM_MOUSE | Fumarylacetoacetate hydrolase domain-containing protein 2A (EC 3.-.-.-)<br>Galactokinase (EC 2.7.1.6) (Galactose kinase)<br>Galactose mutarotase (EC 5.1.3.3) (Aldose 1-epimerase)                                                  |
| P16045                     | LEG1_MOUSE                               | Galectin-1 (Gal-1) (14 kDa lectin) (Beta-galactoside-binding lectin L-14-I) (Galaptin) (Lactose-binding lectin 1) (Lectin galactoside-binding soluble 1) (S-Lac lectin 1)                                                           |
| Q07797                     | LG3BP_MOUSE                              | Galectin-3-binding protein (Cyp-C-associated protein) (CyCAP) (Lectin galactoside-binding soluble 3-binding protein) (Protein MAMA)                                                                                                 |
| Q8VED9                     | LEGL_MOUSE                               | Galectin-related protein (Galectin-related protein A) (Lectin galactoside-binding-like protein A)                                                                                                                                   |
| Q9Z0L8                     | GGH_MOUSE                                | Gamma-glutamyl hydrolase (EC 3.4.19.9) (Conjugase) (FGPH) (Folylpolyglutamate hydrolase) (GH) (Gamma-Glu-x carboxypeptidase)                                                                                                        |

|        |             |                                                                                                                                                                                                                                      |
|--------|-------------|--------------------------------------------------------------------------------------------------------------------------------------------------------------------------------------------------------------------------------------|
| P23591 | FCL_MOUSE   | GDP-L-fucose synthase (EC 1.1.1.271) (GDP-4-keto-6-deoxy-D-mannose-3,5-epimerase-4-reductase) (Protein FX) (Red cell NADP(H)-binding protein) (Transplantation antigen P35B) (Tum-P35B antigen)                                      |
| P13020 | GELS_MOUSE  | Gelsolin (Actin-depolymerizing factor) (ADF) (Brevin)                                                                                                                                                                                |
| Q9Z1Z0 | USO1_MOUSE  | General vesicular transport factor p115 (Protein USO1 homolog) (Transcytosis-associated protein) (TAP) (Vesicle-docking protein)                                                                                                     |
| Q07235 | GDN_MOUSE   | Glia-derived nexin (GDN) (Peptidase inhibitor 7) (PI-7) (Protease nexin 1) (PN-1) (Protease nexin I) (Serine protease-inhibitor 4) (Serpine E2)                                                                                      |
| Q9JK38 | GNA1_MOUSE  | Glucosamine 6-phosphate N-acetyltransferase (EC 2.3.1.4) (Phosphoglucosamine acetylase) (Phosphoglucosamine transacetylase) (Protein EMeg32)                                                                                         |
| Q00612 | G6PD1_MOUSE | Glucose-6-phosphate 1-dehydrogenase X (G6PD) (EC 1.1.1.49)                                                                                                                                                                           |
| P06745 | G6PI_MOUSE  | Glucose-6-phosphate isomerase (GPI) (EC 5.3.1.9) (Autocrine motility factor) (AMF) (Neuroleukin) (NLK) (Phosphoglucose isomerase) (PGI) (Phosphohexose isomerase) (PHI)                                                              |
| P97494 | GSH1_MOUSE  | Glutamate--cysteine ligase catalytic subunit (EC 6.3.2.2) (GCS heavy chain) (Gamma-ECS) (Gamma-glutamylcysteine synthetase)                                                                                                          |
| O09172 | GSH0_MOUSE  | Glutamate--cysteine ligase regulatory subunit (GCS light chain) (Gamma-ECS regulatory subunit) (Gamma-glutamylcysteine synthetase regulatory subunit) (Glutamate--cysteine ligase modifier subunit)                                  |
| P47856 | GFPT1_MOUSE | Glutamine--fructose-6-phosphate aminotransferase [isomerizing] 1 (EC 2.6.1.16) (D-fructose-6-phosphate amidotransferase 1) (Glutamine:fructose-6-phosphate amidotransferase 1) (GFAT 1) (GFAT1) (Hexosephosphate aminotransferase 1) |
| Q9CYK2 | QPCT_MOUSE  | Glutaminyl-peptide cyclotransferase (EC 2.3.2.5) (Glutaminyl cyclase) (QC) (Glutaminyl-tRNA cyclotransferase)                                                                                                                        |
| P11352 | GPX1_MOUSE  | Glutathione peroxidase 1 (GPx-1) (GSHPx-1) (EC 1.11.1.9) (Cellular glutathione peroxidase) (Selenium-dependent glutathione peroxidase 1)                                                                                             |
| P46412 | GPX3_MOUSE  | Glutathione peroxidase 3 (GPx-3) (GSHPx-3) (EC 1.11.1.9) (Plasma glutathione peroxidase) (GPx-P) (GSHPx-P)                                                                                                                           |

|        |             |                                                                                                                                                                                                                                                                                                                       |
|--------|-------------|-----------------------------------------------------------------------------------------------------------------------------------------------------------------------------------------------------------------------------------------------------------------------------------------------------------------------|
| P13745 | GSTA1_MOUSE | Glutathione S-transferase A1 (EC 2.5.1.18) (13-hydroperoxyoctadecadienoate peroxidase) (EC 1.11.1.-) (Androst-5-ene-3,17-dione isomerase) (EC 5.3.3.-) (GST class-alpha member 1) (Glutathione S-transferase Ya) (Glutathione S-transferase Ya1) [Cleaved into: Glutathione S-transferase A1, N-terminally processed] |
| P30115 | GSTA3_MOUSE | Glutathione S-transferase A3 (EC 2.5.1.18) (GST class-alpha member 3) (Glutathione S-transferase Ya3) (Glutathione S-transferase Yc)                                                                                                                                                                                  |
| P48774 | GSTM5_MOUSE | Glutathione S-transferase Mu 5 (EC 2.5.1.18) (Fibrous sheath component 2) (Fsc2) (GST class-mu 5)                                                                                                                                                                                                                     |
| O09131 | GSTO1_MOUSE | Glutathione S-transferase omega-1 (GSTO-1) (EC 2.5.1.18) (Glutathione S-transferase omega 1-1) (GSTO 1-1) (Glutathione-dependent dehydroascorbate reductase) (EC 1.8.5.1) (Monomethylarsonic acid reductase) (MMA(V) reductase) (EC 1.20.4.2) (S-(Phenacyl)glutathione reductase) (SPG-R) (p28)                       |
| Q8K2Q2 | GSTO2_MOUSE | Glutathione S-transferase omega-2 (GSTO-2) (EC 2.5.1.18) (Glutathione S-transferase omega 2-2) (GSTO 2-2) (Glutathione-dependent dehydroascorbate reductase) (EC 1.8.5.1) (Monomethylarsonic acid reductase) (MMA(V) reductase) (EC 1.20.4.2)                                                                         |
| P19157 | GSTP1_MOUSE | Glutathione S-transferase P 1 (Gst P1) (EC 2.5.1.18) (GST YF-YF) (GST class-pi) (GST-piB) (Preadipocyte growth factor)                                                                                                                                                                                                |
| P16858 | G3P_MOUSE   | Glyceraldehyde-3-phosphate dehydrogenase (GAPDH) (EC 1.2.1.12) (Peptidyl-cysteine S-nitrosylase GAPDH) (EC 2.6.99.-)                                                                                                                                                                                                  |
| P13707 | GPDA_MOUSE  | Glycerol-3-phosphate dehydrogenase [NAD(+)], cytoplasmic (GPD-C) (GPDH-C) (EC 1.1.1.8)                                                                                                                                                                                                                                |
| Q9CZD3 | GARS_MOUSE  | Glycine--tRNA ligase (EC 6.1.1.14) (Diadenosine tetraphosphate synthetase) (Ap4A synthetase) (EC 2.7.7.-) (Glycyl-tRNA synthetase 1) (GlyRS)                                                                                                                                                                          |
| Q8CI94 | PYGB_MOUSE  | Glycogen phosphorylase, brain form (EC 2.4.1.1)                                                                                                                                                                                                                                                                       |
| Q9ET01 | PYGL_MOUSE  | Glycogen phosphorylase, liver form (EC 2.4.1.1)                                                                                                                                                                                                                                                                       |
| Q9WUB3 | PYGM_MOUSE  | Glycogen phosphorylase, muscle form (EC 2.4.1.1) (Myophosphorylase)                                                                                                                                                                                                                                                   |
| Q9R062 | GLYG_MOUSE  | Glycogenin-1 (GN-1) (GN1) (EC 2.4.1.186)                                                                                                                                                                                                                                                                              |
| Q9CPV4 | GLOD4_MOUSE | Glyoxalase domain-containing protein 4                                                                                                                                                                                                                                                                                |

|        |             |                                                                                                                                                     |
|--------|-------------|-----------------------------------------------------------------------------------------------------------------------------------------------------|
| Q91Z53 | GRHPR_MOUSE | Glyoxylate reductase/hydroxypyruvate reductase (EC 1.1.1.79) (EC 1.1.1.81)                                                                          |
| Q9QZF2 | GPC1_MOUSE  | Glypican-1 [Cleaved into: Secreted glypican-1]                                                                                                      |
| P51655 | GPC4_MOUSE  | Glypican-4 (K-glypican) [Cleaved into: Secreted glypican-4]                                                                                         |
| Q9R087 | GPC6_MOUSE  | Glypican-6 [Cleaved into: Secreted glypican-6]                                                                                                      |
| Q9DCZ1 | GMPR1_MOUSE | GMP reductase 1 (GMPR 1) (EC 1.7.1.7) (Guanosine 5'-monophosphate oxidoreductase 1)                                                                 |
| Q3UY90 | GAK1A_MOUSE | (Guanosine monophosphate reductase 1)<br>Golgi-associated kinase 1A (Protein FAM198A)                                                               |
| Q9CYL5 | GAPR1_MOUSE | Golgi-associated plant pathogenesis-related protein 1 (GAPR-1) (Golgi-associated PR-1 protein)<br>(Glioma pathogenesis-related protein 2) (GliPR 2) |
| P62827 | RAN_MOUSE   | GTP-binding nuclear protein Ran (GTPase Ran) (Ras-like protein TC4) (Ras-related nuclear protein)                                                   |
| Q35969 | GAMT_MOUSE  | Guanidinoacetate N-methyltransferase (EC 2.1.1.2)                                                                                                   |
| P08752 | GNAI2_MOUSE | Guanine nucleotide-binding protein G(i) subunit alpha-2 (Adenylate cyclase-inhibiting G alpha protein)                                              |
| P62874 | GBB1_MOUSE  | Guanine nucleotide-binding protein G(l)/G(s)/G(t) subunit beta-1 (Transducin beta chain 1)                                                          |
| P62880 | GBB2_MOUSE  | Guanine nucleotide-binding protein G(l)/G(s)/G(t) subunit beta-2 (G protein subunit beta-2)<br>(Transducin beta chain 2)                            |
| Q61646 | HPT_MOUSE   | Haptoglobin [Cleaved into: Haptoglobin alpha chain; Haptoglobin beta chain]                                                                         |
| Q8BM72 | HSP13_MOUSE | Heat shock 70 kDa protein 13 (Microsomal stress-70 protein ATPase core) (Stress-70 protein chaperone microsome-associated 60 kDa protein)           |
| Q61696 | HS71A_MOUSE | Heat shock 70 kDa protein 1A (Heat shock 70 kDa protein 3) (HSP70.3) (Hsp68)                                                                        |
| P17879 | HS71B_MOUSE | Heat shock 70 kDa protein 1B (Heat shock 70 kDa protein 1) (HSP70.1)                                                                                |
| P16627 | HS71L_MOUSE | Heat shock 70 kDa protein 1-like (Heat shock 70 kDa protein 1L) (Heat shock 70 kDa-like protein 1)<br>(Spermatid-specific heat shock protein 70)    |
| Q61316 | HSP74_MOUSE | Heat shock 70 kDa protein 4 (Heat shock 70-related protein APG-2)                                                                                   |



|        |             |                                                                                                                                                                                                  |
|--------|-------------|--------------------------------------------------------------------------------------------------------------------------------------------------------------------------------------------------|
| P63017 | HSP7C_MOUSE | Heat shock cognate 71 kDa protein (EC 3.6.4.10) (Heat shock 70 kDa protein 8)                                                                                                                    |
| P14602 | HSPB1_MOUSE | Heat shock protein beta-1 (HspB1) (Growth-related 25 kDa protein) (Heat shock 25 kDa protein) (HSP 25) (Heat shock 27 kDa protein) (HSP 27) (p25)                                                |
| P07901 | HS90A_MOUSE | Heat shock protein HSP 90-alpha (EC 3.6.4.10) (Heat shock 86 kDa) (HSP 86) (HSP86) (Tumor-specific transplantation 86 kDa antigen) (TSTA)                                                        |
| P11499 | HS90B_MOUSE | Heat shock protein HSP 90-beta (Heat shock 84 kDa) (HSP 84) (HSP84) (Tumor-specific transplantation 84 kDa antigen) (TSTA)                                                                       |
| Q9R257 | HEBP1_MOUSE | Heme-binding protein 1 (p22HBP)                                                                                                                                                                  |
| D3YXG0 | HMCN1_MOUSE | Hemicentin-1 (Fibulin-6) (FIBL-6)                                                                                                                                                                |
| A2AJ76 | HMCN2_MOUSE | Hemicentin-2                                                                                                                                                                                     |
| P01942 | HBA_MOUSE   | Hemoglobin subunit alpha (Alpha-globin) (Hemoglobin alpha chain)                                                                                                                                 |
| P02088 | HBB1_MOUSE  | Hemoglobin subunit beta-1 (Beta-1-globin) (Hemoglobin beta-1 chain) (Hemoglobin beta-major chain)                                                                                                |
| P02104 | HBE_MOUSE   | Hemoglobin subunit epsilon-Y2 (Epsilon-Y2-globin) (Hemoglobin epsilon-Y2 chain)                                                                                                                  |
| P49182 | HEP2_MOUSE  | Heparin cofactor 2 (Heparin cofactor II) (HC-II) (Protease inhibitor leuserpin-2) (Serpin D1)                                                                                                    |
| Q9R098 | HGFA_MOUSE  | Hepatocyte growth factor activator (HGF activator) (HGFA) (EC 3.4.21.-) [Cleaved into: Hepatocyte growth factor activator short chain; Hepatocyte growth factor activator long chain]            |
| P26928 | HGFL_MOUSE  | Hepatocyte growth factor-like protein (Macrophage stimulatory protein) (MSP) [Cleaved into: Hepatocyte growth factor-like protein alpha chain; Hepatocyte growth factor-like protein beta chain] |
| Q9Z2X1 | HNRPF_MOUSE | Heterogeneous nuclear ribonucleoprotein F (hnRNP F) [Cleaved into: Heterogeneous nuclear ribonucleoprotein F, N-terminally processed]                                                            |
| P61979 | HNRPK_MOUSE | Heterogeneous nuclear ribonucleoprotein K (hnRNP K)                                                                                                                                              |
| P63158 | HMGB1_MOUSE | High mobility group protein B1 (High mobility group protein 1) (HMG-1)                                                                                                                           |
| Q61035 | HARS1_MOUSE | Histidine--tRNA ligase, cytoplasmic (EC 6.1.1.21) (Histidyl-tRNA synthetase) (HisRS)                                                                                                             |

|        |             |                                                                                                                                                                                                                         |
|--------|-------------|-------------------------------------------------------------------------------------------------------------------------------------------------------------------------------------------------------------------------|
| P15864 | H12_MOUSE   | Histone H1.2 (H1 VAR.1) (H1c)                                                                                                                                                                                           |
| P43277 | H13_MOUSE   | Histone H1.3 (H1 VAR.4) (H1d)                                                                                                                                                                                           |
| C0HKE1 | H2A1B_MOUSE | Histone H2A type 1-B                                                                                                                                                                                                    |
| C0HKE2 | H2A1C_MOUSE | Histone H2A type 1-C (H2A-clustered histone 6)                                                                                                                                                                          |
| C0HKE3 | H2A1D_MOUSE | Histone H2A type 1-D                                                                                                                                                                                                    |
| C0HKE4 | H2A1E_MOUSE | Histone H2A type 1-E                                                                                                                                                                                                    |
| Q8CGP5 | H2A1F_MOUSE | Histone H2A type 1-F                                                                                                                                                                                                    |
| C0HKE5 | H2A1G_MOUSE | Histone H2A type 1-G                                                                                                                                                                                                    |
| Q8CGP6 | H2A1H_MOUSE | Histone H2A type 1-H (H2A-clustered histone 12)                                                                                                                                                                         |
| C0HKE6 | H2A1I_MOUSE | Histone H2A type 1-I                                                                                                                                                                                                    |
| Q8CGP7 | H2A1K_MOUSE | Histone H2A type 1-K                                                                                                                                                                                                    |
| C0HKE7 | H2A1N_MOUSE | Histone H2A type 1-N                                                                                                                                                                                                    |
| C0HKE8 | H2A1O_MOUSE | Histone H2A type 1-O                                                                                                                                                                                                    |
| C0HKE9 | H2A1P_MOUSE | Histone H2A type 1-P                                                                                                                                                                                                    |
| Q6GSS7 | H2A2A_MOUSE | Histone H2A type 2-A (H2a-614) (H2a-615) (Histone H2A.2)                                                                                                                                                                |
| Q64523 | H2A2C_MOUSE | Histone H2A type 2-C (H2A-clustered histone 20) (H2a-613B)                                                                                                                                                              |
| Q8BFU2 | H2A3_MOUSE  | Histone H2A type 3                                                                                                                                                                                                      |
| Q8R1M2 | H2AJ_MOUSE  | Histone H2A.J (H2a/j)                                                                                                                                                                                                   |
| Q64475 | H2B1B_MOUSE | Histone H2B type 1-B (H2B-clustered histone 3) (h2B-143)                                                                                                                                                                |
| Q6ZWY9 | H2B1C_MOUSE | Histone H2B type 1-C/E/G                                                                                                                                                                                                |
| P10853 | H2B1F_MOUSE | Histone H2B type 1-F/J/L (H2B 291A)                                                                                                                                                                                     |
| Q64478 | H2B1H_MOUSE | Histone H2B type 1-H (H2B-clustered histone 9) (h2B-221)                                                                                                                                                                |
| Q8CGP1 | H2B1K_MOUSE | Histone H2B type 1-K                                                                                                                                                                                                    |
| P10854 | H2B1M_MOUSE | Histone H2B type 1-M (H2B 291B)                                                                                                                                                                                         |
| Q8CGP2 | H2B1P_MOUSE | Histone H2B type 1-P                                                                                                                                                                                                    |
| Q64525 | H2B2B_MOUSE | Histone H2B type 2-B (H2b 616)                                                                                                                                                                                          |
|        |             | Histone H3.2 (H3-clustered histone 13) (H3-clustered histone 14) (H3-clustered histone 15) (H3-clustered histone 2) (H3-clustered histone 3) (H3-clustered histone 4) (H3-clustered histone 6) (H3-clustered histone 7) |
| P84228 | H32_MOUSE   |                                                                                                                                                                                                                         |
| P84244 | H33_MOUSE   | Histone H3.3                                                                                                                                                                                                            |
| P02301 | H3C_MOUSE   | Histone H3.3C (Embryonic)                                                                                                                                                                                               |
| P62806 | H4_MOUSE    | Histone H4                                                                                                                                                                                                              |

|        |             |                                                                                                                                                                                                                                               |
|--------|-------------|-----------------------------------------------------------------------------------------------------------------------------------------------------------------------------------------------------------------------------------------------|
| Q99MY8 | ASH1L_MOUSE | Histone-lysine N-methyltransferase ASH1L (EC 2.1.1.359) (EC 2.1.1.367) (ASH1-like protein) (Absent small and homeotic disks protein 1 homolog)                                                                                                |
| O09173 | HGD_MOUSE   | Homogentisate 1,2-dioxygenase (EC 1.13.11.5) (Homogentisate oxygenase) (Homogentisic acid oxidase) (Homogentisicase)                                                                                                                          |
| Q9QUP5 | HPLN1_MOUSE | Hyaluronan and proteoglycan link protein 1 (Cartilage-linking protein 1) (Cartilage-link protein) (Proteoglycan link protein)                                                                                                                 |
| Q8JZK9 | HMCS1_MOUSE | Hydroxymethylglutaryl-CoA synthase, cytoplasmic (HMG-CoA synthase) (EC 2.3.3.10) (3-hydroxy-3-methylglutaryl coenzyme A synthase)                                                                                                             |
| Q9JKR6 | HYOU1_MOUSE | Hypoxia up-regulated protein 1 (GRP-170) (140 kDa Ca(2+)-binding protein) (CBP-140)                                                                                                                                                           |
| P01872 | IGHM_MOUSE  | Immunoglobulin heavy constant mu [Cleaved into: Mu' chain (55 kDa mu' chain)]                                                                                                                                                                 |
| Q3V1M1 | IGS10_MOUSE | Immunoglobulin superfamily member 10 (IgSF10)                                                                                                                                                                                                 |
| Q8R366 | IGSF8_MOUSE | Immunoglobulin superfamily member 8 (IgSF8) (CD81 partner 3) (Glu-Trp-Ile EWI motif-containing protein 2) (EWI-2) (Keratinocyte-associated transmembrane protein 4) (KCT-4) (Prostaglandin regulatory-like protein) (PGRL) (CD antigen CD316) |
| P70168 | IMB1_MOUSE  | Importin subunit beta-1 (Karyopherin subunit beta-1) (Nuclear factor p97) (Pore targeting complex 97 kDa subunit) (PTAC97) (SCG)                                                                                                              |
| Q8BKG3 | PTK7_MOUSE  | Inactive tyrosine-protein kinase 7 (Protein chuzhoi) (Protein-tyrosine kinase 7) (Pseudo tyrosine kinase receptor 7) (Tyrosine-protein kinase-like 7)                                                                                         |
| P09535 | IGF2_MOUSE  | Insulin-like growth factor II (IGF-II) (Multiplication-stimulating polypeptide) [Cleaved into: Insulin-like growth factor II; Preptin]                                                                                                        |
| P47877 | IBP2_MOUSE  | Insulin-like growth factor-binding protein 2 (IBP-2) (IGF-binding protein 2) (IGFBP-2) (mIGFBP-2)                                                                                                                                             |
| P47880 | IBP6_MOUSE  | Insulin-like growth factor-binding protein 6 (IBP-6) (IGF-binding protein 6) (IGFBP-6)                                                                                                                                                        |
| P70389 | ALS_MOUSE   | Insulin-like growth factor-binding protein complex acid labile subunit (ALS)                                                                                                                                                                  |

|        |             |                                                                                                                                                                                                                    |
|--------|-------------|--------------------------------------------------------------------------------------------------------------------------------------------------------------------------------------------------------------------|
| P11688 | ITA5_MOUSE  | Integrin alpha-5 (CD49 antigen-like family member E) (Fibronectin receptor subunit alpha) (Integrin alpha-F) (VLA-5) (CD antigen CD49e) [Cleaved into: Integrin alpha-5 heavy chain; Integrin alpha-5 light chain] |
| P09055 | ITB1_MOUSE  | Integrin beta-1 (Fibronectin receptor subunit beta) (VLA-4 subunit beta) (CD antigen CD29)                                                                                                                         |
| O55222 | ILK_MOUSE   | Integrin-linked protein kinase (EC 2.7.11.1) (59 kDa serine/threonine-protein kinase) (Beta-integrin-linked kinase) (ILK-1) (ILK-2) (p59ILK)                                                                       |
| A6X935 | ITIH4_MOUSE | Inter alpha-trypsin inhibitor, heavy chain 4 (ITI heavy chain H4) (ITI-HC4) (Inter-alpha-inhibitor heavy chain 4)                                                                                                  |
| Q61702 | ITIH1_MOUSE | Inter-alpha-trypsin inhibitor heavy chain H1 (ITI heavy chain H1) (ITI-HC1) (Inter-alpha-inhibitor heavy chain 1)                                                                                                  |
| Q61703 | ITIH2_MOUSE | Inter-alpha-trypsin inhibitor heavy chain H2 (ITI heavy chain H2) (ITI-HC2) (Inter-alpha-inhibitor heavy chain 2)                                                                                                  |
| Q61704 | ITIH3_MOUSE | Inter-alpha-trypsin inhibitor heavy chain H3 (ITI heavy chain H3) (ITI-HC3) (Inter-alpha-inhibitor heavy chain 3)                                                                                                  |
| O88844 | IDHC_MOUSE  | Isocitrate dehydrogenase [NADP] cytoplasmic (IDH) (EC 1.1.1.42) (Cytosolic NADP-isocitrate dehydrogenase) (IDP) (NADP(+)-specific ICDH) (Oxalosuccinate decarboxylase)                                             |
| Q02257 | PLAK_MOUSE  | Junction plakoglobin (Desmoplakin III) (Desmoplakin-3)                                                                                                                                                             |
| P02535 | K1C10_MOUSE | Keratin, type I cytoskeletal 10 (56 kDa cytokeratin) (Cytokeratin-10) (CK-10) (Keratin, type I cytoskeletal 59 kDa) (Keratin-10) (K10)                                                                             |
| Q64291 | K1C12_MOUSE | Keratin, type I cytoskeletal 12 (Cytokeratin-12) (CK-12) (Keratin-12) (K12)                                                                                                                                        |
| Q61781 | K1C14_MOUSE | Keratin, type I cytoskeletal 14 (Cytokeratin-14) (CK-14) (Keratin-14) (K14)                                                                                                                                        |
| Q61414 | K1C15_MOUSE | Keratin, type I cytoskeletal 15 (Cytokeratin-15) (CK-15) (Keratin-15) (K15)                                                                                                                                        |
| Q9Z2K1 | K1C16_MOUSE | Keratin, type I cytoskeletal 16 (Cytokeratin-16) (CK-16) (Keratin-16) (K16)                                                                                                                                        |
| Q6IFX2 | K1C42_MOUSE | Keratin, type I cytoskeletal 42 (Cytokeratin-42) (CK-42) (Keratin-17n) (Keratin-42) (K42) (Type I keratin Ka22)                                                                                                    |
| P04104 | K2C1_MOUSE  | Keratin, type II cytoskeletal 1 (67 kDa cytokeratin) (Cytokeratin-1) (CK-1) (Keratin-1) (K1) (Type-II keratin Kb1)                                                                                                 |

|        |             |                                                                                                                                                                                                                                                |
|--------|-------------|------------------------------------------------------------------------------------------------------------------------------------------------------------------------------------------------------------------------------------------------|
| Q3TTY5 | K22E_MOUSE  | Keratin, type II cytoskeletal 2 epidermal (Cytokeratin-2e) (CK-2e) (Epithelial keratin-2e) (Keratin-2 epidermis) (Keratin-2e) (K2e) (Type-II keratin Kb2)                                                                                      |
| Q3UV17 | K22O_MOUSE  | Keratin, type II cytoskeletal 2 oral (Keratin-76) (K76) (Type-II keratin Kb9)                                                                                                                                                                  |
| Q922U2 | K2C5_MOUSE  | Keratin, type II cytoskeletal 5 (Cytokeratin-5) (CK-5) (Keratin-5) (K5) (Type-II keratin Kb5)                                                                                                                                                  |
| P50446 | K2C6A_MOUSE | Keratin, type II cytoskeletal 6A (Cytokeratin-6A) (CK-6A) (Keratin-6-alpha) (mK6-alpha) (Keratin-6A) (K6A)                                                                                                                                     |
| Q8VED5 | K2C79_MOUSE | Keratin, type II cytoskeletal 79 (Cytokeratin-79) (CK-79) (Keratin-79) (K79) (Type-II keratin Kb38)                                                                                                                                            |
| P11679 | K2C8_MOUSE  | Keratin, type II cytoskeletal 8 (Cytokeratin endo A) (Cytokeratin-8) (CK-8) (Keratin-8) (K8) (Type-II keratin Kb8)                                                                                                                             |
| Q66JQ7 | KNL1_MOUSE  | Kinetochore scaffold 1 (Cancer susceptibility candidate gene 5 protein homolog) (Kinetochore-null protein 1) (Protein CASC5)                                                                                                                   |
| O08677 | KNG1_MOUSE  | Kininogen-1 [Cleaved into: Kininogen-1 heavy chain; Bradykinin; Kininogen-1 light chain]                                                                                                                                                       |
| Q9CXF0 | KYNU_MOUSE  | Kynureninase (EC 3.7.1.3) (L-kynurenine hydrolase)                                                                                                                                                                                             |
| P21956 | MFGM_MOUSE  | Lactadherin (MFGM) (Milk fat globule-EGF factor 8) (MFG-E8) (SED1) (Sperm surface protein SP47) (MP47)                                                                                                                                         |
| Q60675 | LAMA2_MOUSE | Laminin subunit alpha-2 (Laminin M chain) (Laminin-12 subunit alpha) (Laminin-2 subunit alpha) (Laminin-4 subunit alpha) (Merosin heavy chain)                                                                                                 |
| P97927 | LAMA4_MOUSE | Laminin subunit alpha-4 (Laminin-14 subunit alpha) (Laminin-8 subunit alpha) (Laminin-9 subunit alpha)                                                                                                                                         |
| Q61001 | LAMA5_MOUSE | Laminin subunit alpha-5 (Laminin-10 subunit alpha) (Laminin-11 subunit alpha) (Laminin-15 subunit alpha)                                                                                                                                       |
| P02469 | LAMB1_MOUSE | Laminin subunit beta-1 (Laminin B1 chain) (Laminin-1 subunit beta) (Laminin-10 subunit beta) (Laminin-12 subunit beta) (Laminin-2 subunit beta) (Laminin-6 subunit beta) (Laminin-8 subunit beta)                                              |
| Q61292 | LAMB2_MOUSE | Laminin subunit beta-2 (Laminin-11 subunit beta) (Laminin-14 subunit beta) (Laminin-15 subunit beta) (Laminin-3 subunit beta) (Laminin-4 subunit beta) (Laminin-7 subunit beta) (Laminin-9 subunit beta) (S-laminin subunit beta) (S-LAM beta) |

|                  |                            |                                                                                                                                                                                                                                                                                                                                                                                                                               |
|------------------|----------------------------|-------------------------------------------------------------------------------------------------------------------------------------------------------------------------------------------------------------------------------------------------------------------------------------------------------------------------------------------------------------------------------------------------------------------------------|
| P02468<br>O08999 | LAMC1_MOUSE<br>LTBP2_MOUSE | Laminin subunit gamma-1 (Laminin B2 chain) (Laminin-1 subunit gamma) (Laminin-10 subunit gamma) (Laminin-11 subunit gamma) (Laminin-2 subunit gamma) (Laminin-3 subunit gamma) (Laminin-4 subunit gamma) (Laminin-6 subunit gamma) (Laminin-7 subunit gamma) (Laminin-8 subunit gamma) (Laminin-9 subunit gamma) (S-laminin subunit gamma) (S-LAM gamma)<br>Latent-transforming growth factor beta-binding protein 2 (LTBP-2) |
| Q91WK0           | LRRF2_MOUSE                | Leucine-rich repeat flightless-interacting protein 2 (LRR FLII-interacting protein 2)                                                                                                                                                                                                                                                                                                                                         |
| P24527           | LKHA4_MOUSE                | Leukotriene A-4 hydrolase (LTA-4 hydrolase) (EC 3.3.2.6) (Leukotriene A(4) hydrolase) (Tripeptide aminopeptidase LTA4H) (EC 3.4.11.4)                                                                                                                                                                                                                                                                                         |
| Q99JW4<br>P11152 | LIMS1_MOUSE<br>LIPL_MOUSE  | LIM and senescent cell antigen-like-containing domain protein 1 (Particularly interesting new Cys-His protein 1) (PINCH-1)<br>Lipoprotein lipase (LPL) (EC 3.1.1.34) (Phospholipase A1) (EC 3.1.1.32)                                                                                                                                                                                                                         |
| P06151           | LDHA_MOUSE                 | L-lactate dehydrogenase A chain (LDH-A) (EC 1.1.1.27) (LDH muscle subunit) (LDH-M)                                                                                                                                                                                                                                                                                                                                            |
| P16125           | LDHB_MOUSE                 | L-lactate dehydrogenase B chain (LDH-B) (EC 1.1.1.27) (LDH heart subunit) (LDH-H)                                                                                                                                                                                                                                                                                                                                             |
| Q9D358<br>P51885 | PPAC_MOUSE<br>LUM_MOUSE    | Low molecular weight phosphotyrosine protein phosphatase (LMW-PTP) (LMW-PTPase) (EC 3.1.3.48) (Low molecular weight cytosolic acid phosphatase) (EC 3.1.3.2)<br>Lumican (Keratan sulfate proteoglycan lumican) (KSPG lumican)                                                                                                                                                                                                 |
| Q91X52           | DCXR_MOUSE                 | L-xylulose reductase (XR) (EC 1.1.1.10) (Dicarbonyl/L-xylulose reductase)                                                                                                                                                                                                                                                                                                                                                     |
| Q60787           | LCP2_MOUSE                 | Lymphocyte cytosolic protein 2 (SH2 domain-containing leukocyte protein of 76 kDa) (SLP-76 tyrosine phosphoprotein) (SLP76)                                                                                                                                                                                                                                                                                                   |
| O09159           | MA2B1_MOUSE                | Lysosomal alpha-mannosidase (Laman) (EC 3.2.1.24) (Lysosomal acid alpha-mannosidase) (Mannosidase alpha class 2B member 1) (Mannosidase alpha-B)                                                                                                                                                                                                                                                                              |

|        |             |                                                                                                                                                                                                                                                                                                                                                                                                                                                            |
|--------|-------------|------------------------------------------------------------------------------------------------------------------------------------------------------------------------------------------------------------------------------------------------------------------------------------------------------------------------------------------------------------------------------------------------------------------------------------------------------------|
| P11438 | LAMP1_MOUSE | Lysosome-associated membrane glycoprotein 1 (LAMP-1) (Lysosome-associated membrane protein 1) (120 kDa lysosomal membrane glycoprotein) (CD107 antigen-like family member A) (LGP-120) (Lysosomal membrane glycoprotein A) (LGP-A) (P2B) (CD antigen CD107a)                                                                                                                                                                                               |
| P58022 | LOXL2_MOUSE | Lysyl oxidase homolog 2 (EC 1.4.3.13) (Lysyl oxidase-like protein 2)                                                                                                                                                                                                                                                                                                                                                                                       |
| P07141 | CSF1_MOUSE  | Macrophage colony-stimulating factor 1 (CSF-1) (MCSF) [Cleaved into: Processed macrophage colony-stimulating factor 1]                                                                                                                                                                                                                                                                                                                                     |
| P34884 | MIF_MOUSE   | Macrophage migration inhibitory factor (MIF) (EC 5.3.2.1) (Delayed early response protein 6) (DER6) (Glycosylation-inhibiting factor) (GIF) (L-dopachrome isomerase) (L-dopachrome tautomerase) (EC 5.3.3.12) (Phenylpyruvate tautomerase)                                                                                                                                                                                                                 |
| P14152 | MDHC_MOUSE  | Malate dehydrogenase, cytoplasmic (EC 1.1.1.37) (Cytosolic malate dehydrogenase)                                                                                                                                                                                                                                                                                                                                                                           |
| Q8CG85 | MAMC2_MOUSE | MAM domain-containing protein 2 (MAM domain-containing proteoglycan) (Mamcan)                                                                                                                                                                                                                                                                                                                                                                              |
| P98064 | MASP1_MOUSE | Mannan-binding lectin serine protease 1 (EC 3.4.21.-) (Complement factor MASP-3) (Complement-activating component of Ra-reactive factor) (Mannose-binding lectin-associated serine protease 1) (MASP-1) (Mannose-binding protein-associated serine protease) (Ra-reactive factor serine protease p100) (RaRF) (Serine protease 5) [Cleaved into: Mannan-binding lectin serine protease 1 heavy chain; Mannan-binding lectin serine protease 1 light chain] |
| Q8BTZ7 | GMPPB_MOUSE | Mannose-1-phosphate guanylyltransferase beta (EC 2.7.7.13) (GDP-mannose pyrophosphorylase B) (GTP-mannose-1-phosphate guanylyltransferase beta)                                                                                                                                                                                                                                                                                                            |
| P45700 | MA1A1_MOUSE | Mannosyl-oligosaccharide 1,2-alpha-mannosidase IA (EC 3.2.1.113) (Man(9)-alpha-mannosidase) (Man9-mannosidase) (Mannosidase alpha class 1A member 1) (Processing alpha-1,2-mannosidase IA) (Alpha-1,2-mannosidase IA)                                                                                                                                                                                                                                      |
| P19788 | MGP_MOUSE   | Matrix Gla protein (MGP)                                                                                                                                                                                                                                                                                                                                                                                                                                   |
| Q61865 | MIA_MOUSE   | Melanoma-derived growth regulatory protein (Cartilage-derived retinoic acid-sensitive protein) (CD-RAP) (Melanoma inhibitory activity protein)                                                                                                                                                                                                                                                                                                             |

|        |             |                                                                                                                                                                                                                                     |
|--------|-------------|-------------------------------------------------------------------------------------------------------------------------------------------------------------------------------------------------------------------------------------|
| P39876 | TIMP3_MOUSE | Metalloproteinase inhibitor 3 (Tissue inhibitor of metalloproteinases 3) (TIMP-3)                                                                                                                                                   |
| P02798 | MT2_MOUSE   | Metallothionein-2 (MT-2) (Metallothionein-II) (MT-II)                                                                                                                                                                               |
| P17563 | SBP1_MOUSE  | Methanethiol oxidase (MTO) (EC 1.8.3.4) (56 kDa selenium-binding protein) (SBP56) (SP56)<br>(Selenium-binding protein 1)                                                                                                            |
| Q99LB6 | MAT2B_MOUSE | Methionine adenosyltransferase 2 subunit beta (Methionine adenosyltransferase II beta) (MAT II beta)                                                                                                                                |
| Q61166 | MARE1_MOUSE | Microtubule-associated protein RP/EB family member 1 (APC-binding protein EB1) (End-binding protein 1) (EB1)                                                                                                                        |
| Q8R001 | MARE2_MOUSE | Microtubule-associated protein RP/EB family member 2 (APC-binding protein EB2) (End-binding protein 2) (EB2)                                                                                                                        |
| Q60592 | MAST2_MOUSE | Microtubule-associated serine/threonine-protein kinase 2 (EC 2.7.11.1)                                                                                                                                                              |
| Q811L6 | MAST4_MOUSE | Microtubule-associated serine/threonine-protein kinase 4 (EC 2.7.11.1)                                                                                                                                                              |
| Q62000 | MIME_MOUSE  | Mimecan (Osteoglycin)                                                                                                                                                                                                               |
| Q9CXD6 | MCUR1_MOUSE | Mitochondrial calcium uniporter regulator 1 (MCU regulator 1) (Coiled-coil domain-containing protein 90A, mitochondrial)                                                                                                            |
| Q9D6Y7 | MSRA_MOUSE  | Mitochondrial peptide methionine sulfoxide reductase (EC 1.8.4.11) (Peptide-methionine (S)-S-oxide reductase) (Peptide Met(O) reductase) (Protein-methionine-S-oxide reductase) (PMSR)                                              |
| P56501 | UCP3_MOUSE  | Mitochondrial uncoupling protein 3 (UCP 3) (Solute carrier family 25 member 9)                                                                                                                                                      |
| P63085 | MK01_MOUSE  | Mitogen-activated protein kinase 1 (MAP kinase 1) (MAPK 1) (EC 2.7.11.24) (ERT1) (Extracellular signal-regulated kinase 2) (ERK-2) (MAP kinase isoform p42) (p42-MAPK) (Mitogen-activated protein kinase 2) (MAP kinase 2) (MAPK 2) |
| P47811 | MK14_MOUSE  | Mitogen-activated protein kinase 14 (MAP kinase 14) (MAPK 14) (EC 2.7.11.24) (CRK1) (Mitogen-activated protein kinase p38 alpha) (MAP kinase p38 alpha)                                                                             |
| Q921Y0 | MOB1A_MOUSE | MOB kinase activator 1A (Mob1 homolog 1B) (Mps one binder kinase activator-like 1B)                                                                                                                                                 |
| Q8BPB0 | MOB1B_MOUSE | MOB kinase activator 1B (Mob1 homolog 1A) (Mps one binder kinase activator-like 1A)                                                                                                                                                 |



|                  |                           |                                                                                                                                                                                                                                                                                                                                                                                                 |
|------------------|---------------------------|-------------------------------------------------------------------------------------------------------------------------------------------------------------------------------------------------------------------------------------------------------------------------------------------------------------------------------------------------------------------------------------------------|
| P26041           | MOES_MOUSE                | Moesin (Membrane-organizing extension spike protein)                                                                                                                                                                                                                                                                                                                                            |
| Q9R0E1<br>P28665 | PLOD3_MOUSE<br>MUG1_MOUSE | Multifunctional procollagen lysine hydroxylase and glycosyltransferase LH3 [Includes: Procollagen-lysine,2-oxoglutarate 5-dioxygenase 3 (EC 1.14.11.4) (Lysyl hydroxylase 3) (LH3); Procollagen glycosyltransferase (EC 2.4.1.50) (EC 2.4.1.66) (Galactosylhydroxylysine-glycosyltransferase) (Procollagen galactosyltransferase) (Procollagen glycosyltransferase)]<br>Murinoglobulin-1 (MuG1) |
| O70624           | MYOC_MOUSE                | Myocilin (Trabecular meshwork-induced glucocorticoid response protein) [Cleaved into: Myocilin, N-terminal fragment (Myocilin 20 kDa N-terminal fragment); Myocilin, C-terminal fragment (Myocilin 35 kDa N-terminal fragment)]                                                                                                                                                                 |
| Q60605           | MYL6_MOUSE                | Myosin light polypeptide 6 (17 kDa myosin light chain) (LC17) (Myosin light chain 3) (MLC-3) (Myosin light chain alkali 3) (Myosin light chain A3) (Smooth muscle and nonmuscle myosin light chain alkali 6)                                                                                                                                                                                    |
| O08638           | MYH11_MOUSE               | Myosin-11 (Myosin heavy chain 11) (Myosin heavy chain, smooth muscle isoform) (SMMHC)                                                                                                                                                                                                                                                                                                           |
| Q8VDD5<br>P62774 | MYH9_MOUSE<br>MTPN_MOUSE  | Myosin-9 (Cellular myosin heavy chain, type A) (Myosin heavy chain 9) (Myosin heavy chain, non-muscle IIa) (Non-muscle myosin heavy chain A) (NMMHC-A) (Non-muscle myosin heavy chain IIa) (NMMHC II-a) (NMMHC-IIA)<br>Myotrophin (Granule cell differentiation protein) (Protein V-1)                                                                                                          |
| Q99LD8           | DDAH2_MOUSE               | N(G),N(G)-dimethylarginine dimethylaminohydrolase 2 (DDAH-2) (Dimethylarginine dimethylaminohydrolase 2) (EC 3.5.3.18) (DDAHII) (Dimethylargininase-2)                                                                                                                                                                                                                                          |
| Q80VA0           | GALT7_MOUSE               | N-acetylgalactosaminyltransferase 7 (EC 2.4.1.41) (Polypeptide GalNAc transferase 7) (GalNAc-T7) (pp-GaNTase 7) (Protein-UDP acetylgalactosaminyltransferase 7) (UDP-GalNAc:polypeptide N-acetylgalactosaminyltransferase 7)                                                                                                                                                                    |
| Q8VCS0           | PGRP2_MOUSE               | N-acetylmuramoyl-L-alanine amidase (EC 3.5.1.28) (Peptidoglycan recognition protein 2) (Peptidoglycan recognition protein long) (PGRP-L) (TagL)                                                                                                                                                                                                                                                 |

|        |             |                                                                                                                                                                                                            |
|--------|-------------|------------------------------------------------------------------------------------------------------------------------------------------------------------------------------------------------------------|
| Q9DCN2 | NB5R3_MOUSE | NADH-cytochrome b5 reductase 3 (B5R) (Cytochrome b5 reductase) (EC 1.6.2.2) (Diaphorase-1) [Cleaved into: NADH-cytochrome b5 reductase 3 membrane-bound form; NADH-cytochrome b5 reductase 3 soluble form] |
| P06801 | MAOX_MOUSE  | NADP-dependent malic enzyme (NADP-ME) (EC 1.1.1.40) (Malic enzyme 1)                                                                                                                                       |
| P61082 | UBC12_MOUSE | NEDD8-conjugating enzyme Ubc12 (EC 2.3.2.34) (NEDD8 carrier protein) (Ubiquitin-conjugating enzyme E2 M)                                                                                                   |
| P97798 | NEO1_MOUSE  | Neogenin                                                                                                                                                                                                   |
| P13595 | NCAM1_MOUSE | Neural cell adhesion molecule 1 (N-CAM-1) (NCAM-1) (CD antigen CD56)                                                                                                                                       |
| Q01705 | NOTC1_MOUSE | Neurogenic locus notch homolog protein 1 (Notch 1) (Motch A) (mT14) (p300) [Cleaved into: Notch 1 extracellular truncation (NEXT); Notch 1 intracellular domain (NICD)]                                    |
| O35516 | NOTC2_MOUSE | Neurogenic locus notch homolog protein 2 (Notch 2) (Motch B) [Cleaved into: Notch 2 extracellular truncation; Notch 2 intracellular domain]                                                                |
| Q61982 | NOTC3_MOUSE | Neurogenic locus notch homolog protein 3 (Notch 3) [Cleaved into: Notch 3 extracellular truncation; Notch 3 intracellular domain]                                                                          |
| Q62443 | NPTX1_MOUSE | Neuronal pentraxin-1 (NP1) (Neuronal pentraxin I) (NP-I)                                                                                                                                                   |
| P97333 | NRP1_MOUSE  | Neuropilin-1 (A5 protein) (CD antigen CD304)                                                                                                                                                               |
| Q8BHN3 | GANAB_MOUSE | Neutral alpha-glucosidase AB (EC 3.2.1.207) (Alpha-glucosidase 2) (Glucosidase II subunit alpha)                                                                                                           |
| P10493 | NID1_MOUSE  | Nidogen-1 (NID-1) (Entactin)                                                                                                                                                                               |
| O88322 | NID2_MOUSE  | Nidogen-2 (NID-2) (Entactin-2)                                                                                                                                                                             |
| P61971 | NTF2_MOUSE  | Nuclear transport factor 2 (NTF-2)                                                                                                                                                                         |
| Q99LH1 | NOG2_MOUSE  | Nucleolar GTP-binding protein 2                                                                                                                                                                            |
| Q61937 | NPM_MOUSE   | Nucleophosmin (NPM) (Nucleolar phosphoprotein B23) (Nucleolar protein NO38) (Numatrin)                                                                                                                     |
| P15532 | NDKA_MOUSE  | Nucleoside diphosphate kinase A (NDK A) (NDP kinase A) (EC 2.7.4.6) (Metastasis inhibition factor NM23) (NDPK-A) (Tumor metastatic process-associated protein) (nm23-M1)                                   |
| Q01768 | NDKB_MOUSE  | Nucleoside diphosphate kinase B (NDK B) (NDP kinase B) (EC 2.7.4.6) (Histidine protein kinase NDKB) (EC 2.7.13.3) (P18) (nm23-M2)                                                                          |

|        |             |                                                                                                                                                                                                                                                                                                                                                          |
|--------|-------------|----------------------------------------------------------------------------------------------------------------------------------------------------------------------------------------------------------------------------------------------------------------------------------------------------------------------------------------------------------|
| Q78ZA7 | NP1L4_MOUSE | Nucleosome assembly protein 1-like 4                                                                                                                                                                                                                                                                                                                     |
| Q9CZ30 | OLA1_MOUSE  | Obg-like ATPase 1 (GTP-binding protein 9)                                                                                                                                                                                                                                                                                                                |
| Q3V1G4 | OLM2B_MOUSE | Olfactomedin-like protein 2B (Photomedin-2)                                                                                                                                                                                                                                                                                                              |
| Q8BK62 | OLFL3_MOUSE | Olfactomedin-like protein 3                                                                                                                                                                                                                                                                                                                              |
| Q62422 | OSTF1_MOUSE | Osteoclast-stimulating factor 1 (SH3 domain protein 3)                                                                                                                                                                                                                                                                                                   |
| O35103 | OMD_MOUSE   | Osteomodulin (Keratan sulfate proteoglycan osteomodulin) (KSPG osteomodulin) (Osteoadherin) (OSAD)                                                                                                                                                                                                                                                       |
| Q3B7Z2 | OSBP1_MOUSE | Oxysterol-binding protein 1                                                                                                                                                                                                                                                                                                                              |
| Q9Z0K8 | VNN1_MOUSE  | Pantetheinase (EC 3.5.1.92) (Pantetheine hydrolase) (Vascular non-inflammatory molecule 1) (Vanin-1)                                                                                                                                                                                                                                                     |
| Q8R4K8 | PAPP1_MOUSE | Pappalysin-1 (EC 3.4.24.79) (Insulin-like growth factor-dependent IGF-binding protein 4 protease) (IGF-dependent IGFBP-4 protease) (IGFBP-4ase) (Pregnancy-associated plasma protein A) (PAPP-A)                                                                                                                                                         |
| O70400 | PDLI1_MOUSE | PDZ and LIM domain protein 1 (C-terminal LIM domain protein 1) (Elfin) (LIM domain protein CLP-36)                                                                                                                                                                                                                                                       |
| P48759 | PTX3_MOUSE  | Pentraxin-related protein PTX3 (Pentaxin-related protein PTX3) (Tumor necrosis factor-inducible gene 14 protein) (TSG-14)                                                                                                                                                                                                                                |
| P17742 | PPIA_MOUSE  | Peptidyl-prolyl cis-trans isomerase A (PPIase A) (EC 5.2.1.8) (Cyclophilin A) (Cyclosporin A-binding protein) (Rotamase A) (SP18) [Cleaved into: Peptidyl-prolyl cis-trans isomerase A, N-terminally processed]                                                                                                                                          |
| P24369 | PPIB_MOUSE  | Peptidyl-prolyl cis-trans isomerase B (PPIase B) (EC 5.2.1.8) (CYP-S1) (Cyclophilin B) (Rotamase B) (S-cyclophilin) (SCYLP)                                                                                                                                                                                                                              |
| P30412 | PPIC_MOUSE  | Peptidyl-prolyl cis-trans isomerase C (PPIase C) (EC 5.2.1.8) (Cyclophilin C) (Rotamase C)                                                                                                                                                                                                                                                               |
| Q9QZH3 | PPIE_MOUSE  | Peptidyl-prolyl cis-trans isomerase E (PPIase E) (EC 5.2.1.8) (Cyclophilin E) (Cyclophilin-33) (Rotamase E)                                                                                                                                                                                                                                              |
| P30416 | FKBP4_MOUSE | Peptidyl-prolyl cis-trans isomerase FKBP4 (PPIase FKBP4) (EC 5.2.1.8) (52 kDa FK506-binding protein) (52 kDa FKBP) (FKBP-52) (59 kDa immunophilin) (p59) (FK506-binding protein 4) (FKBP-4) (FKBP59) (HSP-binding immunophilin) (HBI) (Immunophilin FKBP52) (Rotamase) [Cleaved into: Peptidyl-prolyl cis-trans isomerase FKBP4, N-terminally processed] |
| Q62009 | POSTN_MOUSE | Periostin (PN) (Osteoblast-specific factor 2) (OSF-2)                                                                                                                                                                                                                                                                                                    |

|        |             |                                                                                                                                                                                                                                                                                                                                                                          |
|--------|-------------|--------------------------------------------------------------------------------------------------------------------------------------------------------------------------------------------------------------------------------------------------------------------------------------------------------------------------------------------------------------------------|
| Q3UQ28 | PXDN_MOUSE  | Peroxidasin homolog (EC 1.11.1.7)                                                                                                                                                                                                                                                                                                                                        |
| P35700 | PRDX1_MOUSE | Peroxiredoxin-1 (EC 1.11.1.24) (Macrophage 23 kDa stress protein) (Osteoblast-specific factor 3) (OSF-3) (Thioredoxin peroxidase 2) (Thioredoxin-dependent peroxide reductase 2) (Thioredoxin-dependent peroxiredoxin 1)                                                                                                                                                 |
| O08807 | PRDX4_MOUSE | Peroxiredoxin-4 (EC 1.11.1.24) (Antioxidant enzyme AOE372) (Peroxiredoxin IV) (Prx-IV) (Thioredoxin peroxidase A0372) (Thioredoxin-dependent peroxide reductase A0372) (Thioredoxin-dependent peroxiredoxin 4)                                                                                                                                                           |
| O08709 | PRDX6_MOUSE | Peroxiredoxin-6 (EC 1.11.1.27) (1-Cys peroxiredoxin) (1-Cys PRX) (Acidic calcium-independent phospholipase A2) (aiPLA2) (EC 3.1.1.4) (Antioxidant protein 2) (Glutathione-dependent peroxiredoxin) (Lysophosphatidylcholine acyltransferase 5) (LPC acyltransferase 5) (LPCAT-5) (Lyso-PC acyltransferase 5) (EC 2.3.1.23) (Non-selenium glutathione peroxidase) (NSGPx) |
| Q9DCG6 | PBLD1_MOUSE | Phenazine biosynthesis-like domain-containing protein 1 (EC 5.1.-.-)                                                                                                                                                                                                                                                                                                     |
| P16331 | PH4H_MOUSE  | Phenylalanine-4-hydroxylase (PAH) (EC 1.14.16.1) (Phe-4-monooxygenase)                                                                                                                                                                                                                                                                                                   |
| P16301 | LCAT_MOUSE  | Phosphatidylcholine-sterol acyltransferase (EC 2.3.1.43) (1-alkyl-2-acetylglycerophosphocholine esterase) (EC 3.1.1.47) (Lecithin-cholesterol acyltransferase) (Phospholipid-cholesterol acyltransferase) (Platelet-activating factor acetylhydrolase) (PAF acetylhydrolase)                                                                                             |
| P70296 | PEBP1_MOUSE | Phosphatidylethanolamine-binding protein 1 (PEBP-1) (HCNPPp) [Cleaved into: Hippocampal cholinergic neurostimulating peptide (HCNP)]                                                                                                                                                                                                                                     |
| Q9D0F9 | PGM1_MOUSE  | Phosphoglucomutase-1 (PGM 1) (EC 5.4.2.2) (Glucose phosphomutase 1) (Phosphoglucomutase-2)                                                                                                                                                                                                                                                                               |
| Q7TSV4 | PGM2_MOUSE  | Phosphoglucomutase-2 (PGM 2) (EC 5.4.2.2) (Glucose phosphomutase 2)                                                                                                                                                                                                                                                                                                      |
| P09411 | PGK1_MOUSE  | (Phosphodeoxyribomutase) (Phosphoglucomutase-1) (Phosphopentomutase) (EC 5.4.2.7)<br>Phosphoglycerate kinase 1 (EC 2.7.2.3)                                                                                                                                                                                                                                              |
| P09041 | PGK2_MOUSE  | Phosphoglycerate kinase 2 (EC 2.7.2.3) (Phosphoglycerate kinase, testis specific)                                                                                                                                                                                                                                                                                        |

|                            |                                        |                                                                                                                                                                                                                                                                          |
|----------------------------|----------------------------------------|--------------------------------------------------------------------------------------------------------------------------------------------------------------------------------------------------------------------------------------------------------------------------|
| Q9DBJ1<br>P55065           | PGAM1_MOUSE<br>PLTP_MOUSE              | Phosphoglycerate mutase 1 (EC 5.4.2.11) (EC 5.4.2.4) (BPG-dependent PGAM 1) (Phosphoglycerate mutase isozyme B) (PGAM-B)<br>Phospholipid transfer protein (Lipid transfer protein II)                                                                                    |
| Q5SUR0                     | PUR4_MOUSE                             | Phosphoribosylformylglycinamide synthase (FGAM synthase) (FGAMS) (EC 6.3.5.3) (Formylglycinamide ribonucleotide amidotransferase) (FGAR amidotransferase) (FGAR-AT) (Formylglycinamide ribotide amidotransferase)                                                        |
| Q99K85                     | SERC_MOUSE                             | Phosphoserine aminotransferase (PSAT) (EC 2.6.1.52) (Endometrial progesterone-induced protein) (EPIP) (Phosphohydroxythreonine aminotransferase)                                                                                                                         |
| P97298<br>Q8K262           | PEDF_MOUSE<br>PLAC9_MOUSE              | Pigment epithelium-derived factor (PEDF) (Caspin) (Serpine F1) (Stromal cell-derived factor 3) (SDF-3)<br>Placenta-specific protein 9                                                                                                                                    |
| P20918                     | PLMN_MOUSE                             | Plasminogen (EC 3.4.21.7) [Cleaved into: Plasmin heavy chain A; Activation peptide; Angiostatin; Plasmin heavy chain A, short form; Plasmin light chain B]<br>Plasminogen activator inhibitor 1 (PAI) (PAI-1) (Endothelial plasminogen activator inhibitor) (Serpine E1) |
| P22777<br>Q3V0K9<br>Q99K51 | PAI1_MOUSE<br>PLSI_MOUSE<br>PLST_MOUSE | Plastin-1<br>Plastin-3 (T-plastin)                                                                                                                                                                                                                                       |
| Q61205                     | PA1B3_MOUSE                            | Platelet-activating factor acetylhydrolase IB subunit alpha1 (EC 3.1.1.47) (PAF acetylhydrolase 29 kDa subunit) (PAF-AH 29 kDa subunit) (PAF-AH subunit gamma) (PAFAH subunit gamma)                                                                                     |
| P63005<br>Q9JHK5           | LIS1_MOUSE<br>PLEK_MOUSE               | Platelet-activating factor acetylhydrolase IB subunit beta (Lissencephaly-1 protein) (LIS-1) (PAF acetylhydrolase 45 kDa subunit) (PAF-AH 45 kDa subunit) (PAF-AH alpha) (PAFAH alpha)<br>Pleckstrin                                                                     |
| Q9DC11<br>B2RXS4           | PXDC2_MOUSE<br>PLXB2_MOUSE             | Plexin domain-containing protein 2 (Tumor endothelial marker 7-related protein)<br>Plexin-B2                                                                                                                                                                             |
| P60335                     | PCBP1_MOUSE                            | Poly(rC)-binding protein 1 (Alpha-CP1) (Heterogeneous nuclear ribonucleoprotein E1) (hnRNP E1)                                                                                                                                                                           |

|        |             |                                                                                                                                                                                                                                                                                                                       |
|--------|-------------|-----------------------------------------------------------------------------------------------------------------------------------------------------------------------------------------------------------------------------------------------------------------------------------------------------------------------|
| P29341 | PABP1_MOUSE | Polyadenylate-binding protein 1 (PABP-1) (Poly(A)-binding protein 1)                                                                                                                                                                                                                                                  |
|        |             | Polypeptide N-acetylgalactosaminyltransferase 2 (EC 2.4.1.41) (Polypeptide GalNAc transferase 2) (GalNAc-T2) (pp-GaNTase 2) (Protein-UDP acetylgalactosaminyltransferase 2) (UDP-GalNAc:polypeptide N-acetylgalactosaminyltransferase 2) [Cleaved into: Polypeptide N-acetylgalactosaminyltransferase 2 soluble form] |
| Q6PB93 | GALT2_MOUSE |                                                                                                                                                                                                                                                                                                                       |
| P0CG49 | UBB_MOUSE   | Polyubiquitin-B [Cleaved into: Ubiquitin]                                                                                                                                                                                                                                                                             |
| P0CG50 | UBC_MOUSE   | Polyubiquitin-C [Cleaved into: Ubiquitin; Ubiquitin-related 1; Ubiquitin-related 2]                                                                                                                                                                                                                                   |
| Q61838 | PZP_MOUSE   | Pregnancy zone protein (Alpha-2-macroglobulin) (Alpha-2-M) [Cleaved into: Alpha-2-macroglobulin 165 kDa subunit; Alpha-2-macroglobulin 35 kDa subunit]                                                                                                                                                                |
| P48678 | LMNA_MOUSE  | Prelamin-A/C [Cleaved into: Lamin-A/C]                                                                                                                                                                                                                                                                                |
| Q9Z100 | CPXM1_MOUSE | Probable carboxypeptidase X1 (EC 3.4.17.-) (Metalloprotease CPX-1)                                                                                                                                                                                                                                                    |
| Q9DBA8 | HUTI_MOUSE  | Probable imidazolonepropionase (EC 3.5.2.7) (Amidohydrolase domain-containing protein 1)                                                                                                                                                                                                                              |
| Q61398 | PCOC1_MOUSE | Procollagen C-endopeptidase enhancer 1 (P14) (Procollagen COOH-terminal proteinase enhancer 1) (PCPE-1) (Procollagen C-proteinase enhancer 1) (Type 1 procollagen C-proteinase enhancer protein) (Type I procollagen COOH-terminal proteinase enhancer)                                                               |
| Q9R0E2 | PLOD1_MOUSE | Procollagen-lysine,2-oxoglutarate 5-dioxygenase 1 (EC 1.14.11.4) (Lysyl hydroxylase 1) (LH1)                                                                                                                                                                                                                          |
| P62962 | PROF1_MOUSE | Profilin-1 (Profilin I)                                                                                                                                                                                                                                                                                               |
| Q9WU78 | PDC6I_MOUSE | Programmed cell death 6-interacting protein (ALG-2-interacting protein 1) (ALG-2-interacting protein X) (E2F1-inducible protein) (Eig2)                                                                                                                                                                               |
| Q9CRB5 | PR7C1_MOUSE | Prolactin-7C1 (Placental prolactin-like protein O) (PLP-O) (PRL-like protein O)                                                                                                                                                                                                                                       |
| Q9JK53 | PRELP_MOUSE | Prolargin (Proline-arginine-rich end leucine-rich repeat protein)                                                                                                                                                                                                                                                     |
| P50580 | PA2G4_MOUSE | Proliferation-associated protein 2G4 (IRES-specific cellular trans-acting factor 45 kDa) (ITAF45) (Mpp1) (Proliferation-associated protein 1) (Protein p38-2G4)                                                                                                                                                       |

|        |             |                                                                                                                                                                                                                                                                                                                                                                                                                                                         |
|--------|-------------|---------------------------------------------------------------------------------------------------------------------------------------------------------------------------------------------------------------------------------------------------------------------------------------------------------------------------------------------------------------------------------------------------------------------------------------------------------|
| Q91ZX7 | LRP1_MOUSE  | Prolow-density lipoprotein receptor-related protein 1 (LRP-1) (Alpha-2-macroglobulin receptor (A2MR) (CD antigen CD91) [Cleaved into: Low-density lipoprotein receptor-related protein 1 85 kDa subunit (LRP-85); Low-density lipoprotein receptor-related protein 1 515 kDa subunit (LRP-515); Low-density lipoprotein receptor-related protein 1 intracellular domain (LRPICD)]                                                                       |
| Q60715 | P4HA1_MOUSE | Prolyl 4-hydroxylase subunit alpha-1 (4-PH alpha-1) (EC 1.14.11.2) (Procollagen-proline,2-oxoglutarate-4-dioxygenase subunit alpha-1)                                                                                                                                                                                                                                                                                                                   |
| Q9QUR6 | PPCE_MOUSE  | Prolyl endopeptidase (PE) (EC 3.4.21.26) (Post-proline cleaving enzyme)                                                                                                                                                                                                                                                                                                                                                                                 |
| P97321 | SEPR_MOUSE  | Prolyl endopeptidase FAP (EC 3.4.21.26) (Dipeptidyl peptidase FAP) (EC 3.4.14.5) (Fibroblast activation protein alpha) (FAPalpha) (Gelatin degradation protease FAP) (EC 3.4.21.-) (Integral membrane serine protease) (Post-proline cleaving enzyme) (Serine integral membrane protease) (SIMP) (Surface-expressed protease) (Seprase) [Cleaved into: Antiplasmin-cleaving enzyme FAP, soluble form (APCE) (EC 3.4.14.5) (EC 3.4.21.-) (EC 3.4.21.26)] |
| Q61207 | SAP_MOUSE   | Prosaposin (Sulfated glycoprotein 1) (SGP-1) [Cleaved into: Saposin-A; Saposin-B-Val; Saposin-B; Saposin-C; Saposin-D]                                                                                                                                                                                                                                                                                                                                  |
| O35074 | PTGIS_MOUSE | Prostacyclin synthase (EC 5.3.99.4) (Hydroperoxy icosatetraenoate dehydratase) (EC 4.2.1.152) (Prostaglandin I2 synthase)                                                                                                                                                                                                                                                                                                                               |
| Q9R0Q7 | TEBP_MOUSE  | Prostaglandin E synthase 3 (EC 5.3.99.3) (Cytosolic prostaglandin E2 synthase) (cPGES) (Hsp90 co-chaperone) (Progesterone receptor complex p23) (Sid 3177) (Telomerase-binding protein p23)                                                                                                                                                                                                                                                             |
| Q9WV91 | FPRP_MOUSE  | Prostaglandin F2 receptor negative regulator (CD9 partner 1) (CD9P-1) (Glu-Trp-Ile EWI motif-containing protein F) (EWI-F) (Prostaglandin F2-alpha receptor regulatory protein) (Prostaglandin F2-alpha receptor-associated protein) (CD antigen CD315)                                                                                                                                                                                                 |
| Q8VDQ1 | PTGR2_MOUSE | Prostaglandin reductase 2 (PRG-2) (EC 1.3.1.48) (15-oxoprostaglandin 13-reductase) (Zinc-binding alcohol dehydrogenase domain-containing protein 1)                                                                                                                                                                                                                                                                                                     |
| Q9DB60 | PXL2B_MOUSE | Prostamide/prostaglandin F synthase (Prostamide/PF synthase) (Prostamide/PGF synthase) (EC 1.11.1.20) (Peroxiredoxin-like 2B)                                                                                                                                                                                                                                                                                                                           |

|        |             |                                                                                                                                                                                                         |
|--------|-------------|---------------------------------------------------------------------------------------------------------------------------------------------------------------------------------------------------------|
| Q9R1P4 | PSA1_MOUSE  | Proteasome subunit alpha type-1 (Macropain subunit C2) (Multicatalytic endopeptidase complex subunit C2) (Proteasome component C2) (Proteasome nu chain)                                                |
| P49722 | PSA2_MOUSE  | Proteasome subunit alpha type-2 (Macropain subunit C3) (Multicatalytic endopeptidase complex subunit C3) (Proteasome component C3)                                                                      |
| O70435 | PSA3_MOUSE  | Proteasome subunit alpha type-3 (Macropain subunit C8) (Multicatalytic endopeptidase complex subunit C8) (Proteasome component C8) (Proteasome subunit K)                                               |
| Q9R1P0 | PSA4_MOUSE  | Proteasome subunit alpha type-4 (Macropain subunit C9) (Multicatalytic endopeptidase complex subunit C9) (Proteasome component C9) (Proteasome subunit L)                                               |
| Q9Z2U1 | PSA5_MOUSE  | Proteasome subunit alpha type-5 (Macropain zeta chain) (Multicatalytic endopeptidase complex zeta chain) (Proteasome zeta chain)                                                                        |
| Q9QUM9 | PSA6_MOUSE  | Proteasome subunit alpha type-6 (Macropain iota chain) (Multicatalytic endopeptidase complex iota chain) (Proteasome iota chain)                                                                        |
| Q9Z2U0 | PSA7_MOUSE  | Proteasome subunit alpha type-7 (Proteasome subunit RC6-1)                                                                                                                                              |
| O09061 | PSB1_MOUSE  | Proteasome subunit beta type-1 (Macropain subunit C5) (Multicatalytic endopeptidase complex subunit C5) (Proteasome component C5) (Proteasome gamma chain)                                              |
| Q9R1P1 | PSB3_MOUSE  | Proteasome subunit beta type-3 (Proteasome chain 13) (Proteasome component C10-II) (Proteasome theta chain)                                                                                             |
| P99026 | PSB4_MOUSE  | Proteasome subunit beta type-4 (Low molecular mass protein 3) (Macropain beta chain) (Multicatalytic endopeptidase complex beta chain) (Proteasome beta chain) (Proteasome chain 3)                     |
| Q60692 | PSB6_MOUSE  | Proteasome subunit beta type-6 (EC 3.4.25.1) (Low molecular mass protein 19) (Macropain delta chain) (Multicatalytic endopeptidase complex delta chain) (Proteasome delta chain) (Proteasome subunit Y) |
| Q8VCR7 | ABHEB_MOUSE | Protein ABHD14B (EC 3.-.-) (Alpha/beta hydrolase domain-containing protein 14B) (Abhydrolase domain-containing protein 14B) (CCG1-interacting factor B)                                                 |



|        |             |                                                                                                                                                                                                                                                                                                 |
|--------|-------------|-------------------------------------------------------------------------------------------------------------------------------------------------------------------------------------------------------------------------------------------------------------------------------------------------|
| Q07456 | AMBP_MOUSE  | Protein AMBP [Cleaved into: Alpha-1-microglobulin; Inter-alpha-trypsin inhibitor light chain (ITI-LC) (Bikunin) (HI-30); Trypstatin]                                                                                                                                                            |
| Q8BR07 | BICD1_MOUSE | Protein bicaudal D homolog 1 (Bic-D 1)                                                                                                                                                                                                                                                          |
| O08808 | DIAP1_MOUSE | Protein diaphanous homolog 1 (Diaphanous-related formin-1) (DRF1) (p140mDIA) (mDIA1)<br>Protein disulfide-isomerase (PDI) (EC 5.3.4.1) (Cellular thyroid hormone-binding protein) (Endoplasmic reticulum resident protein 59) (ER protein 59) (ERp59) (Prolyl 4-hydroxylase subunit beta) (p55) |
| P09103 | PDIA1_MOUSE |                                                                                                                                                                                                                                                                                                 |
| P27773 | PDIA3_MOUSE | Protein disulfide-isomerase A3 (EC 5.3.4.1) (58 kDa glucose-regulated protein) (58 kDa microsomal protein) (p58) (Disulfide isomerase ER-60) (Endoplasmic reticulum resident protein 57) (ER protein 57) (ERp57) (Endoplasmic reticulum resident protein 60) (ER protein 60) (ERp60)            |
| Q922R8 | PDIA6_MOUSE | Protein disulfide-isomerase A6 (EC 5.3.4.1) (Thioredoxin domain-containing protein 7)                                                                                                                                                                                                           |
| Q91VH6 | MEMO1_MOUSE | Protein MEMO1 (Mediator of ErbB2-driven cell motility 1) (Memo-1)                                                                                                                                                                                                                               |
| Q3UM45 | PP1R7_MOUSE | Protein phosphatase 1 regulatory subunit 7 (Protein phosphatase 1 regulatory subunit 22)                                                                                                                                                                                                        |
| P07091 | S10A4_MOUSE | Protein S100-A4 (Metastasin) (Metastatic cell protein) (PEL98) (Placental calcium-binding protein) (Protein 18A2) (Protein Mts1) (S100 calcium-binding protein A4)                                                                                                                              |
| Q3UPL0 | SC31A_MOUSE | Protein transport protein Sec31A (SEC31-like protein 1) (SEC31-related protein A)                                                                                                                                                                                                               |
| Q8R121 | ZPI_MOUSE   | Protein Z-dependent protease inhibitor (PZ-dependent protease inhibitor) (PZI) (Serpin A10)                                                                                                                                                                                                     |
| P23506 | PIMT_MOUSE  | Protein-L-isoaspartate(D-aspartate) O-methyltransferase (PIMT) (EC 2.1.1.77) (L-isoaspartyl protein carboxyl methyltransferase) (Protein L-isoaspartyl/D-aspartyl methyltransferase) (Protein-beta-aspartate methyltransferase)                                                                 |
| P28301 | LYOX_MOUSE  | Protein-lysine 6-oxidase (EC 1.4.3.13) (Lysyl oxidase) (Ras excision protein) [Cleaved into: Protein-lysine 6-oxidase, long form; Protein-lysine 6-oxidase, short form]                                                                                                                         |

|        |             |                                                                                                                                                                            |
|--------|-------------|----------------------------------------------------------------------------------------------------------------------------------------------------------------------------|
| Q9JM99 | PRG4_MOUSE  | Proteoglycan 4 (Lubricin) (Megakaryocyte-stimulating factor) (Superficial zone proteoglycan) [Cleaved into: Proteoglycan 4 C-terminal part]                                |
| P19221 | THRB_MOUSE  | Prothrombin (EC 3.4.21.5) (Coagulation factor II) [Cleaved into: Activation peptide fragment 1; Activation peptide fragment 2; Thrombin light chain; Thrombin heavy chain] |
| Q2PZL6 | FAT4_MOUSE  | Protocadherin Fat 4 (FAT tumor suppressor homolog 4) (Fat-like cadherin protein FAT-J)                                                                                     |
| P23492 | PNPH_MOUSE  | Purine nucleoside phosphorylase (PNP) (EC 2.4.2.1) (Inosine phosphorylase) (Inosine-guanosine phosphorylase)                                                               |
| Q11011 | PSA_MOUSE   | Puromycin-sensitive aminopeptidase (PSA) (EC 3.4.11.14) (Cytosol alanyl aminopeptidase) (AAP-S)                                                                            |
| Q68FL4 | SAHH3_MOUSE | Putative adenosylhomocysteinase 3 (AdoHcyase 3) (EC 3.3.1.1) (Long-IRBIT) (S-adenosyl-L-homocysteine hydrolase 3) (S-adenosylhomocysteine hydrolase-like protein 2)        |
| Q6P8M1 | TATD1_MOUSE | Putative deoxyribonuclease TATDN1 (EC 3.1.21.-)                                                                                                                            |
| P53657 | KPYR_MOUSE  | Pyruvate kinase PKLR (EC 2.7.1.40) (L-PK) (Pyruvate kinase isozymes L/R)                                                                                                   |
| P52480 | KPYM_MOUSE  | Pyruvate kinase PKM (EC 2.7.1.40) (Pyruvate kinase muscle isozyme)                                                                                                         |
| P47199 | QOR_MOUSE   | Quinone oxidoreductase (EC 1.6.5.5) (NADPH:quinone reductase) (Zeta-crystallin)                                                                                            |
| P50396 | GDIA_MOUSE  | Rab GDP dissociation inhibitor alpha (Rab GDI alpha) (Guanosine diphosphate dissociation inhibitor 1) (GDI-1)                                                              |
| Q61598 | GDIB_MOUSE  | Rab GDP dissociation inhibitor beta (Rab GDI beta) (GDI-3) (Guanosine diphosphate dissociation inhibitor 2) (GDI-2)                                                        |
| Q9JKF1 | IQGA1_MOUSE | Ras GTPase-activating-like protein IQGAP1                                                                                                                                  |
| Q3UQ44 | IQGA2_MOUSE | Ras GTPase-activating-like protein IQGAP2                                                                                                                                  |
| Q01730 | RSU1_MOUSE  | Ras suppressor protein 1 (RSP-1) (Rsu-1)                                                                                                                                   |
| P63001 | RAC1_MOUSE  | Ras-related C3 botulinum toxin substrate 1 (EC 3.6.5.2) (p21-Rac1)                                                                                                         |
| P62492 | RB11A_MOUSE | Ras-related protein Rab-11A (Rab-11) (EC 3.6.5.2)                                                                                                                          |
| P46638 | RB11B_MOUSE | Ras-related protein Rab-11B (EC 3.6.5.2)                                                                                                                                   |
| P62821 | RAB1A_MOUSE | Ras-related protein Rab-1A (EC 3.6.5.2) (YPT1-related protein)                                                                                                             |
| Q9D1G1 | RAB1B_MOUSE | Ras-related protein Rab-1B (EC 3.6.5.2)                                                                                                                                    |
| P35282 | RAB21_MOUSE | Ras-related protein Rab-21 (Rab-12)                                                                                                                                        |

|        |             |                                                                                                                                                                                                                                                                                                                                                                    |
|--------|-------------|--------------------------------------------------------------------------------------------------------------------------------------------------------------------------------------------------------------------------------------------------------------------------------------------------------------------------------------------------------------------|
| P53994 | RAB2A_MOUSE | Ras-related protein Rab-2A                                                                                                                                                                                                                                                                                                                                         |
| P51150 | RAB7A_MOUSE | Ras-related protein Rab-7a (EC 3.6.5.2)                                                                                                                                                                                                                                                                                                                            |
| Q99JI6 | RAP1B_MOUSE | Ras-related protein Rap-1b (EC 3.6.5.2) (GTP-binding protein smg p21B)                                                                                                                                                                                                                                                                                             |
| P68040 | RACK1_MOUSE | Receptor of activated protein C kinase 1 (12-3) (Guanine nucleotide-binding protein subunit beta-2-like 1) (Receptor for activated C kinase) (Receptor of activated protein kinase C 1) (p205) [Cleaved into: Receptor of activated protein C kinase 1, N-terminally processed (Guanine nucleotide-binding protein subunit beta-2-like 1, N-terminally processed)] |
| A2A8L5 | PTPRF_MOUSE | Receptor-type tyrosine-protein phosphatase F (EC 3.1.3.48) (Leukocyte common antigen related) (LAR)                                                                                                                                                                                                                                                                |
| Q05909 | PTPRG_MOUSE | Receptor-type tyrosine-protein phosphatase gamma (Protein-tyrosine phosphatase gamma) (R-PTP-gamma) (EC 3.1.3.48)                                                                                                                                                                                                                                                  |
| B0V2N1 | PTPRS_MOUSE | Receptor-type tyrosine-protein phosphatase S (R-PTP-S) (EC 3.1.3.48) (PTPNU-3) (Receptor-type tyrosine-protein phosphatase sigma) (R-PTP-sigma)                                                                                                                                                                                                                    |
| B9EKR1 | PTPRZ_MOUSE | Receptor-type tyrosine-protein phosphatase zeta (R-PTP-zeta) (EC 3.1.3.48)                                                                                                                                                                                                                                                                                         |
| Q60841 | RELN_MOUSE  | Reelin (EC 3.4.21.-) (Reeler protein)                                                                                                                                                                                                                                                                                                                              |
| Q64374 | RGN_MOUSE   | Regucalcin (RC) (Gluconolactonase) (GNL) (EC 3.1.1.17) (Senescence marker protein 30) (SMP-30)                                                                                                                                                                                                                                                                     |
| Q99P72 | RTN4_MOUSE  | Reticulon-4 (Neurite outgrowth inhibitor) (Nogo protein)                                                                                                                                                                                                                                                                                                           |
| P24549 | AL1A1_MOUSE | Retinal dehydrogenase 1 (RALDH 1) (RaLDH1) (EC 1.2.1.-) (EC 1.2.1.36) (ALDH-E1) (ALHDII) (Aldehyde dehydrogenase family 1 member A1) (Aldehyde dehydrogenase, cytosolic)                                                                                                                                                                                           |
| Q00915 | RET1_MOUSE  | Retinol-binding protein 1 (Cellular retinol-binding protein) (CRBP) (Cellular retinol-binding protein I) (CRBP-I) (mCRBPI)                                                                                                                                                                                                                                         |
| Q99PT1 | GDIR1_MOUSE | Rho GDP-dissociation inhibitor 1 (Rho GDI 1) (GDI-1) (Rho-GDI alpha)                                                                                                                                                                                                                                                                                               |
| Q61599 | GDIR2_MOUSE | Rho GDP-dissociation inhibitor 2 (Rho GDI 2) (D4) (Rho-GDI beta)                                                                                                                                                                                                                                                                                                   |
| Q62159 | RHOC_MOUSE  | Rho-related GTP-binding protein RhoC (Silica-induced gene 61 protein) (SIG-61)                                                                                                                                                                                                                                                                                     |

|        |             |                                                                                                                                                                                                             |
|--------|-------------|-------------------------------------------------------------------------------------------------------------------------------------------------------------------------------------------------------------|
| P07742 | RIR1_MOUSE  | Ribonucleoside-diphosphate reductase large subunit (EC 1.17.4.1) (Ribonucleoside-diphosphate reductase subunit M1) (Ribonucleotide reductase large subunit)                                                 |
| P70122 | SBDS_MOUSE  | Ribosome maturation protein SBDS (Protein 22A3) (Shwachman-Bodian-Diamond syndrome protein homolog)                                                                                                         |
| Q99MV7 | RNF17_MOUSE | RING finger protein 17 (Mad member-interacting protein 2) (Mmip-2)                                                                                                                                          |
| E9Q401 | RYR2_MOUSE  | Ryanodine receptor 2 (RYR-2) (RyR2) (Cardiac muscle ryanodine receptor) (Cardiac muscle ryanodine receptor-calcium release channel) (Type 2 ryanodine receptor)                                             |
| Q80SW1 | SAHH2_MOUSE | S-adenosylhomocysteine hydrolase-like protein 1 (IP3R-binding protein released with inositol 1,4,5-trisphosphate) (Putative adenosylhomocysteinase 2) (S-adenosyl-L-homocysteine hydrolase 2) (AdoHcyase 2) |
| Q91X83 | METK1_MOUSE | S-adenosylmethionine synthase isoform type-1 (AdoMet synthase 1) (EC 2.5.1.6) (Methionine adenosyltransferase 1) (MAT 1)                                                                                    |
| Q3THS6 | METK2_MOUSE | S-adenosylmethionine synthase isoform type-2 (AdoMet synthase 2) (EC 2.5.1.6) (Methionine adenosyltransferase 2) (MAT 2)                                                                                    |
| Q99J08 | S14L2_MOUSE | SEC14-like protein 2 (Alpha-tocopherol-associated protein) (TAP)                                                                                                                                            |
| Q8C4U3 | SFRP1_MOUSE | Secreted frizzled-related protein 1 (sFRP-1)                                                                                                                                                                |
| Q63836 | SBP2_MOUSE  | Selenium-binding protein 2 (56 kDa acetaminophen-binding protein) (AP56)                                                                                                                                    |
| Q4LFA9 | SEM3G_MOUSE | Semaphorin-3G                                                                                                                                                                                               |
| Q62179 | SEM4B_MOUSE | Semaphorin-4B (Semaphorin-C) (Sema C)                                                                                                                                                                       |
| Q76KF0 | SEM6D_MOUSE | Semaphorin-6D                                                                                                                                                                                               |
| Q8C1B7 | SEP11_MOUSE | Septin-11                                                                                                                                                                                                   |
| P42208 | SEPT2_MOUSE | Septin-2 (Neural precursor cell expressed developmentally down-regulated protein 5) (NEDD-5)                                                                                                                |
| Q9R1T4 | SEPT6_MOUSE | Septin-6                                                                                                                                                                                                    |
| O55131 | SEPT7_MOUSE | Septin-7 (CDC10 protein homolog)                                                                                                                                                                            |
| Q9D6X6 | PRS23_MOUSE | Serine protease 23 (EC 3.4.21.-)                                                                                                                                                                            |
| Q9R118 | HTRA1_MOUSE | Serine protease HTRA1 (EC 3.4.21.-) (High-temperature requirement A serine peptidase 1) (Serine protease 11)                                                                                                |
| Q8CIN4 | PAK2_MOUSE  | Serine/threonine-protein kinase PAK 2 (EC 2.7.11.1) (Gamma-PAK) (p21-activated kinase 2) (PAK-2) [Cleaved into: PAK-2p27; PAK-2p34]                                                                         |

|        |             |                                                                                                                                                         |
|--------|-------------|---------------------------------------------------------------------------------------------------------------------------------------------------------|
| Q76MZ3 | 2AAA_MOUSE  | Serine/threonine-protein phosphatase 2A 65 kDa regulatory subunit A alpha isoform (PP2A subunit A isoform PR65-alpha) (PP2A subunit A isoform R1-alpha) |
| P63330 | PP2AA_MOUSE | Serine/threonine-protein phosphatase 2A catalytic subunit alpha isoform (PP2A-alpha) (EC 3.1.3.16)                                                      |
| P62137 | PP1A_MOUSE  | Serine/threonine-protein phosphatase PP1-alpha catalytic subunit (PP-1A) (EC 3.1.3.16)                                                                  |
| P62141 | PP1B_MOUSE  | Serine/threonine-protein phosphatase PP1-beta catalytic subunit (PP-1B) (EC 3.1.3.16) (EC 3.1.3.53)                                                     |
| P63087 | PP1G_MOUSE  | Serine/threonine-protein phosphatase PP1-gamma catalytic subunit (PP-1G) (EC 3.1.3.16) (Protein phosphatase 1C catalytic subunit)                       |
| Q9Z1Z2 | STRAP_MOUSE | Serine-threonine kinase receptor-associated protein (UNR-interacting protein)                                                                           |
| P26638 | SYSC_MOUSE  | Serine--tRNA ligase, cytoplasmic (EC 6.1.1.11) (Seryl-tRNA synthetase) (SerRS) (Seryl-tRNA(Ser/Sec) synthetase)                                         |
| Q92111 | TRFE_MOUSE  | Serotransferrin (Transferrin) (Beta-1 metal-binding globulin) (Siderophilin)                                                                            |
| P19324 | SERPH_MOUSE | Serpin H1 (47 kDa heat shock protein) (Collagen-binding protein) (Colligin) (Serine protease inhibitor J6)                                              |
| Q99MR6 | SRRT_MOUSE  | Serrate RNA effector molecule homolog (Arsenite-resistance protein 2)                                                                                   |
| Q9R0P3 | ESTD_MOUSE  | S-formylglutathione hydrolase (FGH) (EC 3.1.2.12) (Esterase 10) (Esterase D) (Sid 478)                                                                  |
| Q99J77 | SIAS_MOUSE  | Sialic acid synthase (N-acetylneuraminate-9-phosphate synthase) (EC 2.5.1.57) (N-acetylneuraminic acid phosphate synthase)                              |
| P42230 | STA5A_MOUSE | Signal transducer and activator of transcription 5A (Mammary gland factor)                                                                              |
| P42232 | STA5B_MOUSE | Signal transducer and activator of transcription 5B                                                                                                     |
| Q9R1B9 | SLIT2_MOUSE | Slit homolog 2 protein (Slit-2) [Cleaved into: Slit homolog 2 protein N-product; Slit homolog 2 protein C-product]                                      |
| Q9WVB4 | SLIT3_MOUSE | Slit homolog 3 protein (Slit-3) (Slit3)                                                                                                                 |
| Q9CQ65 | MTAP_MOUSE  | S-methyl-5'-thioadenosine phosphorylase (EC 2.4.2.28) (5'-methylthioadenosine phosphorylase) (MTA phosphorylase) (MTAP) (MTAPase)                       |

|        |             |                                                                                                                                                                                                                                                          |
|--------|-------------|----------------------------------------------------------------------------------------------------------------------------------------------------------------------------------------------------------------------------------------------------------|
| Q8VDN2 | AT1A1_MOUSE | Sodium/potassium-transporting ATPase subunit alpha-1 (Na <sup>+</sup> )/K <sup>+</sup> ATPase alpha-1 subunit) (EC 7.2.2.13) (Sodium pump subunit alpha-1)                                                                                               |
| Q6PIE5 | AT1A2_MOUSE | Sodium/potassium-transporting ATPase subunit alpha-2 (Na <sup>+</sup> )/K <sup>+</sup> ATPase alpha-2 subunit) (EC 7.2.2.13) (Na <sup>+</sup> )/K <sup>+</sup> ATPase alpha(+) subunit) (Sodium pump subunit alpha-2)                                    |
| Q6PIC6 | AT1A3_MOUSE | Sodium/potassium-transporting ATPase subunit alpha-3 (Na <sup>+</sup> )/K <sup>+</sup> ATPase alpha-3 subunit) (EC 7.2.2.13) (Na <sup>+</sup> )/K <sup>+</sup> ATPase alpha(III) subunit) (Sodium pump subunit alpha-3)                                  |
| Q8BV57 | SRCRL_MOUSE | Soluble scavenger receptor cysteine-rich domain-containing protein SSC5D (Scavenger receptor cysteine-rich domain-containing protein LOC284297 homolog)                                                                                                  |
| Q64442 | DHSO_MOUSE  | Sorbitol dehydrogenase (SDH) (SORD) (EC 1.1.1.-) (L-iditol 2-dehydrogenase) (EC 1.1.1.14) (Polyol dehydrogenase) (Xylitol dehydrogenase) (XDH) (EC 1.1.1.9)                                                                                              |
| O88307 | SORL_MOUSE  | Sortilin-related receptor (Gp250) (Low-density lipoprotein receptor relative with 11 ligand-binding repeats) (LDLR relative with 11 ligand-binding repeats) (LR11) (SorLA-1) (Sorting protein-related receptor containing LDLR class A repeats) (mSorLA) |
| Q9CWK8 | SNX2_MOUSE  | Sorting nexin-2                                                                                                                                                                                                                                          |
| Q9D8U8 | SNX5_MOUSE  | Sorting nexin-5                                                                                                                                                                                                                                          |
| Q6P8X1 | SNX6_MOUSE  | Sorting nexin-6 [Cleaved into: Sorting nexin-6, N-terminally processed]                                                                                                                                                                                  |
| P07214 | SPRC_MOUSE  | SPARC (Basement-membrane protein 40) (BM-40) (Osteonectin) (ON) (Secreted protein acidic and rich in cysteine)                                                                                                                                           |
| P70663 | SPRL1_MOUSE | SPARC-like protein 1 (Extracellular matrix protein 2) (Matrix glycoprotein Sc1)                                                                                                                                                                          |
| Q9Z1N5 | DX39B_MOUSE | Spliceosome RNA helicase Ddx39b (EC 3.6.4.13) (56 kDa U2AF65-associated protein) (DEAD box protein UAP56) (HLA-B-associated transcript 1 protein)                                                                                                        |
| Q8BMS2 | SPON2_MOUSE | Spondin-2 (Mindin)                                                                                                                                                                                                                                       |
| Q78PY7 | SND1_MOUSE  | Staphylococcal nuclease domain-containing protein 1 (EC 3.1.31.1) (100 kDa coactivator) (p100 co-activator)                                                                                                                                              |

|        |             |                                                                                                                                                                                                                                           |
|--------|-------------|-------------------------------------------------------------------------------------------------------------------------------------------------------------------------------------------------------------------------------------------|
| P40224 | SDF1_MOUSE  | Stromal cell-derived factor 1 (SDF-1) (12-O-tetradecanoylphorbol 13-acetate repressed protein 1) (TPAR1) (C-X-C motif chemokine 12) (Pre-B cell growth-stimulating factor) (PBSF) (Thymic lymphoma cell-stimulating factor) (TLSF)        |
| Q8BND5 | QSOX1_MOUSE | Sulfhydryl oxidase 1 (mSOx) (EC 1.8.3.2) (Quiescin Q6) (Skin sulfhydryl oxidase)                                                                                                                                                          |
| P63280 | UBC9_MOUSE  | SUMO-conjugating enzyme UBC9 (EC 2.3.2.-) (RING-type E3 SUMO transferase UBC9) (SUMO-protein ligase) (Ubiquitin carrier protein 9) (mUBC9) (Ubiquitin carrier protein I) (Ubiquitin-conjugating enzyme E2 I) (Ubiquitin-protein ligase I) |
| Q70E20 | SNED1_MOUSE | Sushi, nidogen and EGF-like domain-containing protein 1 (Secreted protein SST-3) (Stromal nidogen extracellular matrix protein)                                                                                                           |
| A2AVA0 | SVEP1_MOUSE | Sushi, von Willebrand factor type A, EGF and pentraxin domain-containing protein 1 (Polydom)                                                                                                                                              |
| Q62465 | VAT1_MOUSE  | Synaptic vesicle membrane protein VAT-1 homolog (EC 1.-.-.-)                                                                                                                                                                              |
| O35988 | SDC4_MOUSE  | Syndecan-4 (SYND4) (Ryudocan core protein)                                                                                                                                                                                                |
| Q64324 | STXB2_MOUSE | Syntaxin-binding protein 2 (MUSEC1) (Protein unc-18 homolog 2) (Munc18-2) (Unc18-2) (Protein unc-18 homolog B) (Unc-18B)                                                                                                                  |
| O08992 | SDCB1_MOUSE | Syntenin-1 (Scaffold protein Pbp1) (Syndecan-binding protein 1)                                                                                                                                                                           |
| P26039 | TLN1_MOUSE  | Talin-1                                                                                                                                                                                                                                   |
| P11983 | TCPA_MOUSE  | T-complex protein 1 subunit alpha (TCP-1-alpha) (CCT-alpha) (Tailless complex polypeptide 1A) (TCP-1-A) (Tailless complex polypeptide 1B) (TCP-1-B)                                                                                       |
| P80314 | TCPB_MOUSE  | T-complex protein 1 subunit beta (TCP-1-beta) (CCT-beta)                                                                                                                                                                                  |
| P80315 | TCPD_MOUSE  | T-complex protein 1 subunit delta (TCP-1-delta) (A45) (CCT-delta)                                                                                                                                                                         |
| P80316 | TCPE_MOUSE  | T-complex protein 1 subunit epsilon (TCP-1-epsilon) (CCT-epsilon)                                                                                                                                                                         |
| P80313 | TCPH_MOUSE  | T-complex protein 1 subunit eta (TCP-1-eta) (CCT-eta)                                                                                                                                                                                     |
| P80318 | TCPG_MOUSE  | T-complex protein 1 subunit gamma (TCP-1-gamma) (CCT-gamma) (Matricin) (mTRiC-P5)                                                                                                                                                         |
| P42932 | TCPQ_MOUSE  | T-complex protein 1 subunit theta (TCP-1-theta) (CCT-theta)                                                                                                                                                                               |
| P80317 | TCPZ_MOUSE  | T-complex protein 1 subunit zeta (TCP-1-zeta) (CCT-zeta-1)                                                                                                                                                                                |
| Q80YX1 | TENA_MOUSE  | Tenascin (TN) (Hexabrachion) (Tenascin-C) (TN-C)                                                                                                                                                                                          |
| Q9DCK3 | TSN4_MOUSE  | Tetraspanin-4 (Tspan-4) (Transmembrane 4 superfamily member 7)                                                                                                                                                                            |
| Q8CDN6 | TXNL1_MOUSE | Thioredoxin-like protein 1 (32 kDa thioredoxin-related protein)                                                                                                                                                                           |

|        |             |                                                                                                                                                                                    |
|--------|-------------|------------------------------------------------------------------------------------------------------------------------------------------------------------------------------------|
| Q9D0R2 | SYTC_MOUSE  | Threonine--tRNA ligase 1, cytoplasmic (EC 6.1.1.3) (Threonine--tRNA ligase, cytoplasmic) (Threonyl-tRNA synthetase) (ThrRS) (Threonyl-tRNA synthetase 1)                           |
| P35441 | TSP1_MOUSE  | Thrombospondin-1 (Glycoprotein G)                                                                                                                                                  |
| Q03350 | TSP2_MOUSE  | Thrombospondin-2                                                                                                                                                                   |
| Q05895 | TSP3_MOUSE  | Thrombospondin-3                                                                                                                                                                   |
| Q9Z1T2 | TSP4_MOUSE  | Thrombospondin-4                                                                                                                                                                   |
| P01831 | THY1_MOUSE  | Thy-1 membrane glycoprotein (Thy-1 antigen) (CD antigen CD90)                                                                                                                      |
| O08710 | THYG_MOUSE  | Thyroglobulin (Tg)                                                                                                                                                                 |
| P20352 | TF_MOUSE    | Tissue factor (TF) (Coagulation factor III) (CD antigen CD142)                                                                                                                     |
| Q93092 | TALDO_MOUSE | Transaldolase (EC 2.2.1.2)                                                                                                                                                         |
| O88393 | TGBR3_MOUSE | Transforming growth factor beta receptor type 3 (TGF-beta receptor type 3) (TGFR-3) (Betaglycan) (Transforming growth factor beta receptor III) (TGF-beta receptor type III)       |
| P82198 | BGH3_MOUSE  | Transforming growth factor-beta-induced protein ig-h3 (Beta ig-h3)                                                                                                                 |
| Q9QUI0 | RHOA_MOUSE  | Transforming protein RhoA (EC 3.6.5.2)                                                                                                                                             |
| Q9WVA4 | TAGL2_MOUSE | Transgelin-2 (SM22-beta)                                                                                                                                                           |
| Q91YD4 | TRPM2_MOUSE | Transient receptor potential cation channel subfamily M member 2 (Long transient receptor potential channel 2) (LTrpC-2) (LTrpC2) (Transient receptor potential channel 7) (TrpC7) |
| Q01853 | TERA_MOUSE  | Transitional endoplasmic reticulum ATPase (TER ATPase) (EC 3.6.4.6) (15S Mg(2+)-ATPase p97 subunit) (Valosin-containing protein) (VCP)                                             |
| P40142 | TKT_MOUSE   | Transketolase (TK) (EC 2.2.1.1) (P68)                                                                                                                                              |
| P63028 | TCTP_MOUSE  | Translationally-controlled tumor protein (TCTP) (21 kDa polypeptide) (p21) (p23)                                                                                                   |
| Q99P25 | TXIP1_MOUSE | Translin-associated factor X-interacting protein 1 (Trax-interacting protein 1)                                                                                                    |
| Q32NZ6 | TMC5_MOUSE  | Transmembrane channel-like protein 5                                                                                                                                               |
| P17751 | TPIS_MOUSE  | Triosephosphate isomerase (TIM) (EC 5.3.1.1) (Methylglyoxal synthase) (EC 4.2.3.3) (Triose-phosphate isomerase)                                                                    |
| P32921 | SYWC_MOUSE  | Tryptophan--tRNA ligase, cytoplasmic (EC 6.1.1.2) (Tryptophanyl-tRNA synthetase) (TrpRS) [Cleaved into: T1-TrpRS; T2-TrpRS]                                                        |
| Q8CBR6 | TSK_MOUSE   | Tsukushi (Leucine-rich repeat-containing protein 54)                                                                                                                               |



|        |             |                                                                                                                                                                                                     |
|--------|-------------|-----------------------------------------------------------------------------------------------------------------------------------------------------------------------------------------------------|
| P68368 | TBA4A_MOUSE | Tubulin alpha-4A chain (Alpha-tubulin 4) (Alpha-tubulin isotype M-alpha-4) (Tubulin alpha-4 chain)                                                                                                  |
| A2AQ07 | TBB1_MOUSE  | Tubulin beta-1 chain                                                                                                                                                                                |
| Q9D6F9 | TBB4A_MOUSE | Tubulin beta-4A chain (Tubulin beta-4 chain)                                                                                                                                                        |
| P68372 | TBB4B_MOUSE | Tubulin beta-4B chain (Tubulin beta-2C chain)                                                                                                                                                       |
| P99024 | TBB5_MOUSE  | Tubulin beta-5 chain                                                                                                                                                                                |
| Q922F4 | TBB6_MOUSE  | Tubulin beta-6 chain                                                                                                                                                                                |
| Q99JR5 | TINAL_MOUSE | Tubulointerstitial nephritis antigen-like (Adrenocortical zonation factor 1) (AZ-1) (Androgen-regulated gene 1 protein) (Tubulointerstitial nephritis antigen-related protein) (TARP)               |
| Q91YR1 | TWF1_MOUSE  | Twinfilin-1 (Protein A6)                                                                                                                                                                            |
| Q06806 | TIE1_MOUSE  | Tyrosine-protein kinase receptor Tie-1 (EC 2.7.10.1)                                                                                                                                                |
| P35235 | PTN11_MOUSE | Tyrosine-protein phosphatase non-receptor type 11 (EC 3.1.3.48) (Protein-tyrosine phosphatase SYP) (SH-PTP2) (SHP-2) (Shp2)                                                                         |
| P29351 | PTN6_MOUSE  | Tyrosine-protein phosphatase non-receptor type 6 (EC 3.1.3.48) (70Z-SHP) (Hematopoietic cell protein-tyrosine phosphatase) (PTPTY-42) (Protein-tyrosine phosphatase 1C) (PTP-1C) (SH-PTP1) (SHP-1)  |
| Q91WQ3 | SYYC_MOUSE  | Tyrosine--tRNA ligase, cytoplasmic (EC 6.1.1.1) (Tyrosyl-tRNA synthetase) (TyrRS) [Cleaved into: Tyrosine--tRNA ligase, cytoplasmic, N-terminally processed]                                        |
| P56399 | UBP5_MOUSE  | Ubiquitin carboxyl-terminal hydrolase 5 (EC 3.4.19.12) (Deubiquitinating enzyme 5) (Isopeptidase T) (Ubiquitin thioesterase 5) (Ubiquitin-specific-processing protease 5)                           |
| Q7TQI3 | OTUB1_MOUSE | Ubiquitin thioesterase OTUB1 (EC 3.4.19.12) (Deubiquitinating enzyme OTUB1) (OTU domain-containing ubiquitin aldehyde-binding protein 1) (Otubain-1) (Ubiquitin-specific-processing protease OTUB1) |
| P62983 | RS27A_MOUSE | Ubiquitin-40S ribosomal protein S27a (Ubiquitin carboxyl extension protein 80) [Cleaved into: Ubiquitin; 40S ribosomal protein S27a]                                                                |
| P62984 | RL40_MOUSE  | Ubiquitin-60S ribosomal protein L40 (Ubiquitin A-52 residue ribosomal protein fusion product 1) [Cleaved into: Ubiquitin; 60S ribosomal protein L40 (CEP52)]                                        |

|        |             |                                                                                                                                                                                                                                                                                                             |
|--------|-------------|-------------------------------------------------------------------------------------------------------------------------------------------------------------------------------------------------------------------------------------------------------------------------------------------------------------|
| P62838 | UB2D2_MOUSE | Ubiquitin-conjugating enzyme E2 D2 (EC 2.3.2.23) ((E3-independent) E2 ubiquitin-conjugating enzyme D2) (EC 2.3.2.24) (E2 ubiquitin-conjugating enzyme D2) (Ubiquitin carrier protein D2) (Ubiquitin-conjugating enzyme E2(17)KB 2) (Ubiquitin-conjugating enzyme E2-17 kDa 2) (Ubiquitin-protein ligase D2) |
| P61079 | UB2D3_MOUSE | Ubiquitin-conjugating enzyme E2 D3 (EC 2.3.2.23) ((E3-independent) E2 ubiquitin-conjugating enzyme D3) (EC 2.3.2.24) (E2 ubiquitin-conjugating enzyme D3) (Ubiquitin carrier protein D3) (Ubiquitin-conjugating enzyme E2(17)KB 3) (Ubiquitin-conjugating enzyme E2-17 kDa 3) (Ubiquitin-protein ligase D3) |
| Q9CZY3 | UB2V1_MOUSE | Ubiquitin-conjugating enzyme E2 variant 1 (UEV-1) (CROC-1)                                                                                                                                                                                                                                                  |
| Q9D2M8 | UB2V2_MOUSE | Ubiquitin-conjugating enzyme E2 variant 2 (Ubc-like protein MMS2)                                                                                                                                                                                                                                           |
| Q02053 | UBA1_MOUSE  | Ubiquitin-like modifier-activating enzyme 1 (EC 6.2.1.45) (Ubiquitin-activating enzyme E1) (Ubiquitin-activating enzyme E1 X) (Ubiquitin-like modifier-activating enzyme 1 X)                                                                                                                               |
| O70475 | UGDH_MOUSE  | UDP-glucose 6-dehydrogenase (UDP-Glc dehydrogenase) (UDP-GlcDH) (UDPGDH) (EC 1.1.1.22)                                                                                                                                                                                                                      |
| Q91YN5 | UAP1_MOUSE  | UDP-N-acetylhexosamine pyrophosphorylase [Includes: UDP-N-acetylgalactosamine pyrophosphorylase (EC 2.7.7.83); UDP-N-acetylglucosamine pyrophosphorylase (EC 2.7.7.23)]                                                                                                                                     |
| Q9DBP5 | KCY_MOUSE   | UMP-CMP kinase (EC 2.7.4.14) (Deoxycytidylate kinase) (CK) (dCMP kinase) (Nucleoside-diphosphate kinase) (EC 2.7.4.6) (Uridine monophosphate/cytidine monophosphate kinase) (UMP/CMP kinase) (UMP/CMPK)                                                                                                     |
| Q9JMH9 | MY18A_MOUSE | Unconventional myosin-XVIIIa (Molecule associated with JAK3 N-terminus) (MAJN) (Myosin containing a PDZ domain) (Surfactant protein receptor SP-R210) (SP-R210)                                                                                                                                             |
| P13439 | UMPS_MOUSE  | Uridine 5'-monophosphate synthase (UMP synthase) [Includes: Orotate phosphoribosyltransferase (OPRTase) (EC 2.4.2.10); Orotidine 5'-phosphate decarboxylase (EC 4.1.1.23) (OMPdecase)]                                                                                                                      |
| Q8VC12 | HUTU_MOUSE  | Urocanate hydratase (Urocanase) (EC 4.2.1.49) (Imidazolonepropionate hydrolase)                                                                                                                                                                                                                             |
| P70697 | DCUP_MOUSE  | Uroporphyrinogen decarboxylase (UPD) (URO-D) (EC 4.1.1.37)                                                                                                                                                                                                                                                  |

|        |             |                                                                                                                                                                                                                                          |
|--------|-------------|------------------------------------------------------------------------------------------------------------------------------------------------------------------------------------------------------------------------------------------|
| Q91ZJ5 | UGPA_MOUSE  | UTP--glucose-1-phosphate uridylyltransferase (EC 2.7.7.9) (UDP-glucose pyrophosphorylase) (UDPGP) (UGPase)                                                                                                                               |
| Q9QZ88 | VPS29_MOUSE | Vacuolar protein sorting-associated protein 29 (Vesicle protein sorting 29)                                                                                                                                                              |
| Q8R5L3 | VPS39_MOUSE | Vam6/Vps39-like protein                                                                                                                                                                                                                  |
| P70460 | VASP_MOUSE  | Vasodilator-stimulated phosphoprotein (VASP)                                                                                                                                                                                             |
| Q9CZT5 | VASN_MOUSE  | Vasorin (Protein slit-like 2)                                                                                                                                                                                                            |
| Q62059 | CSPG2_MOUSE | Versican core protein (Chondroitin sulfate proteoglycan core protein 2) (Chondroitin sulfate proteoglycan 2) (Large fibroblast proteoglycan) (PG-M)                                                                                      |
| Q9DBH5 | LMAN2_MOUSE | Vesicular integral-membrane protein VIP36 (Lectin mannose-binding 2) (Vesicular integral-membrane protein 36) (VIP36)                                                                                                                    |
| P20152 | VIME_MOUSE  | Vimentin                                                                                                                                                                                                                                 |
| Q64727 | VINC_MOUSE  | Vinculin (Metavinculin)                                                                                                                                                                                                                  |
| P29788 | VTNC_MOUSE  | Vitronectin (VN) (S-protein) (Serum-spreading factor)                                                                                                                                                                                    |
| O08532 | CA2D1_MOUSE | Voltage-dependent calcium channel subunit alpha-2/delta-1 (Voltage-gated calcium channel subunit alpha-2/delta-1) [Cleaved into: Voltage-dependent calcium channel subunit alpha-2-1; Voltage-dependent calcium channel subunit delta-1] |
| Q8CIZ8 | VWF_MOUSE   | von Willebrand factor (vWF) [Cleaved into: von Willebrand antigen 2 (von Willebrand antigen II)]                                                                                                                                         |
| P50516 | VATA_MOUSE  | V-type proton ATPase catalytic subunit A (V-ATPase subunit A) (EC 7.1.2.2) (V-ATPase 69 kDa subunit) (Vacuolar proton pump subunit alpha)                                                                                                |
| P62814 | VATB2_MOUSE | V-type proton ATPase subunit B, brain isoform (V-ATPase subunit B 2) (Endomembrane proton pump 58 kDa subunit) (Vacuolar proton pump subunit B 2)                                                                                        |
| O88342 | WDR1_MOUSE  | WD repeat-containing protein 1 (Actin-interacting protein 1) (AIP1)                                                                                                                                                                      |
| Q6P1B1 | XPP1_MOUSE  | Xaa-Pro aminopeptidase 1 (EC 3.4.11.9) (Aminoacylproline aminopeptidase) (Cytosolic aminopeptidase P) (Soluble aminopeptidase P) (sAmp) (X-Pro aminopeptidase 1) (X-prolyl aminopeptidase 1, soluble)                                    |

|        |             |                                                                                                                                        |
|--------|-------------|----------------------------------------------------------------------------------------------------------------------------------------|
| Q11136 | PEPD_MOUSE  | Xaa-Pro dipeptidase (X-Pro dipeptidase) (EC 3.4.13.9) (Imidodipeptidase) (Peptidase 4) (Peptidase D) (Proline dipeptidase) (Prolidase) |
| Q9EPL0 | XYLT2_MOUSE | Xylosyltransferase 2 (EC 2.4.2.26) (Peptide O-xylosyltransferase 2) (Xylosyltransferase II)                                            |
| Q62523 | ZYX_MOUSE   | Zyxin                                                                                                                                  |
