# Supplementary material
Source: PubMed Central journal article supplement (PMC9492804)
Supplement: NIHMS1791440-supplement-tS3B.pdf [file NIHMS1791440-supplement-tS3B.pdf]

**Quantified Proteins**

Proteins in green indicate a q value < 0.05

| <u>Accession</u>   | <u>Control 1</u> | <u>Control 2</u> | <u>Control 3</u> | <u>Control 4</u> | <u>Control 5</u> | <u>Primed 1</u> | <u>Primed 2</u> | <u>Primed 3</u> | <u>Primed 4</u> | <u>Primed 5</u> | <u>Q Value</u> | <u>P Value</u> | <u>Log<sub>2</sub>(Fold Change)</u> |
|--------------------|------------------|------------------|------------------|------------------|------------------|-----------------|-----------------|-----------------|-----------------|-----------------|----------------|----------------|-------------------------------------|
| Q62059 CSPG2_MOUSE | 4919.033         | 4770.865         | 3558.724         | 4343.815         | 3999.383         | 11963.76        | 10740.57        | 10275.42        | 9888.237        | 10150.13        | 0.000319       | 6.01E-07       | 1.296000498                         |
| Q05793 PGBM_MOUSE  | 3530.583         | 2931.574         | 1471.557         | 2113.638         | 3538.669         | 11748.19        | 7173.483        | 9910.886        | 9539.86         | 9726.167        | 0.009081       | 3.42E-05       | 1.823871261                         |
| Q8BM72 HSP13_MOUSE | 619.5782         | 535.9            | 605.3596         | 678.1705         | 434.6551         | 136.8114        | 123.2336        | 322.2616        | 123.5549        | 147.166         | 0.016181       | 9.73E-05       | -1.752226751                        |
| P97298 PEDF_MOUSE  | 36170.91         | 47811.09         | 42804.3          | 44958.67         | 53090.84         | 14101.97        | 25292.96        | 20016           | 25286.35        | 18467.17        | 0.016181       | 0.000122       | -1.123926026                        |
| Q08879 FBLN1_MOUSE | 9251             | 7458.645         | 10500.3          | 11002.21         | 12376.32         | 2929.393        | 2326.412        | 3804.726        | 3284.471        | 5607.222        | 0.019725       | 0.000186       | -1.494645882                        |
| Q8CIZ8 VWF_MOUSE   | 1029.281         | 746.5493         | 788.9397         | 889.1782         | 535.2648         | 1966.265        | 1542.215        | 2019.039        | 1404.636        | 1584.038        | 0.023931       | 0.00027        | 1.094104564                         |
| Q9R182 ANGL3_MOUSE | 884.125          | 887.595          | 927.6566         | 562.2435         | 1242.423         | 204.2233        | 357.5966        | 221.301         | 129.8209        | 120.8931        | 0.024887       | 0.000328       | -2.123214935                        |
| Q00623 APOA1_MOUSE | 10925.98         | 17679.16         | 16706.43         | 15259.93         | 16463.88         | 5147.236        | 8973.714        | 5406.879        | 6890.948        | 8720.364        | 0.02506        | 0.000379       | -1.132442123                        |
| P48759 PTX3_MOUSE  | 20556.9          | 16599.71         | 23699.73         | 27324.24         | 21149.66         | 58968.39        | 37516.38        | 51416.97        | 40522.25        | 43992.37        | 0.02506        | 0.000425       | 1.088019249                         |
| Q8K482 EMIL2_MOUSE | 2268.178         | 1173.93          | 759.7379         | 649.9911         | 1734.037         | 3590.394        | 3392.027        | 2752.235        | 2919.991        | 3167.76         | 0.033225       | 0.000626       | 1.264522261                         |
| P02468 LAMC1_MOUSE | 6482.818         | 5532.283         | 3978.727         | 5330.756         | 7868.512         | 12169.11        | 8996.724        | 9423.652        | 10136.89        | 9918.578        | 0.04669        | 0.000967       | 0.79479122                          |
| P41731 CD63_MOUSE  | 415.5951         | 577.5471         | 327.0192         | 603.639          | 1001.269         | 2143.808        | 1596.51         | 3024.008        | 1445.643        | 1913.36         | 0.061389       | 0.001387       | 1.791141049                         |
| Q80YX1 TENA_MOUSE  | 1124.176         | 1253.563         | 734.9491         | 1510.046         | 877.49           | 3244.464        | 2677.238        | 3131.983        | 2089.677        | 1762.247        | 0.064385       | 0.001671       | 1.230436304                         |
| P62806 H4_MOUSE    | 587.0259         | 979.0659         | 905.9843         | 1444.186         | 863.1097         | 4172.299        | 2451.608        | 2203.856        | 2212.132        | 2829.181        | 0.064385       | 0.001698       | 1.536978852                         |
| P00687 AMY1_MOUSE  | 967.7813         | 3019.785         | 2321.268         | 2209.017         | 2935.239         | 107.8503        | 564.0197        | 976.8553        | 161.6498        | 575.6002        | 0.068285       | 0.001929       | -2.263085935                        |
| P01942 HBA_MOUSE   | 282104.5         | 260807.1         | 256228.6         | 231931.4         | 216883.5         | 337598.2        | 410774.7        | 338640.1        | 388314.9        | 293335.6        | 0.070915       | 0.002281       | 0.503093748                         |
| O08992 SDCB1_MOUSE | 2595.574         | 1635.391         | 1792.927         | 1512.472         | 1246.421         | 2499.231        | 3146.783        | 3251.187        | 2956.406        | 2729.642        | 0.070915       | 0.00241        | 0.731561818                         |
| P47856 GFPT1_MOUSE | 78.77274         | 124.7417         | 146.062          | 155.4445         | 161.4797         | 47.28534        | 64.29073        | 25.81169        | 56.00776        | 85.27704        | 0.070915       | 0.002499       | -1.258035424                        |
| Q3U962 CO5A2_MOUSE | 3052.136         | 2913.609         | 2797.021         | 3143.721         | 3213.996         | 2691.75         | 1024.163        | 1752.333        | 1976.882        | 1633.951        | 0.070915       | 0.002581       | -0.735886297                        |
| P01029 CO4B_MOUSE  | 963.1027         | 1345.097         | 1808.426         | 1515.384         | 1688.486         | 273.9399        | 820.8571        | 767.9607        | 768.9639        | 813.451         | 0.070915       | 0.002671       | -1.087365119                        |
| P07091 S10A4_MOUSE | 293.5304         | 517.1602         | 82.94434         | 275.0162         | 823.8189         | 1123.766        | 902.071         | 805.993         | 1024.896        | 1066.243        | 0.0745         | 0.002946       | 1.304970682                         |
| P62702 RS4X_MOUSE  | 46.97762         | 142.5788         | 269.96           | 181.4893         | 37.71923         | 323.5402        | 439.4628        | 315.4652        | 268.669         | 369.679         | 0.095639       | 0.00404        | 1.338836647                         |
| P21956 MFGM_MOUSE  | 1788.463         | 1539.387         | 852.283          | 1647.487         | 3168.251         | 3776.956        | 3732.94         | 2966.458        | 3671.368        | 3067.165        | 0.095639       | 0.004284       | 0.936321842                         |
| Q9DCT1 AKCL2_MOUSE | 6795             | 4317.131         | 4852.458         | 3816.285         | 1842.364         | 6468.985        | 9067.428        | 9937.705        | 8114.423        | 7648.575        | 0.095639       | 0.004323       | 0.931360808                         |
| P62962 PROF1_MOUSE | 7735.988         | 10249.44         | 17281.96         | 12212.66         | 18282.2          | 4222.997        | 6272.47         | 4553.744        | 5380.095        | 6010.218        | 0.109555       | 0.005158       | -1.314563316                        |
| Q2PZL6 FAT4_MOUSE  | 56.73333         | 212.8234         | 910.2471         | 582.1994         | 762.1523         | 17341.51        | 16859.22        | 12679.38        | 13706.24        | 261.265         | 0.115149       | 0.005638       | 4.59132794                          |
| E9Q414 APOB_MOUSE  | 2809.758         | 14010.68         | 19233.64         | 10395.34         | 16745.42         | 1226.754        | 2261.9          | 2583.255        | 1915.184        | 2138.783        | 0.119483       | 0.006075       | -2.641760085                        |
| P10126 EF1A1_MOUSE | 712.7177         | 1911.685         | 2115.468         | 2108.933         | 3085.5           | 309.0186        | 828.7452        | 565.9402        | 719.6849        | 280.8213        | 0.119605       | 0.006307       | -1.87721158                         |
| P10493 NID1_MOUSE  | 6326.243         | 5175.372         | 3293.274         | 5010.053         | 6155.556         | 14317.11        | 7263.191        | 8358.45         | 9527.14         | 10538.02        | 0.122462       | 0.006731       | 0.945722962                         |
| Q9RON0 GALK1_MOUSE | 1311.798         | 1697.229         | 2822.171         | 2105.616         | 2219.615         | 459.6664        | 1177.678        | 701.4821        | 1011.468        | 1369.168        | 0.122462       | 0.007026       | -1.105698729                        |

|                    |          |          |          |          |          |          |          |          |          |          |          |          |              |
|--------------------|----------|----------|----------|----------|----------|----------|----------|----------|----------|----------|----------|----------|--------------|
| Q32NZ6 TMC5_MOUSE  | 62968.59 | 370895.8 | 228538.3 | 200403.9 | 365048.3 | 17760.83 | 42891.46 | 46224.23 | 46157.48 | 45599.17 | 0.122462 | 0.007229 | -2.627961444 |
| Q66JQ7 KNL1_MOUSE  | 2808.451 | 3202.996 | 7206.155 | 6526.981 | 4665.518 | 2158.437 | 1220.886 | 1740.422 | 1600.392 | 1955.128 | 0.122462 | 0.007592 | -1.492498458 |
| Q640N1 AEBP1_MOUSE | 1079.371 | 2472.496 | 2053.326 | 1718.485 | 3089.512 | 637.1311 | 1086.221 | 682.2033 | 847.2361 | 966.0402 | 0.122462 | 0.007611 | -1.303496514 |
| Q8JZK9 HMCS1_MOUSE | 242.4726 | 164.507  | 388.2039 | 289.3672 | 600.5016 | 45.12359 | 46.69549 | 168.1288 | 53.86958 | 29.08895 | 0.149311 | 0.009563 | -2.296906859 |
| Q8R1A4 DOCK7_MOUSE | 103526.7 | 53940.17 | 189310.3 | 153326.1 | 187998.2 | 19230.4  | 64257.64 | 60548.52 | 54454.13 | 27088.33 | 0.149311 | 0.010176 | -1.608988422 |
| P16125 LDHB_MOUSE  | 2064.617 | 1155.025 | 1995.182 | 1253.553 | 1103.047 | 1060.112 | 753.212  | 754.486  | 653.0569 | 364.5823 | 0.149311 | 0.010447 | -1.078410881 |
| P16858 G3P_MOUSE   | 3324.598 | 6102.1   | 7592.003 | 3660.261 | 5238.192 | 863.1328 | 3148.642 | 1794.445 | 3194.03  | 1954.445 | 0.149311 | 0.01066  | -1.242358143 |
| P19221 THRB_MOUSE  | 18445.41 | 40122.85 | 40269.7  | 28195.14 | 47546.12 | 6626.531 | 23385.59 | 14075.64 | 17004.39 | 17530.84 | 0.149311 | 0.011034 | -1.150858636 |
| O35074 PTGIS_MOUSE | 1274.879 | 96.893   | 94.89011 | 219.1967 | 144.5888 | 1113.019 | 1053.869 | 1279.425 | 1061.52  | 1093.443 | 0.149311 | 0.01169  | 1.613558711  |
| P37889 FBLN2_MOUSE | 23725.26 | 20647.89 | 17039.09 | 20786.78 | 18514.12 | 33681.94 | 21587.94 | 28844.49 | 24989.42 | 31336.41 | 0.149311 | 0.011826 | 0.479704107  |
| Q8R5L3 VPS39_MOUSE | 15860.85 | 3240.326 | 3390.556 | 7759.444 | 7602.648 | 33731.42 | 13166.76 | 29597.09 | 15658.28 | 20105.76 | 0.149311 | 0.011826 | 1.56832421   |
| Q8VCM7 FIBG_MOUSE  | 3596.632 | 6998.9   | 6491.03  | 4779.389 | 7174.245 | 1183.285 | 4705.545 | 2707.653 | 3125.965 | 2871.465 | 0.149311 | 0.01204  | -0.992684462 |
| Q76MZ3 2AAA_MOUSE  | 1113.479 | 1341.724 | 1696.611 | 995.985  | 1050.975 | 414.6155 | 942.4797 | 915.3636 | 711.6135 | 371.6584 | 0.149311 | 0.012091 | -0.88535591  |
| P17742 PPIA_MOUSE  | 5088.686 | 7582.625 | 7785.268 | 7098.813 | 11310.86 | 3115.117 | 4796.021 | 2959.504 | 5154.828 | 5164.322 | 0.162974 | 0.013504 | -0.875148676 |
| P70663 SPRL1_MOUSE | 187.138  | 387.5398 | 192.7536 | 185.409  | 299.432  | 30.69834 | 57.22445 | 36.32735 | 100.5925 | 211.4637 | 0.163462 | 0.01444  | -1.521135131 |
| P07724 ALBU_MOUSE  | 58146.3  | 61445.61 | 75170.58 | 74304.94 | 108818   | 29795.2  | 40614.45 | 38807.63 | 53812.95 | 56075.3  | 0.163462 | 0.014562 | -0.786322875 |
| P21550 ENOB_MOUSE  | 3792.076 | 6708.603 | 5929.516 | 4130.418 | 5656.931 | 1519.319 | 4148.476 | 2983.484 | 3634.921 | 2936.852 | 0.163462 | 0.014597 | -0.784274971 |
| Q99JY9 ARP3_MOUSE  | 3760.81  | 7147.043 | 6155.866 | 4363.311 | 3247.252 | 1475.604 | 3672.864 | 2187.533 | 2436.383 | 2185.61  | 0.163462 | 0.014776 | -1.045032739 |
| P29788 VTNC_MOUSE  | 14869.74 | 16190.27 | 11674.26 | 10562.35 | 20329.16 | 17742.42 | 22533.06 | 30850.61 | 22383.39 | 22337.82 | 0.163928 | 0.015127 | 0.653941306  |
| P08226 APOE_MOUSE  | 4848.334 | 4769.793 | 4003.372 | 4746.62  | 4786.587 | 6202.397 | 6360.3   | 6389.991 | 4676.385 | 5260.867 | 0.174111 | 0.016395 | 0.319261671  |
| P49429 HPPD_MOUSE  | 840.1812 | 2902.515 | 2531.081 | 1775.898 | 4970.224 | 355.0514 | 682.2468 | 702.7021 | 471.5205 | 406.5079 | 0.176677 | 0.016969 | -2.314165475 |
| O08710 THYG_MOUSE  | 678.8239 | 730.2819 | 1304.657 | 720.5455 | 1026.223 | 409.8722 | 626.8701 | 573.431  | 158.2921 | 514.9515 | 0.179268 | 0.017555 | -0.966021582 |
| Q9CRB5 PR7C1_MOUSE | 24715.28 | 19415.38 | 24006.16 | 19064.96 | 14057.45 | 16820.19 | 16074.49 | 13341.42 | 12127.39 | 10766.33 | 0.212077 | 0.021168 | -0.55067292  |
| P56501 UCP3_MOUSE  | 203.3783 | 528.3489 | 138.6233 | 198.6322 | 98.91308 | 323.1473 | 668.9602 | 1467.843 | 1703.42  | 771.5627 | 0.22612  | 0.023229 | 2.079118895  |
| Q8CI94 PYGB_MOUSE  | 143.1958 | 281.0948 | 448.7322 | 318.7629 | 189.0092 | 136.2968 | 116.1817 | 122.4614 | 136.8821 | 127.2538 | 0.22612  | 0.024164 | -1.111440252 |
| Q78JT3 3HAO_MOUSE  | 497.782  | 360.8352 | 655.2994 | 696.0272 | 855.9622 | 1453.397 | 876.5125 | 1055.521 | 739.4556 | 983.6168 | 0.22612  | 0.024209 | 0.736587261  |
| P61971 NTF2_MOUSE  | 403.3434 | 279.0982 | 261.7776 | 649.432  | 733.9825 | 42.47269 | 285.8302 | 56.62084 | 272.4759 | 155.8861 | 0.22612  | 0.024273 | -1.517029735 |
| P58022 LOXL2_MOUSE | 123.4993 | 83.46609 | 73.49769 | 142.3448 | 240.4183 | 220.0363 | 686.0244 | 278.0934 | 912.6296 | 405.2279 | 0.231476 | 0.025284 | 1.915515662  |
| Q99JI6 RAP1B_MOUSE | 567.9592 | 643.1453 | 298.0769 | 228.1049 | 663.1035 | 133.059  | 203.7037 | 345.0382 | 206.6472 | 187.3271 | 0.234372 | 0.026041 | -1.157892023 |
| P23591 FCL_MOUSE   | 740.8918 | 204.4276 | 300.6013 | 344.8431 | 38.52003 | 545.9964 | 900.6044 | 834.1586 | 787.009  | 487.9765 | 0.236108 | 0.026679 | 1.125913807  |
| P06745 G6PI_MOUSE  | 538.0002 | 1182.99  | 1507.195 | 750.8026 | 975.0537 | 810.7781 | 511.4855 | 363.2604 | 429.7254 | 247.762  | 0.242373 | 0.027843 | -1.067979382 |
| P99024 TBB5_MOUSE  | 766.8603 | 1527.768 | 1166.83  | 1093.462 | 1810.876 | 585.244  | 636.8752 | 812.421  | 900.7693 | 872.0574 | 0.243027 | 0.028376 | -0.741547462 |
| Q8VC97 BUP1_MOUSE  | 97.82159 | 545.0934 | 282.4923 | 223.3479 | 464.5619 | 63.58365 | 124.6107 | 54.34262 | 123.2388 | 147.5161 | 0.248688 | 0.029505 | -1.652178608 |
| G5E8P1 BRD1_MOUSE  | 176.758  | 222.1142 | 367.4716 | 446.3042 | 202.3584 | 1180.822 | 442.0489 | 1730.855 | 1572.875 | 314.5781 | 0.255306 | 0.031151 | 1.889082641  |

|                    |          |          |          |          |          |          |          |          |          |          |          |          |              |
|--------------------|----------|----------|----------|----------|----------|----------|----------|----------|----------|----------|----------|----------|--------------|
| O88844 IDHC_MOUSE  | 1002.237 | 518.6853 | 946.7196 | 1383.848 | 475.8301 | 203.895  | 476.0494 | 489.5044 | 355.6943 | 490.9511 | 0.255306 | 0.031252 | -1.10191094  |
| Q8K1B8 URP2_MOUSE  | 1033.468 | 1491.376 | 1362.422 | 1239.027 | 932.7242 | 434.9066 | 652.6165 | 1026.147 | 839.6452 | 1093.231 | 0.279181 | 0.035032 | -0.582392481 |
| Q920E5 FPPS_MOUSE  | 144.62   | 294.8818 | 243.0408 | 88.4476  | 314.0114 | 36.47987 | 87.57244 | 66.56602 | 74.48937 | 185.1102 | 0.279181 | 0.03562  | -1.269001764 |
| Q9R1P4 PSA1_MOUSE  | 276.9729 | 294.2581 | 202.8829 | 193.8357 | 429.2288 | 990.3909 | 333.506  | 515.9096 | 1078.054 | 1847.675 | 0.279181 | 0.035752 | 1.770122186  |
| Q811B3 ATS12_MOUSE | 119.39   | 99.88015 | 71.16706 | 88.89243 | 106.736  | 82.13213 | 223.635  | 129.1738 | 194.3928 | 188.0961 | 0.291715 | 0.038264 | 0.749943765  |
| Q9CVB6 ARPC2_MOUSE | 375.6235 | 277.4121 | 507.6377 | 413.5577 | 275.2477 | 226.5545 | 370.9614 | 185.585  | 87.38269 | 195.6752 | 0.291715 | 0.038647 | -0.794696435 |
| P07901 HS90A_MOUSE | 1057.66  | 2280.932 | 2746.766 | 2310.783 | 2814.921 | 591.3143 | 1456.212 | 646.0082 | 1614.673 | 1865.8   | 0.291715 | 0.039096 | -0.860643813 |
| P01831 THY1_MOUSE  | 408.5473 | 319.6055 | 166.6336 | 135.6272 | 184.8024 | 267.2942 | 514.5875 | 385.1667 | 910.4125 | 634.2901 | 0.291715 | 0.040087 | 1.158011904  |
| Q8ROY6 AL1L1_MOUSE | 1194.603 | 750.2598 | 1142.775 | 2054.713 | 1480.328 | 545.5692 | 831.1149 | 1147.837 | 351.7657 | 626.0942 | 0.291715 | 0.040398 | -0.919078736 |
| P17182 ENOA_MOUSE  | 8663.873 | 8399.598 | 9757.437 | 8451.807 | 8941.134 | 5292.045 | 8836.375 | 7233.034 | 8192.448 | 6558.984 | 0.291715 | 0.041633 | -0.29198456  |
| P35700 PRDX1_MOUSE | 132.2779 | 565.2421 | 257.156  | 340.0905 | 691.2311 | 47.71253 | 317.6679 | 137.9097 | 53.36909 | 39.75253 | 0.291715 | 0.041692 | -1.735483229 |
| P50516 VATA_MOUSE  | 135.8975 | 271.5096 | 71.87378 | 70.01379 | 152.3486 | 150.26   | 247.6647 | 323.9183 | 286.3957 | 475.7993 | 0.291715 | 0.041997 | 1.080718562  |
| A6X935 ITI4_MOUSE  | 8284.288 | 8493.161 | 17543.6  | 11907.02 | 3159.903 | 4125.96  | 5656.8   | 4765.595 | 3659.332 | 1121.978 | 0.291715 | 0.042301 | -1.353343213 |
| P40124 CAP1_MOUSE  | 1922.462 | 2825.205 | 3085.917 | 2442.717 | 2806.995 | 1696.579 | 2217.458 | 2060.31  | 2258.002 | 2150.701 | 0.295198 | 0.043362 | -0.333495687 |
| P10107 ANXA1_MOUSE | 130.6198 | 51.42674 | 29.14246 | 91.33775 | 68.12512 | 279.5068 | 164.7658 | 110.2133 | 276.0797 | 77.23338 | 0.295585 | 0.044743 | 1.292308011  |
| P48758 CBR1_MOUSE  | 377.7068 | 981.8954 | 1205.305 | 602.1742 | 733.2512 | 403.725  | 413.9843 | 532.4106 | 505.7629 | 89.3117  | 0.295585 | 0.044895 | -1.003682834 |
| P63001 RAC1_MOUSE  | 1903.437 | 1047.603 | 2700.801 | 1469.009 | 631.3541 | 603.1964 | 843.3721 | 642.3166 | 742.7568 | 652.6872 | 0.295585 | 0.045089 | -1.153725705 |
| Q60675 LAMA2_MOUSE | 4000.868 | 2250.569 | 688.5101 | 694.1573 | 1515.959 | 5223.08  | 4027.809 | 3912.655 | 3141.677 | 2197.684 | 0.300127 | 0.046347 | 1.015898189  |
| P22777 PAI1_MOUSE  | 3410.244 | 1259.436 | 1893.114 | 1306.321 | 867.1    | 735.4416 | 750.5272 | 853.3726 | 474.779  | 634.7025 | 0.301718 | 0.047228 | -1.340904334 |
| Q62000 MIME_MOUSE  | 1318.655 | 3519.278 | 2471.367 | 1837.602 | 3562.333 | 562.1942 | 1468.374 | 1709.861 | 1656.742 | 1542.031 | 0.301718 | 0.047729 | -0.873035693 |
| P01027 CO3_MOUSE   | 80756.42 | 98506.75 | 93195.37 | 92818.57 | 105075.3 | 71337.19 | 96624.45 | 74803.95 | 83872.4  | 69559.84 | 0.307353 | 0.0492   | -0.247521113 |
| O70435 PSA3_MOUSE  | 77.25349 | 149.6905 | 525.0928 | 317.8261 | 281.0392 | 47.16347 | 66.17129 | 70.71684 | 147.2652 | 105.8152 | 0.30767  | 0.04983  | -1.627782248 |
| P14602 HSPB1_MOUSE | 382.0796 | 157.9772 | 119.1009 | 176.1886 | 731.5276 | 281.4403 | 829.1476 | 575.3267 | 832.676  | 1031.117 | 0.307925 | 0.050451 | 1.179811194  |
| Q9R0E1 PLOD3_MOUSE | 391.7918 | 5184.744 | 9241.447 | 6906.41  | 591.8757 | 722.7547 | 455.9511 | 631.2956 | 274.455  | 326.6705 | 0.314738 | 0.05216  | -3.21031634  |
| Q9WUM4 COR1C_MOUSE | 7125.142 | 480.7991 | 6219.178 | 5624.664 | 554.5873 | 8771.168 | 7494.735 | 8563.541 | 7741.264 | 5205.257 | 0.31789  | 0.054056 | 0.917153446  |
| Q9DBF1 AL7A1_MOUSE | 540.9457 | 54.40171 | 80.79852 | 31.09876 | 142.2275 | 460.3277 | 773.3105 | 756.3459 | 599.8367 | 61.07364 | 0.31789  | 0.055733 | 1.64184063   |
| Q8BKG3 PTK7_MOUSE  | 53.92123 | 398.9614 | 630.2419 | 422.6431 | 271.1438 | 98.69063 | 160.3296 | 35.9203  | 196.142  | 178.353  | 0.31789  | 0.056309 | -1.408354757 |
| Q9JHH6 CBPB2_MOUSE | 1249.68  | 1808.494 | 1470.371 | 1087.254 | 3849.986 | 552.315  | 1109.212 | 561.6592 | 496.4502 | 971.2374 | 0.31789  | 0.05684  | -1.358759611 |
| O88307 SORL_MOUSE  | 16707.22 | 2360.059 | 1715.57  | 5422.044 | 420.1975 | 10322.46 | 10094.23 | 17226.61 | 11171.21 | 13983.73 | 0.31789  | 0.057116 | 1.237937799  |
| Q61554 FBN1_MOUSE  | 3297.849 | 1974.948 | 2394.671 | 2635.701 | 2079.107 | 2648.203 | 1654.603 | 833.5782 | 1131.214 | 1778.143 | 0.31789  | 0.057303 | -0.621979391 |
| P08030 APT_MOUSE   | 156.9613 | 433.317  | 634.8956 | 684.2495 | 115.9162 | 117.3226 | 134.4017 | 204.6665 | 175.0243 | 60.94834 | 0.31789  | 0.057352 | -1.548562059 |
| Q91Y47 FA11_MOUSE  | 169.9625 | 749.2538 | 151.5394 | 703.6027 | 454.6106 | 52.1669  | 249.7908 | 36.10026 | 177.3957 | 225.8613 | 0.31789  | 0.057472 | -1.588218002 |
| Q9JJN5 CBPN_MOUSE  | 1279.002 | 3222.355 | 4364.867 | 2864.23  | 5868.212 | 1298.901 | 2800.395 | 1514.18  | 1642.25  | 1342.785 | 0.319431 | 0.058352 | -1.033307027 |
| Q9D1A2 CNDP2_MOUSE | 550.9076 | 737.4283 | 566.319  | 603.7592 | 1099.095 | 760.1647 | 1454.15  | 967.0172 | 1369.567 | 884.3749 | 0.322932 | 0.059599 | 0.611484991  |

|                    |          |          |          |          |          |          |          |          |          |          |          |          |              |
|--------------------|----------|----------|----------|----------|----------|----------|----------|----------|----------|----------|----------|----------|--------------|
| P70213 FV1_MOUSE   | 1122.133 | 114.13   | 581.66   | 360.4512 | 490.4566 | 2257.866 | 510.2434 | 1273.215 | 950.3021 | 1307.186 | 0.323543 | 0.060608 | 1.238872158  |
| B9EKR1 PTRZ_MOUSE  | 183.2411 | 34.70518 | 33.51784 | 54.69711 | 212.8244 | 155.8397 | 234.9184 | 543.5365 | 449.1677 | 128.7857 | 0.323543 | 0.060931 | 1.542928282  |
| P60335 PCBP1_MOUSE | 112.6084 | 367.8829 | 185.8459 | 120.2948 | 386.9685 | 126.1095 | 170.9781 | 32.49297 | 23.10701 | 108.6985 | 0.331994 | 0.063148 | -1.346895064 |
| Q9WVA4 TAGL2_MOUSE | 1571.359 | 4859.172 | 2334.989 | 1555.406 | 4707.247 | 638.3008 | 1411.5   | 1230.178 | 1806.381 | 1706.025 | 0.334563 | 0.064337 | -1.145679355 |
| P12023 A4_MOUSE    | 312.7487 | 263.337  | 179.0739 | 306.5905 | 205.6528 | 657.392  | 425.2146 | 818.3325 | 677.2386 | 87.58018 | 0.334563 | 0.064896 | 1.07267046   |
| Q9JHU4 DYHC1_MOUSE | 305.375  | 220.3002 | 144.4965 | 240.4993 | 231.4317 | 393.9186 | 139.989  | 480.9262 | 428.3106 | 381.9554 | 0.336809 | 0.065966 | 0.676283039  |
| Q8BH00 AL8A1_MOUSE | 593.2808 | 55.75435 | 2195.482 | 1619.04  | 652.4618 | 59.78276 | 333.3559 | 75.00866 | 209.6118 | 322.6879 | 0.342381 | 0.068317 | -2.354376683 |
| Q6IFX2 K1C42_MOUSE | 40.54763 | 209.599  | 98.6787  | 101.2387 | 210.0519 | 105.2405 | 466.6483 | 242.7249 | 259.8663 | 286.0971 | 0.342381 | 0.069478 | 1.043427482  |
| Q8BI06 CEMIP_MOUSE | 6239.778 | 467.2721 | 5278.428 | 4961.067 | 443.0717 | 1507.238 | 434.2761 | 901.0764 | 624.5358 | 669.9166 | 0.342381 | 0.069543 | -2.071554247 |
| Q99KK7 DPP3_MOUSE  | 383.2863 | 260.3429 | 225.0435 | 148.5217 | 369.7311 | 260.5485 | 512.4048 | 482.756  | 329.9455 | 603.4976 | 0.342381 | 0.069637 | 0.658482154  |
| O35696 SIA8B_MOUSE | 5224.555 | 1482.878 | 5749.427 | 4842.336 | 25.11806 | 948.516  | 2398.422 | 1076.374 | 211.4232 | 26.94076 | 0.343308 | 0.070472 | -1.893877607 |
| Q9CZ30 OLA1_MOUSE  | 221.1571 | 431.2464 | 322.4157 | 176.6232 | 237.8596 | 152.0209 | 156.1592 | 199.1272 | 169.4938 | 224.0702 | 0.346223 | 0.071722 | -0.624967433 |
| D3YXG0 HMCN1_MOUSE | 5894.655 | 224.2769 | 5687.505 | 3594.192 | 133.2575 | 1806.439 | 92.82415 | 69.95217 | 183.4571 | 98.84421 | 0.365603 | 0.076426 | -2.786449957 |
| P30412 PPIC_MOUSE  | 100.8544 | 403.8028 | 428.3248 | 165.3465 | 197.3026 | 99.93526 | 102.1577 | 113.8621 | 128.5832 | 170.6367 | 0.367061 | 0.077785 | -1.074586556 |
| Q9EPC1 PARVA_MOUSE | 37.16377 | 245.9697 | 263.0225 | 223.3653 | 253.3327 | 111.533  | 112.1937 | 52.09583 | 129.3056 | 156.8593 | 0.367061 | 0.078481 | -0.863990532 |
| Q91X52 DCXR_MOUSE  | 139.4146 | 645.2888 | 903.2444 | 408.0092 | 425.7664 | 22.10058 | 378.7797 | 67.60842 | 221.0871 | 358.2541 | 0.367061 | 0.080319 | -1.267005531 |
| P47931 FST_MOUSE   | 89.88081 | 141.5584 | 70.29038 | 63.01067 | 406.7392 | 309.4639 | 240.1435 | 810.4656 | 294.6723 | 341.8427 | 0.367061 | 0.080499 | 1.371836996  |
| P29416 HEXA_MOUSE  | 3185.444 | 264.0443 | 4010.443 | 473.1295 | 835.5781 | 396.2868 | 135.5185 | 100.7793 | 125.8113 | 313.7028 | 0.367061 | 0.081224 | -3.031915091 |
| Q8R1G2 CMBL_MOUSE  | 117.5155 | 389.3957 | 568.9255 | 299.6322 | 498.2084 | 65.61561 | 294.9751 | 174.5021 | 309.6205 | 103.9566 | 0.367061 | 0.082185 | -0.981894193 |
| P62908 RS3_MOUSE   | 149.8077 | 98.01824 | 112.1511 | 92.79652 | 198.5334 | 262.4559 | 222.2085 | 631.121  | 133.5326 | 973.1028 | 0.367061 | 0.082446 | 1.770722517  |
| P02104 HBE_MOUSE   | 590.3018 | 270.1175 | 472.2427 | 329.5493 | 326.9552 | 353.6842 | 65.8067  | 159.8743 | 178.1837 | 391.0587 | 0.367061 | 0.083226 | -0.792277845 |
| Q9QUR6 PPCE_MOUSE  | 58.71288 | 127.2806 | 102.3097 | 131.1769 | 40.31139 | 79.84258 | 80.16728 | 240.188  | 293.0999 | 380.9668 | 0.367061 | 0.083615 | 1.224297685  |
| Q8BWP8 B4GA1_MOUSE | 3289.015 | 1836.209 | 2372.723 | 1688.875 | 2881.15  | 764.1342 | 1507.231 | 1858.361 | 2400.994 | 1560.723 | 0.367061 | 0.084387 | -0.576714324 |
| Q07968 F13B_MOUSE  | 4331.14  | 417.1772 | 3838.889 | 4068.497 | 1352.71  | 1579.134 | 1048.016 | 1864.964 | 411.5389 | 834.9496 | 0.367061 | 0.084871 | -1.2875223   |
| Q9Z1Q5 CLIC1_MOUSE | 376.5464 | 668.3937 | 641.2313 | 558.4851 | 631.1602 | 534.3136 | 408.384  | 518.071  | 430.9295 | 198.4981 | 0.367061 | 0.085025 | -0.460333393 |
| P11499 HS90B_MOUSE | 3295.455 | 1984.641 | 1397.838 | 5896.734 | 2677.27  | 928.8337 | 1937.19  | 1059.162 | 1771.344 | 1690.834 | 0.369347 | 0.086731 | -1.045861103 |
| Q7TPZ8 CBPA1_MOUSE | 1838.595 | 1130.323 | 1687.541 | 1268.024 | 2285.329 | 735.811  | 1037.331 | 439.4213 | 1434.767 | 1631.382 | 0.369347 | 0.08745  | -0.637163016 |
| Q8C3I9 DIK2B_MOUSE | 5048.048 | 5696.31  | 3804.225 | 5891.151 | 10404.14 | 1196.221 | 3808.86  | 2907.218 | 3100.069 | 6289.508 | 0.369347 | 0.087642 | -0.83405539  |
| Q02788 CO6A2_MOUSE | 1302.076 | 1923.655 | 1790.907 | 1921.834 | 1058.006 | 3845.46  | 2181.666 | 1588.059 | 1782.659 | 2968.757 | 0.372349 | 0.089707 | 0.629012242  |
| Q05895 TSP3_MOUSE  | 3216.1   | 17088.9  | 8971.056 | 6889.132 | 28877.11 | 1235.616 | 4286.216 | 2898.739 | 4159.541 | 7371.329 | 0.372349 | 0.090259 | -1.704885272 |
| Q61703 ITIH2_MOUSE | 42420.63 | 72863.64 | 66224.65 | 61573.28 | 63365.69 | 44372.05 | 54705.21 | 48282.68 | 56532.58 | 49094.62 | 0.372349 | 0.090458 | -0.276577746 |
| P07214 SPRC_MOUSE  | 117.8137 | 323.3139 | 96.35995 | 161.7171 | 436.4565 | 152.3751 | 349.8159 | 570.8068 | 602.0546 | 467.52   | 0.373939 | 0.091548 | 0.915811413  |
| Q64374 RGN_MOUSE   | 3308.71  | 2483.33  | 1908.168 | 1232.381 | 2917.676 | 3200.878 | 3303.031 | 4374.846 | 3638.975 | 2196.861 | 0.375107 | 0.09254  | 0.496188733  |
| P15535 B4GT1_MOUSE | 1881.272 | 1194.954 | 695.8165 | 897.5407 | 669.2074 | 776.041  | 921.489  | 481.8217 | 388.5672 | 429.8906 | 0.383308 | 0.095286 | -0.832604324 |

|                    |          |          |          |          |          |          |          |          |          |          |          |          |              |
|--------------------|----------|----------|----------|----------|----------|----------|----------|----------|----------|----------|----------|----------|--------------|
| P19324 SERPH_MOUSE | 341.5797 | 526.0481 | 17950.5  | 1056.114 | 561.0986 | 12458    | 17811.49 | 21179.35 | 563.84   | 14884.21 | 0.386606 | 0.096833 | 1.710873172  |
| Q3UV17 K22O_MOUSE  | 510.7722 | 37.40706 | 288.0712 | 997.0553 | 50.57439 | 10078.99 | 13534.2  | 2053.835 | 179.176  | 1205.936 | 0.389256 | 0.09823  | 3.843963741  |
| Q9DBJ1 PGAM1_MOUSE | 411.3125 | 426.6032 | 588.5592 | 476.554  | 843.0263 | 277.3748 | 162.8841 | 255.9522 | 328.368  | 650.7009 | 0.391635 | 0.100456 | -0.712958428 |
| Q9R0P3 ESTD_MOUSE  | 2633.396 | 1019.405 | 1544.333 | 1406.568 | 43.40391 | 2177.588 | 2443.572 | 2832.184 | 2165.441 | 1445.548 | 0.391635 | 0.100549 | 0.735118267  |
| P58252 EF2_MOUSE   | 1011.975 | 2391.552 | 1708.747 | 1496.296 | 2610.26  | 920.8888 | 1104.792 | 1485.347 | 1338.468 | 1470.299 | 0.391635 | 0.101043 | -0.544705741 |
| Q3UQ28 PXDN_MOUSE  | 353.6404 | 458.574  | 387.1293 | 407.0733 | 666.6481 | 225.9388 | 786.1289 | 686.4922 | 943.3948 | 1212.102 | 0.394562 | 0.103072 | 0.761738853  |
| P08121 CO3A1_MOUSE | 5986.694 | 6044.539 | 5552.348 | 7046.325 | 4252.411 | 11160.1  | 6613.751 | 6795.444 | 7162.563 | 6363.066 | 0.394562 | 0.103484 | 0.399412237  |
| Q9WVK4 EHD1_MOUSE  | 693.6866 | 746.8627 | 777.0234 | 873.1019 | 256.6657 | 269.6262 | 378.6617 | 631.6657 | 242.8153 | 594.0063 | 0.394562 | 0.104238 | -0.661147205 |
| P70460 VASP_MOUSE  | 687.7221 | 739.7988 | 536.721  | 480.9124 | 664.6934 | 400.5419 | 787.2598 | 406.9587 | 196.0744 | 311.4842 | 0.394562 | 0.105875 | -0.564862354 |
| Q8VCX1 AK1D1_MOUSE | 64.85211 | 416.2208 | 325.6705 | 190.1876 | 477.7355 | 20.97397 | 193.2223 | 39.24259 | 268.7093 | 146.4081 | 0.394562 | 0.105876 | -1.141267803 |
| Q62465 VAT1_MOUSE  | 168.6837 | 286.9171 | 140.3983 | 105.808  | 147.3794 | 124.3503 | 290.9161 | 354.7309 | 223.3508 | 321.6146 | 0.394562 | 0.106841 | 0.630868696  |
| P62827 RAN_MOUSE   | 6242.689 | 3874.524 | 7339.043 | 5150.958 | 1303.441 | 2976.667 | 3430.57  | 3405.907 | 2472.425 | 1725.051 | 0.394562 | 0.107    | -0.771132771 |
| Q8BVI4 DHPR_MOUSE  | 366.9745 | 1043.716 | 625.0455 | 748.862  | 897.3547 | 526.6968 | 628.9825 | 381.4768 | 529.1771 | 508.2607 | 0.397191 | 0.108461 | -0.516126141 |
| Q64449 MRC2_MOUSE  | 252.9235 | 326.5591 | 269.5465 | 664.9028 | 304.5908 | 268.3416 | 105.5072 | 100.5667 | 121.3425 | 381.2649 | 0.409794 | 0.11326  | -0.896302893 |
| P60766 CDC42_MOUSE | 89.88261 | 404.7571 | 215.7977 | 247.0918 | 215.885  | 157.0697 | 185.5694 | 50.61454 | 197.3817 | 50.88254 | 0.409794 | 0.113446 | -0.871150942 |
| P61161 ARP2_MOUSE  | 200.927  | 261.8128 | 367.2669 | 296.9476 | 314.8011 | 337.0025 | 399.6534 | 356.7019 | 578.1877 | 280.6657 | 0.413062 | 0.115128 | 0.437282674  |
| P02798 MT2_MOUSE   | 502.0222 | 860.4924 | 583.6517 | 539.7548 | 654.3108 | 664.6142 | 1111.545 | 2069.807 | 1622.598 | 404.7336 | 0.417892 | 0.117261 | 0.903299887  |
| P40240 CD9_MOUSE   | 129.1743 | 292.018  | 65.9584  | 102.126  | 801.8348 | 601.0172 | 358.2877 | 570.5213 | 609.4968 | 510.3866 | 0.419771 | 0.118886 | 0.929596124  |
| Q9CY64 BIEA_MOUSE  | 35.30207 | 172.9422 | 71.2822  | 61.12447 | 30.84465 | 47.15318 | 250.5621 | 195.9047 | 215.275  | 77.70928 | 0.419771 | 0.11937  | 1.082293026  |
| A2ASQ1 AGRIN_MOUSE | 617.0666 | 92.77586 | 519.1037 | 898.7066 | 190.6063 | 102.1971 | 186.7859 | 291.1112 | 227.1196 | 218.2521 | 0.426067 | 0.121963 | -1.176762236 |
| Q9CYD3 CRTAP_MOUSE | 474.6751 | 75.30238 | 3122.881 | 1775.036 | 79.1453  | 83.01924 | 78.2571  | 85.56043 | 120.4205 | 77.31853 | 0.428387 | 0.124826 | -3.636005683 |
| Q80X19 COEA1_MOUSE | 119.7368 | 171.8006 | 162.4776 | 149.5265 | 407.4968 | 41.29165 | 105.8841 | 50.45893 | 203.6843 | 100.0776 | 0.428387 | 0.125289 | -1.011813316 |
| P45700 MA1A1_MOUSE | 1337.462 | 586.23   | 1132.008 | 944.139  | 54.53782 | 1124.901 | 1511.412 | 1731.003 | 1293.781 | 777.5506 | 0.428387 | 0.125507 | 0.667277524  |
| Q8BFZ3 ACTBL_MOUSE | 108.9277 | 203.0236 | 151.5825 | 179.4193 | 174.2803 | 722.6318 | 299.6708 | 212.4645 | 154.3178 | 293.5352 | 0.428387 | 0.12646  | 1.041889561  |
| Q8VDD5 MYH9_MOUSE  | 1472.2   | 1677.867 | 313.1812 | 610.1466 | 1826.353 | 2342.799 | 1551.729 | 1180.856 | 1905.844 | 1993.488 | 0.428387 | 0.127417 | 0.605213147  |
| Q9DCG6 PBLD1_MOUSE | 219.953  | 429.6545 | 740.7175 | 219.588  | 442.6237 | 68.9084  | 278.412  | 193.7523 | 63.09493 | 438.8224 | 0.428387 | 0.127467 | -0.976682572 |
| Q9CWJ9 PUR9_MOUSE  | 308.4728 | 465.3711 | 512.0755 | 285.6696 | 549.7491 | 438.2051 | 656.6113 | 380.515  | 665.3042 | 701.3994 | 0.430149 | 0.128802 | 0.421949646  |
| Q91Y97 ALDOB_MOUSE | 455.2206 | 969.5757 | 640.0361 | 783.9737 | 326.6023 | 237.2052 | 445.728  | 513.2944 | 479.481  | 468.0574 | 0.451225 | 0.135962 | -0.56679466  |
| P13595 NCAM1_MOUSE | 114.6223 | 341.0603 | 753.1076 | 556.445  | 406.3105 | 120.7952 | 255.8858 | 99.74631 | 52.97839 | 519.0949 | 0.453712 | 0.137566 | -1.050394678 |
| P24270 CATA_MOUSE  | 212.741  | 197.1965 | 718.2479 | 178.7292 | 292.6168 | 74.62589 | 117.2387 | 66.6953  | 132.2278 | 304.665  | 0.457957 | 0.139716 | -1.201624799 |
| Q3V1G4 OLM2B_MOUSE | 843.2122 | 741.0472 | 620.3574 | 868.9623 | 901.715  | 1009.789 | 812.2573 | 950.9755 | 759.9138 | 1106.639 | 0.463643 | 0.142408 | 0.222930726  |
| P61982 1433G_MOUSE | 387.406  | 233.186  | 300.5386 | 315.7784 | 561.5127 | 206.6275 | 593.5647 | 457.5192 | 708.209  | 753.4933 | 0.463643 | 0.143197 | 0.596564242  |
| P80313 TCPH_MOUSE  | 290.9678 | 504.006  | 266.023  | 381.1809 | 477.1982 | 492.022  | 870.8799 | 731.256  | 547.228  | 234.5514 | 0.467634 | 0.14531  | 0.583394913  |
| Q60715 P4HA1_MOUSE | 184.681  | 226.0297 | 90.38268 | 115.8139 | 165.509  | 108.163  | 133.862  | 488.6049 | 343.5078 | 943.7059 | 0.46837  | 0.147286 | 1.36680621   |

|                    |          |          |          |          |          |          |          |          |          |          |          |          |              |
|--------------------|----------|----------|----------|----------|----------|----------|----------|----------|----------|----------|----------|----------|--------------|
| Q9Z1T2 TSP4_MOUSE  | 15031.64 | 10960.13 | 10357.54 | 16683.59 | 6017.003 | 18951.55 | 13494.39 | 18472.72 | 14930.79 | 11893.96 | 0.46837  | 0.147303 | 0.396785827  |
| Q8BP47 SYNC_MOUSE  | 215.9512 | 302.3589 | 66.5569  | 267.3767 | 227.5315 | 84.18607 | 140.2005 | 137.8725 | 107.1897 | 230.8279 | 0.468672 | 0.14828  | -0.624734085 |
| Q8BG32 PSD11_MOUSE | 69.01611 | 281.2269 | 157.0452 | 132.4133 | 392.9817 | 56.74841 | 132.993  | 78.82848 | 147.2546 | 133.879  | 0.470383 | 0.149708 | -0.909672298 |
| Q07456 AMBP_MOUSE  | 5537.483 | 2810.055 | 5130.459 | 4568.276 | 2163.223 | 19853.93 | 4944.865 | 12959.55 | 4774.647 | 3198.847 | 0.480733 | 0.153907 | 1.178165612  |
| P29268 CCN2_MOUSE  | 41.32014 | 192.5515 | 242.9597 | 161.1281 | 116.0486 | 200.5239 | 257.7171 | 154.9288 | 176.955  | 412.3335 | 0.488198 | 0.157955 | 0.673334933  |
| O70624 MYOC_MOUSE  | 94.28312 | 119.2635 | 24.99221 | 144.5396 | 471.9303 | 206.1485 | 938.5778 | 310.5611 | 845.1862 | 56.50506 | 0.488198 | 0.158827 | 1.462927612  |
| Q9QZF2 GPC1_MOUSE  | 763.699  | 178.7259 | 1090.334 | 995.0826 | 534.9031 | 1494.24  | 888.6552 | 1494.381 | 1051.046 | 536.4214 | 0.488198 | 0.161636 | 0.61716493   |
| P57780 ACTN4_MOUSE | 6518.394 | 308.0023 | 2056.848 | 3812.12  | 301.4644 | 4052.777 | 9005.738 | 6129.008 | 9980.189 | 184.3848 | 0.488198 | 0.161805 | 1.175304079  |
| P04104 K2C1_MOUSE  | 3546.103 | 566.4563 | 2758.934 | 11573.36 | 5678.813 | 30201.05 | 98914.48 | 22405.78 | 2824.324 | 5362.255 | 0.488198 | 0.16221  | 2.72691454   |
| Q9CZD3 GARS_MOUSE  | 90.15656 | 389.241  | 62.33427 | 81.44246 | 686.376  | 62.39264 | 44.64804 | 115.911  | 78.46751 | 64.48213 | 0.488198 | 0.162596 | -1.83954486  |
| Q9R118 HTRA1_MOUSE | 911.2445 | 392.9625 | 454.733  | 546.9205 | 238.0365 | 736.7365 | 620.2371 | 921.2852 | 884.9218 | 463.4057 | 0.488198 | 0.162733 | 0.511571972  |
| P06684 CO5_MOUSE   | 365.9135 | 585.0187 | 486.5309 | 233.565  | 211.1795 | 86.1429  | 106.7686 | 347.1873 | 419.6656 | 179.045  | 0.489868 | 0.167254 | -0.724899465 |
| P62869 ELOB_MOUSE  | 5220.93  | 118.7059 | 31.98711 | 203.5831 | 97.58801 | 2884.463 | 3735.107 | 4257.396 | 4759.533 | 44.98821 | 0.489868 | 0.167387 | 1.466931082  |
| P28654 PGS2_MOUSE  | 4185.561 | 228.5052 | 6272.813 | 3658.238 | 378.6242 | 610.6823 | 1929.557 | 852.9485 | 1972.215 | 98.79099 | 0.489868 | 0.167953 | -1.430063531 |
| Q9Z1Z2 STRAP_MOUSE | 53.1703  | 126.5984 | 48.17102 | 37.8194  | 142.7775 | 52.73327 | 107.9507 | 189.467  | 141.8052 | 159.9645 | 0.489868 | 0.168169 | 0.674230804  |
| Q9D6X6 PRS23_MOUSE | 463.2709 | 825.0679 | 477.9124 | 535.2239 | 1216.906 | 307.6154 | 288.004  | 556.9171 | 305.3811 | 762.5458 | 0.489868 | 0.169675 | -0.664051253 |
| P97464 EXT1_MOUSE  | 757.133  | 471.8042 | 867.2827 | 598.1271 | 810.204  | 443.9381 | 218.2574 | 450.8226 | 632.7367 | 821.6584 | 0.489868 | 0.171208 | -0.448914085 |
| P02535 K1C10_MOUSE | 16693.57 | 2054.294 | 7083.897 | 8890.506 | 1450.46  | 34249.38 | 103648.4 | 26017.88 | 7879.345 | 2377.293 | 0.489868 | 0.171296 | 2.267540396  |
| E9PV24 FIBA_MOUSE  | 3742.619 | 3403.608 | 5214.853 | 2783.786 | 2186.453 | 1860.996 | 3677.429 | 2353.052 | 2862.497 | 1999.478 | 0.489868 | 0.171379 | -0.442493767 |
| P28301 LYOX_MOUSE  | 1592.524 | 1634.471 | 1086.621 | 1050.274 | 3131.288 | 698.1918 | 1024.44  | 977.9571 | 1522.13  | 1257.609 | 0.489868 | 0.172947 | -0.632381699 |
| O88783 FA5_MOUSE   | 10520.95 | 7191.415 | 10572.75 | 7616.384 | 7625.575 | 6177.749 | 10951.81 | 5800.315 | 4273.234 | 6192.26  | 0.489868 | 0.17322  | -0.382265036 |
| Q8CBR6 TSK_MOUSE   | 44.31166 | 131.0871 | 61.23166 | 99.27726 | 289.6118 | 50.57431 | 383.1112 | 251.6814 | 140.7099 | 408.4431 | 0.489868 | 0.173437 | 0.980823248  |
| Q9R1P0 PSA4_MOUSE  | 62.08234 | 183.7387 | 76.68372 | 145.3725 | 414.7095 | 49.76188 | 166.3996 | 39.47503 | 58.53431 | 67.43901 | 0.496073 | 0.176568 | -1.209639679 |
| Q92111 TRFE_MOUSE  | 593.0146 | 836.2208 | 590.6747 | 2072.756 | 772.0661 | 97.76183 | 232.278  | 874.5551 | 245.2807 | 968.1447 | 0.501564 | 0.1797   | -1.008533965 |
| P40224 SDF1_MOUSE  | 467.2399 | 253.5526 | 221.5671 | 194.0302 | 305.0238 | 461.2323 | 659.6245 | 255.5194 | 471.4812 | 254.9818 | 0.501564 | 0.18088  | 0.544854216  |
| O08709 PRDX6_MOUSE | 213.771  | 853.0433 | 456.8707 | 332.9435 | 627.8016 | 534.7225 | 667.8576 | 530.6473 | 788.5921 | 1020.868 | 0.501564 | 0.182315 | 0.51192915   |
| Q99LH1 NOG2_MOUSE  | 51.224   | 71.27798 | 130.1839 | 103.9307 | 37.64574 | 141.0936 | 104.7487 | 176.9709 | 108.0758 | 690.92   | 0.501564 | 0.183512 | 1.631791045  |
| Q9Z0G4 CCN5_MOUSE  | 332.7441 | 379.0787 | 654.8024 | 513.2662 | 124.5756 | 257.7802 | 249.4225 | 247.3885 | 409.3649 | 102.0876 | 0.501564 | 0.183575 | -0.662891398 |
| Q922D8 C1TC_MOUSE  | 61.0405  | 187.3373 | 267.0179 | 188.6321 | 142.8224 | 73.42329 | 204.1203 | 454.1925 | 244.1242 | 656.5114 | 0.501564 | 0.18419  | 0.946790798  |
| Q99PT1 GDIR1_MOUSE | 429.4648 | 652.579  | 641.4489 | 468.004  | 962.1752 | 222.2531 | 565.5137 | 647.1204 | 504.3413 | 337.2244 | 0.506005 | 0.187932 | -0.470244973 |
| P97798 NEO1_MOUSE  | 337.3923 | 790.7951 | 287.3098 | 356.5789 | 401.2659 | 366.5527 | 215.6692 | 402.0408 | 330.0615 | 83.7699  | 0.506005 | 0.188578 | -0.636453734 |
| Q9QXD6 F16P1_MOUSE | 199.0927 | 441.2799 | 547.2388 | 461.6409 | 766.4601 | 72.97023 | 575.0941 | 456.7883 | 213.5319 | 147.4687 | 0.506005 | 0.18868  | -0.720708056 |
| O88342 WDR1_MOUSE  | 5664.927 | 1699.993 | 4814.115 | 3989.797 | 1947.01  | 2409.271 | 3994.109 | 2101.52  | 1753.37  | 1414.939 | 0.507366 | 0.190449 | -0.63405056  |
| P42932 TCPQ_MOUSE  | 4660.501 | 258.3159 | 1839.4   | 1379.127 | 245.1108 | 1310.558 | 171.9551 | 396.1101 | 214.6536 | 321.9082 | 0.507366 | 0.191098 | -1.79523894  |

|                    |          |          |          |          |          |          |          |          |          |          |          |          |              |
|--------------------|----------|----------|----------|----------|----------|----------|----------|----------|----------|----------|----------|----------|--------------|
| O55131 SEPT7_MOUSE | 125.6603 | 272.7306 | 79.1397  | 123.0617 | 259.3999 | 81.14419 | 152.4397 | 82.7395  | 126.9983 | 121.9902 | 0.511793 | 0.194894 | -0.60527654  |
| Q07797 LG3BP_MOUSE | 2361.005 | 7706.847 | 3355.449 | 3337.601 | 13743.95 | 2281.82  | 2445.146 | 3320.866 | 3357.549 | 3961.564 | 0.511793 | 0.195987 | -0.989208404 |
| Q9CYT6 CAP2_MOUSE  | 10914.33 | 269.6315 | 12794.05 | 10389.45 | 28.24384 | 3578.747 | 4092.771 | 3947.371 | 2120.401 | 498.5675 | 0.511793 | 0.196267 | -1.272496403 |
| P50446 K2C6A_MOUSE | 59.55566 | 83.76015 | 348.3142 | 300.8876 | 254.9555 | 1141.896 | 1659.119 | 233.89   | 216.853  | 49.81683 | 0.511793 | 0.196621 | 1.656240873  |
| P11438 LAMP1_MOUSE | 52.46194 | 67.54339 | 62.52047 | 163.9165 | 207.9953 | 116.8225 | 43.58049 | 279.8085 | 220.5669 | 585.476  | 0.512419 | 0.198214 | 1.168501683  |
| Q61316 HSP74_MOUSE | 304.3827 | 100.7918 | 2426.343 | 2417.004 | 214.3018 | 1064.61  | 109.9312 | 95.63361 | 106.8096 | 38.67153 | 0.512419 | 0.198791 | -1.948176007 |
| Q9ES30 C1QT3_MOUSE | 2388.336 | 2188.921 | 1264.866 | 1776.508 | 2322.465 | 787.7497 | 1240.464 | 1206.524 | 1616.486 | 2551.146 | 0.515469 | 0.201134 | -0.425417678 |
| Q60841 RELN_MOUSE  | 536.458  | 2973.284 | 1087.493 | 501.1156 | 242.9424 | 277.0844 | 480.9032 | 498.1494 | 477.3799 | 123.644  | 0.515469 | 0.201916 | -1.524090067 |
| P31938 MP2K1_MOUSE | 216.6068 | 434.0363 | 296.4828 | 169.308  | 182.407  | 246.6896 | 256.0388 | 249.007  | 624.7735 | 695.3903 | 0.520787 | 0.205307 | 0.673729091  |
| Q61753 SERA_MOUSE  | 878.4688 | 1123.389 | 576.8909 | 545.9792 | 661.4443 | 420.7714 | 1263.527 | 1197.419 | 1259.161 | 973.0248 | 0.520787 | 0.205961 | 0.433684891  |
| Q9QYB1 CLIC4_MOUSE | 340.7398 | 597.343  | 786.9035 | 576.1031 | 508.216  | 331.4056 | 169.2752 | 725.4274 | 352.7072 | 432.3867 | 0.522213 | 0.207509 | -0.4821554   |
| P59999 ARPC4_MOUSE | 150.6822 | 58.19016 | 100.8924 | 101.2265 | 131.7255 | 35.0155  | 91.69242 | 41.17841 | 74.28464 | 135.5598 | 0.522772 | 0.208715 | -0.522841267 |
| P70695 F16P2_MOUSE | 242.3551 | 564.29   | 475.2167 | 249.8764 | 212.9726 | 24.20174 | 102.3014 | 198.9503 | 499.1641 | 190.3372 | 0.528833 | 0.212382 | -0.781572685 |
| Q9JM99 PRG4_MOUSE  | 1580.331 | 2316.326 | 1880.378 | 2210.313 | 2594.731 | 1894.003 | 1868.626 | 1232.555 | 2096.467 | 1934.214 | 0.528833 | 0.213754 | -0.229485948 |
| Q61414 K1C15_MOUSE | 1435.159 | 77.40528 | 862.9189 | 2029.899 | 663.3245 | 8865.009 | 54589.98 | 8049.583 | 914.0952 | 932.0886 | 0.528833 | 0.214443 | 3.855122342  |
| P28665 MUG1_MOUSE  | 27503.67 | 5598.482 | 45367.54 | 37569.55 | 433.102  | 19763.89 | 16383.43 | 11737.67 | 4319.5   | 295.0873 | 0.528833 | 0.215391 | -1.149609838 |
| Q8VHY0 CSPG4_MOUSE | 145.7911 | 241.784  | 142.3851 | 135.1143 | 263.267  | 52.72692 | 116.9619 | 232.1308 | 83.37954 | 162.3138 | 0.528833 | 0.216114 | -0.519746484 |
| P47199 QOR_MOUSE   | 1925.127 | 223.3762 | 138.5093 | 680.0479 | 380.8989 | 605.5726 | 202.5713 | 75.21635 | 48.19715 | 123.3788 | 0.529736 | 0.217658 | -1.666126181 |
| Q9R087 GPC6_MOUSE  | 56.30665 | 59.96418 | 28.15144 | 91.92339 | 310.5358 | 231.1367 | 121.81   | 105.7327 | 244.0638 | 244.7287 | 0.529736 | 0.218479 | 0.792855157  |
| P11087 CO1A1_MOUSE | 51728.42 | 38287.41 | 12472.95 | 14960.82 | 24540.79 | 149763.9 | 82278.07 | 32480.67 | 19529.29 | 27680.85 | 0.531443 | 0.220611 | 1.134516613  |
| Q9CXD6 MCUR1_MOUSE | 1612.503 | 549.7833 | 1103.146 | 918.503  | 78.18582 | 974.605  | 387.3037 | 194.2465 | 414.5749 | 364.2238 | 0.531443 | 0.221184 | -0.868177583 |
| P16627 HS71L_MOUSE | 378.666  | 348.421  | 682.0803 | 446.8042 | 868.5297 | 414.5035 | 271.0078 | 211.7841 | 405.3484 | 619.2396 | 0.538965 | 0.22533  | -0.503471307 |
| P02463 CO4A1_MOUSE | 2398.303 | 1131.911 | 1590.246 | 1892.56  | 627.6498 | 1129.976 | 648.3232 | 1529.63  | 954.5159 | 1171.463 | 0.5409   | 0.227158 | -0.491709123 |
| Q6ZQ38 CAND1_MOUSE | 414.9288 | 272.7024 | 278.9105 | 521.7897 | 372.6259 | 46.77932 | 202.0878 | 275.4479 | 102.7015 | 567.3635 | 0.541194 | 0.2283   | -0.639782997 |
| P19788 MGP_MOUSE   | 803.1805 | 469.7303 | 761.6533 | 826.6382 | 140.2139 | 395.523  | 673.8802 | 465.0302 | 238.5486 | 213.5012 | 0.541933 | 0.229633 | -0.595426759 |
| P23506 PIMT_MOUSE  | 67.7049  | 169.2407 | 163.5853 | 100.0618 | 602.7327 | 112.8213 | 105.4735 | 59.06974 | 95.10397 | 97.5806  | 0.544386 | 0.231697 | -1.230974714 |
| P11276 FINC_MOUSE  | 9588.256 | 9319.381 | 7402.939 | 8578.305 | 9054.977 | 16960.97 | 8953.443 | 8158.576 | 8914.743 | 11584.16 | 0.552698 | 0.237384 | 0.31249641   |
| P14211 CALR_MOUSE  | 160.5302 | 346.4864 | 80.78407 | 82.57799 | 199.0394 | 63.5711  | 288.1713 | 170.4978 | 416.515  | 671.656  | 0.552698 | 0.237672 | 0.889307074  |
| P28474 ADHX_MOUSE  | 553.3193 | 1343.525 | 447.6658 | 351.8141 | 1079.037 | 172.1974 | 810.6013 | 243.9868 | 467.5813 | 635.7375 | 0.552698 | 0.238986 | -0.69622032  |
| P70697 DCUP_MOUSE  | 333.9781 | 536.3433 | 123.5727 | 546.261  | 106.8935 | 28.79298 | 328.699  | 192.503  | 315.0691 | 57.18393 | 0.552698 | 0.239398 | -0.836656472 |
| P08113 ENPL_MOUSE  | 415.6556 | 546.0375 | 374.8958 | 353.4408 | 232.1393 | 410.6324 | 736.0403 | 543.0338 | 321.8241 | 459.607  | 0.553229 | 0.24067  | 0.362440285  |
| Q6P8X1 SNX6_MOUSE  | 92.63423 | 120.4923 | 111.4808 | 98.65521 | 365.4455 | 52.50596 | 503.7165 | 296.876  | 327.9964 | 183.2944 | 0.559216 | 0.244328 | 0.790691879  |
| Q3TTY5 K22E_MOUSE  | 759.3494 | 101.633  | 327.6259 | 724.2538 | 23.97033 | 2298.291 | 12659.41 | 1517.654 | 190.3783 | 89.99393 | 0.559723 | 0.24619  | 3.112883434  |
| O88322 NID2_MOUSE  | 382.0505 | 645.7775 | 443.8929 | 454.1062 | 206.4948 | 309.3242 | 606.5502 | 433.4265 | 824.067  | 673.5777 | 0.559723 | 0.247676 | 0.416989688  |

|                    |          |          |          |          |          |          |          |          |          |          |          |          |              |
|--------------------|----------|----------|----------|----------|----------|----------|----------|----------|----------|----------|----------|----------|--------------|
| Q61598 GDIB_MOUSE  | 589.1381 | 1218.24  | 626.952  | 526.6042 | 1656.543 | 220.6437 | 774.7289 | 656.6048 | 669.014  | 778.1453 | 0.559723 | 0.24906  | -0.575238588 |
| P10630 IF4A2_MOUSE | 102.6108 | 699.6501 | 118.6495 | 307.7724 | 250.594  | 68.00034 | 234.5723 | 120.0539 | 208.5966 | 153.8631 | 0.559723 | 0.251179 | -0.913968794 |
| P45591 COF2_MOUSE  | 58.09801 | 159.8357 | 200.8733 | 130.6261 | 151.3344 | 100.3718 | 169.4938 | 347.3666 | 200.2784 | 173.6466 | 0.559723 | 0.252093 | 0.500178174  |
| Q9DC11 PXDC2_MOUSE | 98.7738  | 293.8421 | 158.2343 | 111.8938 | 371.2665 | 64.12062 | 143.9115 | 169.0469 | 166.999  | 138.7447 | 0.559723 | 0.252742 | -0.598667601 |
| P62259 1433E_MOUSE | 1620.595 | 684.6674 | 3423.908 | 2657.47  | 1174.557 | 465.5553 | 1855.14  | 1487.892 | 1391.714 | 956.8052 | 0.559723 | 0.253341 | -0.634938907 |
| Q9ET01 PYGL_MOUSE  | 1020.596 | 1619.076 | 1602.412 | 1116.149 | 3169.795 | 698.9463 | 1401.612 | 1100.839 | 1468.971 | 1331.578 | 0.559723 | 0.253357 | -0.50678159  |
| P48774 GSTM5_MOUSE | 868.8747 | 859.7949 | 174.9452 | 382.8286 | 484.4606 | 172.914  | 431.0392 | 417.5562 | 397.2786 | 457.8708 | 0.559723 | 0.254036 | -0.562190211 |
| Q6P8M1 TATD1_MOUSE | 206.3066 | 464.2141 | 188.0472 | 107.117  | 683.52   | 140.2329 | 847.1204 | 203.1504 | 866.9922 | 785.603  | 0.559798 | 0.255124 | 0.785693762  |
| Q9D0F9 PGM1_MOUSE  | 13105.53 | 2323.3   | 1421.135 | 1240.367 | 1188.373 | 1954.116 | 918.837  | 734.8991 | 705.5468 | 702.7946 | 0.56036  | 0.256436 | -1.94234341  |
| P13707 GPDA_MOUSE  | 94.65261 | 171.1625 | 38.76601 | 124.9366 | 239.1369 | 67.22504 | 105.1065 | 103.6888 | 113.82   | 63.41229 | 0.567377 | 0.260716 | -0.560945542 |
| Q9JM58 CRLF1_MOUSE | 64.32691 | 294.3882 | 120.2628 | 99.18726 | 301.3271 | 30.18037 | 367.5676 | 128.1283 | 466.0413 | 569.6375 | 0.571665 | 0.263763 | 0.828240697  |
| P39061 COIA1_MOUSE | 5356.378 | 187.1594 | 1097.771 | 1885.784 | 273.9156 | 2395.939 | 3467.038 | 2850.496 | 2838.881 | 2999.669 | 0.578249 | 0.26789  | 0.725479037  |
| Q76KF0 SEM6D_MOUSE | 1248.215 | 30.48862 | 6892.623 | 3978.066 | 26.14796 | 181.3339 | 933.4669 | 904.9561 | 830.3834 | 1379.901 | 0.580707 | 0.270122 | -1.525241975 |
| P98063 BMP1_MOUSE  | 23757.36 | 296.5703 | 3753.47  | 922.0687 | 555.2369 | 16355.52 | 27431.76 | 29388.11 | 1075.061 | 96.78185 | 0.590588 | 0.27583  | 1.344131674  |
| O09061 PSB1_MOUSE  | 139.0331 | 181.2245 | 192.3011 | 235.2406 | 82.43926 | 62.8775  | 77.15352 | 139.9868 | 150.601  | 193.3493 | 0.592857 | 0.278006 | -0.412053667 |
| Q80VA0 GALT7_MOUSE | 154.4636 | 284.2327 | 254.668  | 191.3337 | 330.7406 | 80.28265 | 347.9516 | 238.2655 | 93.72894 | 100.4376 | 0.594566 | 0.280157 | -0.497951018 |
| Q8BK62 OLFL3_MOUSE | 914.6667 | 873.2858 | 970.6782 | 541.4496 | 928.3    | 472.4158 | 559.0344 | 749.4203 | 1104.238 | 545.9071 | 0.594566 | 0.281164 | -0.30146954  |
| Q61982 NOTC3_MOUSE | 54.43093 | 231.5928 | 192.1915 | 263.8275 | 88.02789 | 123.112  | 292.4956 | 195.7244 | 185.6417 | 391.0662 | 0.594566 | 0.282484 | 0.517277172  |
| Q91WG8 GLCNE_MOUSE | 452.636  | 51.14671 | 30.65352 | 436.8168 | 78.20076 | 115.8834 | 236.8478 | 1038.712 | 452.8649 | 287.3832 | 0.594566 | 0.284583 | 1.022359659  |
| Q61166 MARE1_MOUSE | 130.3762 | 191.5033 | 132.4718 | 177.7656 | 80.70967 | 132.2405 | 225.4221 | 136.4372 | 302.0829 | 139.4583 | 0.594566 | 0.284949 | 0.392404031  |
| P20029 BIP_MOUSE   | 116.2404 | 298.1429 | 123.4448 | 1487.122 | 650.2433 | 317.7692 | 185.3747 | 343.6085 | 237.3836 | 101.0877 | 0.594566 | 0.286132 | -1.174483842 |
| Q6ZWX6 IF2A_MOUSE  | 59.54678 | 77.61607 | 139.4354 | 197.5675 | 54.56413 | 165.6051 | 5958.333 | 377.7002 | 384.5531 | 145.0835 | 0.594566 | 0.286746 | 3.733183614  |
| Q5SUR0 PUR4_MOUSE  | 269.154  | 322.7213 | 119.0004 | 284.3954 | 289.3773 | 884.236  | 309.7782 | 501.6586 | 134.773  | 234.1379 | 0.594566 | 0.287765 | 0.684477281  |
| P28653 PGS1_MOUSE  | 76590.42 | 102333.1 | 76931.3  | 91367.97 | 133577.5 | 146522.3 | 90267.33 | 117357.6 | 90146.18 | 121176.3 | 0.596375 | 0.289764 | 0.234011529  |
| Q8BND5 QSOX1_MOUSE | 133.627  | 253.9231 | 496.7789 | 223.2153 | 59.94207 | 60.57229 | 222.6373 | 173.1859 | 106.8547 | 158.2452 | 0.600339 | 0.292821 | -0.69434364  |
| Q3V0K9 PLSI_MOUSE  | 3587.133 | 9091.658 | 14391.88 | 11119.86 | 6815.019 | 5007.743 | 2743.989 | 5542.845 | 5212.419 | 12578.84 | 0.601189 | 0.294367 | -0.533845489 |
| P17751 TPIS_MOUSE  | 3653.088 | 770.6334 | 1158.919 | 2131.353 | 1758.021 | 3441.171 | 8573.63  | 3413.665 | 1186.392 | 996.614  | 0.601567 | 0.295685 | 0.894772396  |
| P68368 TBA4A_MOUSE | 5430.872 | 7738.602 | 5438.694 | 4662.621 | 10870.3  | 4105.589 | 4399.309 | 5259.735 | 7267.466 | 6066.557 | 0.606974 | 0.300393 | -0.333287613 |
| O08553 DPYL2_MOUSE | 539.7326 | 317.2694 | 371.3221 | 273.0934 | 622.0076 | 448.4808 | 207.6826 | 204.101  | 391.9932 | 402.5175 | 0.606974 | 0.30063  | -0.359758107 |
| Q7TNG5 EMAL2_MOUSE | 491.7733 | 743.6895 | 445.2697 | 579.1242 | 868.3215 | 207.8679 | 829.0776 | 736.3919 | 233.4424 | 263.8847 | 0.612991 | 0.305674 | -0.462208126 |
| O55222 ILK_MOUSE   | 1844.168 | 719.9436 | 979.1242 | 1439.929 | 1235.496 | 1836.328 | 950.5682 | 1353.385 | 1469.463 | 2142.189 | 0.612991 | 0.307112 | 0.317951933  |
| Q9EQF5 DPYS_MOUSE  | 880.9294 | 341.2417 | 138.26   | 441.7252 | 542.0432 | 837.7632 | 193.3598 | 24.3857  | 180.6695 | 59.89858 | 0.612991 | 0.308022 | -0.854944221 |
| P26039 TLN1_MOUSE  | 3493.459 | 6658.979 | 2283.484 | 2494.233 | 4812.093 | 9639.018 | 4382.735 | 10492.29 | 3455.342 | 2045.362 | 0.612991 | 0.30836  | 0.60438509   |
| Q01149 CO1A2_MOUSE | 17961.41 | 13718.19 | 14322.71 | 15576.72 | 16849.61 | 26656.04 | 13126.25 | 13463.74 | 17156.06 | 23099.09 | 0.612991 | 0.311588 | 0.253604449  |



|                    |          |          |          |          |          |          |          |          |          |          |          |          |              |
|--------------------|----------|----------|----------|----------|----------|----------|----------|----------|----------|----------|----------|----------|--------------|
| Q921V5 MGAT2_MOUSE | 192.8301 | 370.0724 | 223.7953 | 97.7934  | 324.6445 | 101.9529 | 295.0499 | 322.5484 | 396.7441 | 597.1469 | 0.612991 | 0.312456 | 0.502921225  |
| Q9Z2K1 K1C16_MOUSE | 53.53446 | 151.2045 | 199.6413 | 1043.488 | 83.16177 | 488.918  | 5150.03  | 305.1791 | 455.9607 | 345.2066 | 0.612991 | 0.313159 | 2.139378506  |
| P60843 IF4A1_MOUSE | 212.0281 | 392.635  | 356.8255 | 515.0212 | 827.1008 | 1233.366 | 406.5407 | 1076.826 | 522.3726 | 245.9671 | 0.612991 | 0.313351 | 0.597291646  |
| P51885 LUM_MOUSE   | 16263    | 19203.35 | 17257.11 | 13595    | 15234.93 | 17700.5  | 16656.66 | 13655.48 | 14728.57 | 10040.65 | 0.612991 | 0.313999 | -0.164165953 |
| Q6P1B1 XPP1_MOUSE  | 124.502  | 298.2344 | 123.7007 | 133.5443 | 448.9915 | 40.03573 | 257.6051 | 109.8409 | 127.5623 | 195.4949 | 0.618722 | 0.3181   | -0.627977867 |
| P53994 RAB2A_MOUSE | 70.73374 | 137.7686 | 104.0897 | 62.25301 | 177.4491 | 25.79198 | 201.1512 | 98.53161 | 225.3726 | 256.3907 | 0.619624 | 0.319784 | 0.547557542  |
| P62242 RS8_MOUSE   | 303.5896 | 328.3092 | 346.1332 | 413.6767 | 327.5027 | 325.3559 | 384.844  | 265.0669 | 454.3417 | 1141.06  | 0.619624 | 0.320897 | 0.580396383  |
| Q8BH35 CO8B_MOUSE  | 7528.253 | 1876.984 | 8000.771 | 6447.733 | 545.3241 | 3159.995 | 4415.305 | 4080.679 | 3255.387 | 699.1948 | 0.619833 | 0.322173 | -0.644303498 |
| Q922U2 K2C5_MOUSE  | 527.7365 | 208.1738 | 316.7438 | 385.2705 | 133.3648 | 291.0977 | 3200.184 | 626.0845 | 139.3073 | 350.1893 | 0.622031 | 0.325196 | 1.551835573  |
| P68040 RACK1_MOUSE | 553.6373 | 268.9714 | 228.2067 | 181.4305 | 311.839  | 141.871  | 336.3934 | 227.4651 | 266.9387 | 189.7141 | 0.622031 | 0.325658 | -0.409667405 |
| P70389 ALS_MOUSE   | 3379.857 | 3019.233 | 3219.39  | 2945.446 | 2136.26  | 2856.078 | 3085.117 | 4060.599 | 2741.573 | 3669.494 | 0.63022  | 0.331132 | 0.158992156  |
| P11152 LIPL_MOUSE  | 988.0441 | 1108.155 | 1186.969 | 737.4551 | 3466.656 | 779.8352 | 1012.156 | 1268.826 | 983.8499 | 835.5979 | 0.630347 | 0.332387 | -0.617482059 |
| Q9QWR8 NAGAB_MOUSE | 4863.033 | 556.7555 | 651.2673 | 2568.582 | 69.65259 | 145.6376 | 146.1387 | 1846.09  | 500.6214 | 1203.116 | 0.631143 | 0.334981 | -1.180846505 |
| Q99MV7 RNF17_MOUSE | 105.832  | 250.1688 | 189.6871 | 149.0993 | 515.712  | 72.73203 | 130.6717 | 109.034  | 217.3589 | 267.5257 | 0.631143 | 0.336797 | -0.602367119 |
| Q91YN5 UAP1_MOUSE  | 152.2484 | 414.7167 | 149.502  | 142.9317 | 174.5646 | 67.59837 | 92.43654 | 268.4865 | 181.3752 | 97.08313 | 0.631143 | 0.337443 | -0.548444283 |
| Q02257 PLAK_MOUSE  | 118.0846 | 61.06813 | 88.7533  | 43.73684 | 42.6173  | 69.65437 | 697.9116 | 127.0113 | 48.17325 | 53.31987 | 0.631143 | 0.339181 | 1.49143827   |
| P30416 FKBP4_MOUSE | 1371.551 | 465.9866 | 697.6656 | 720.3041 | 468.0387 | 792.5636 | 977.2842 | 1953.694 | 1497.637 | 224.5764 | 0.631143 | 0.340708 | 0.548455218  |
| P35235 PTN11_MOUSE | 98.69908 | 328.0671 | 75.67413 | 137.9975 | 319.7731 | 39.6372  | 213.863  | 47.86377 | 96.82491 | 220.6895 | 0.631143 | 0.341315 | -0.633695454 |
| Q80X90 FLNB_MOUSE  | 1629.251 | 133.4313 | 129.9753 | 145.219  | 165.5366 | 53.02663 | 158.8003 | 229.9233 | 124.6358 | 129.2942 | 0.631143 | 0.342092 | -1.663243779 |
| P35441 TSP1_MOUSE  | 31403.98 | 32968.63 | 33445.23 | 31020.12 | 43353.47 | 37873.77 | 34721.15 | 33830.27 | 34192.46 | 54603.45 | 0.631143 | 0.342315 | 0.181095713  |
| Q8R366 IGSF8_MOUSE | 116.5008 | 216.0105 | 309.3335 | 258.6873 | 532.4267 | 122.6089 | 101.6408 | 370.5514 | 855.1041 | 949.8564 | 0.63244  | 0.344209 | 0.743893984  |
| Q8K157 GALM_MOUSE  | 371.2962 | 1484.78  | 2029.836 | 1355.745 | 938.244  | 679.3248 | 2189.233 | 1817.211 | 1879.7   | 1508.143 | 0.634838 | 0.34671  | 0.385630367  |
| Q9R0P5 DEST_MOUSE  | 34.72974 | 372.1178 | 3897.711 | 436.1186 | 253.4478 | 58.24275 | 363.1897 | 240.2508 | 302.9294 | 414.9834 | 0.641192 | 0.351388 | -1.855985931 |
| Q9JKF1 IQGA1_MOUSE | 953.4111 | 335.9268 | 1496.71  | 846.136  | 146.2352 | 366.741  | 604.8604 | 1083.239 | 120.6719 | 140.0087 | 0.646296 | 0.355402 | -0.706445958 |
| Q8K262 PLAC9_MOUSE | 82.0404  | 94.77113 | 41.91776 | 86.302   | 76.35577 | 39.73786 | 57.81021 | 153.4043 | 154.3118 | 99.29091 | 0.648434 | 0.359879 | 0.403755799  |
| P59900 EMIL3_MOUSE | 850.7889 | 468.5326 | 239.0786 | 134.9425 | 720.4778 | 310.6364 | 653.5872 | 710.996  | 803.9266 | 713.7197 | 0.648434 | 0.36155  | 0.403533556  |
| P18760 COF1_MOUSE  | 597.9506 | 668.9598 | 611.5578 | 388.0946 | 1102.938 | 716.4541 | 749.9358 | 1134.225 | 999.0519 | 536.2906 | 0.648434 | 0.361641 | 0.295686754  |
| P08122 CO4A2_MOUSE | 21713.15 | 22450.9  | 26191.09 | 28166.77 | 33927.38 | 32289.36 | 32927.69 | 26531.12 | 29173.41 | 24668.41 | 0.648434 | 0.36291  | 0.136471089  |
| Q923D2 BLVRB_MOUSE | 3964.886 | 2193.137 | 3751.761 | 3258.849 | 1688.639 | 4904.913 | 4757.889 | 5739.828 | 3971.811 | 432.3935 | 0.648434 | 0.363078 | 0.41482904   |
| Q8R001 MARE2_MOUSE | 1228.837 | 433.1092 | 801.1017 | 8217.235 | 1262.616 | 1632.237 | 704.7374 | 807.1611 | 629.6223 | 1063.138 | 0.648434 | 0.363905 | -1.303999912 |
| P97351 RS3A_MOUSE  | 5236.243 | 194.6945 | 1348.985 | 7750.219 | 243.971  | 2053.365 | 2681.218 | 2014.908 | 160.0696 | 200.1923 | 0.649897 | 0.36595  | -1.055200353 |
| P24369 PPIB_MOUSE  | 255.7949 | 92.40672 | 119.1267 | 100.882  | 54.63028 | 48.51664 | 215.4761 | 77.99519 | 189.7941 | 525.0101 | 0.654516 | 0.369888 | 0.762756824  |
| Q00915 RET1_MOUSE  | 445.6593 | 570.5803 | 681.6821 | 420.2613 | 615.6902 | 256.7512 | 607.1352 | 261.7388 | 587.5037 | 571.7662 | 0.654516 | 0.372488 | -0.258818397 |
| P39876 TIMP3_MOUSE | 3204.309 | 21.62016 | 2285.797 | 2224.543 | 184.4325 | 2895.921 | 2456.433 | 4135.293 | 2234.058 | 345.7739 | 0.654516 | 0.372768 | 0.607424119  |

|                    |          |          |          |          |          |          |          |          |          |          |          |          |              |
|--------------------|----------|----------|----------|----------|----------|----------|----------|----------|----------|----------|----------|----------|--------------|
| Q9Z1Z0 USO1_MOUSE  | 478.8408 | 499.8588 | 274.2854 | 1665.911 | 453.2102 | 156.8353 | 513.5137 | 353.2338 | 694.142  | 399.1041 | 0.654516 | 0.373481 | -0.671745587 |
| Q9QUP5 HPLN1_MOUSE | 995.553  | 120.8228 | 82.07726 | 65.49706 | 30.7689  | 363.5462 | 510.7331 | 1446.721 | 114.3445 | 259.1907 | 0.659538 | 0.377588 | 1.057397654  |
| P20060 HEXB_MOUSE  | 109.8713 | 243.1106 | 197.949  | 172.7932 | 636.4321 | 320.0513 | 286.4943 | 356.9285 | 430.3041 | 418.0529 | 0.664684 | 0.381786 | 0.413675931  |
| Q9R062 GLYG_MOUSE  | 408.263  | 247.1167 | 121.0588 | 164.2879 | 134.9217 | 131.4317 | 88.07755 | 202.9956 | 201.4975 | 186.1372 | 0.665897 | 0.383737 | -0.408963864 |
| Q61282 PGCA_MOUSE  | 2553.701 | 303.8192 | 300.1138 | 459.7393 | 305.4217 | 1418.946 | 792.3601 | 1980.558 | 1080.725 | 908.5323 | 0.66596  | 0.385705 | 0.655986771  |
| Q6P5F9 XPO1_MOUSE  | 202.5562 | 212.0799 | 170.9048 | 112.6417 | 397.5847 | 45.81503 | 304.6261 | 170.2731 | 145.8008 | 138.4772 | 0.66596  | 0.386282 | -0.444894774 |
| Q9R257 HEBP1_MOUSE | 581.8239 | 181.5814 | 361.4918 | 251.1859 | 389.9022 | 234.6433 | 438.2294 | 624.3831 | 338.0852 | 586.533  | 0.666441 | 0.390199 | 0.331303804  |
| P23492 PNPH_MOUSE  | 54.0775  | 270.9768 | 101.9942 | 40.6418  | 533.9589 | 33.56222 | 103.4947 | 83.40825 | 244.1577 | 85.27724 | 0.666441 | 0.390455 | -0.865135756 |
| P28481 CO2A1_MOUSE | 205.1433 | 258.1604 | 218.9013 | 132.349  | 561.5194 | 125.051  | 33.05186 | 325.7861 | 296.8879 | 178.5903 | 0.666441 | 0.391863 | -0.52040251  |
| Q9WU78 PDC6_MOUSE  | 240.6025 | 368.0562 | 289.6084 | 198.985  | 320.1611 | 308.4598 | 278.5243 | 216.4236 | 376.7421 | 482.3949 | 0.666441 | 0.392716 | 0.230132699  |
| P47877 IBP2_MOUSE  | 69.06657 | 465.249  | 352.5489 | 174.3491 | 445.6627 | 52.67196 | 183.7684 | 218.8291 | 213.4698 | 405.767  | 0.666441 | 0.393786 | -0.487886921 |
| Q9R0E2 PLOD1_MOUSE | 10625.65 | 189.591  | 566.3311 | 741.4745 | 258.2328 | 982.2318 | 536.9573 | 336.7326 | 195.1522 | 1118.397 | 0.666441 | 0.394552 | -1.965846288 |
| P16294 FA9_MOUSE   | 956.3594 | 598.5977 | 312.6429 | 55.14888 | 541.6531 | 345.3696 | 636.6955 | 700.5587 | 900.942  | 664.7346 | 0.666441 | 0.395986 | 0.398447399  |
| P70168 IMB1_MOUSE  | 69.56668 | 428.9442 | 91.27775 | 47.09949 | 216.8773 | 60.32176 | 222.3523 | 95.17622 | 64.16286 | 65.34513 | 0.666441 | 0.396602 | -0.750834679 |
| Q7TQI3 OTUB1_MOUSE | 1794.129 | 348.9035 | 478.6202 | 954.2846 | 690.9352 | 1009.301 | 266.4471 | 1173.382 | 131.2011 | 167.9239 | 0.66725  | 0.39834  | -0.634663004 |
| P97494 GSH1_MOUSE  | 191.2668 | 180.471  | 275.3416 | 192.3533 | 407.1742 | 75.68517 | 345.8032 | 296.8726 | 129.8686 | 84.51511 | 0.669595 | 0.401478 | -0.418452531 |
| Q63870 CO7A1_MOUSE | 2323.748 | 252.0483 | 726.891  | 955.3099 | 513.4404 | 179.0205 | 186.602  | 544.8733 | 1197.784 | 846.6457 | 0.669595 | 0.402849 | -0.691301984 |
| Q03350 TSP2_MOUSE  | 1547.457 | 782.3873 | 1502.377 | 1443.488 | 758.6243 | 15754.57 | 1113.021 | 1139.456 | 531.4142 | 664.627  | 0.669595 | 0.403523 | 1.670072209  |
| Q91ZJ5 UGPA_MOUSE  | 31.01167 | 189.8143 | 79.59704 | 109.0563 | 81.26727 | 41.98721 | 196.8087 | 58.42387 | 105.1726 | 394.6366 | 0.67071  | 0.405457 | 0.699653814  |
| P16460 ASSY_MOUSE  | 1282.543 | 661.1156 | 702.8095 | 815.5622 | 720.532  | 1631.747 | 1270.04  | 587.4828 | 959.7888 | 705.2697 | 0.671543 | 0.407226 | 0.301397445  |
| A2AVA0 SVEP1_MOUSE | 4137.636 | 30035.73 | 2694.142 | 3083.412 | 1003.961 | 5607.465 | 3944.804 | 1967.629 | 3255.99  | 2220.923 | 0.672126 | 0.410946 | -1.268771419 |
| Q8CIB5 FERM2_MOUSE | 121.855  | 216.8147 | 40.19816 | 104.2456 | 236.4029 | 138.794  | 475.9986 | 55.77313 | 366.284  | 78.95728 | 0.672126 | 0.411042 | 0.632988117  |
| Q64442 DHSO_MOUSE  | 841.1385 | 551.8348 | 788.7062 | 441.9374 | 512.7151 | 1085.585 | 792.2106 | 1282.013 | 705.6766 | 163.2287 | 0.672126 | 0.412665 | 0.361240906  |
| O70475 UGDH_MOUSE  | 859.389  | 775.3001 | 540.7413 | 1215.066 | 493.2292 | 271.3881 | 1534.904 | 333.869  | 289.0785 | 238.432  | 0.672126 | 0.413928 | -0.541860082 |
| P11352 GPX1_MOUSE  | 346.3415 | 631.8378 | 308.3926 | 315.4675 | 712.5732 | 63.25172 | 313.2544 | 499.7313 | 535.7228 | 384.2278 | 0.672126 | 0.41527  | -0.365832349 |
| Q9DB05 SNAA_MOUSE  | 192.1297 | 287.1284 | 165.8888 | 164.6985 | 264.6046 | 105.7942 | 383.5158 | 511.3827 | 459.5476 | 38.44571 | 0.672126 | 0.41675  | 0.480099818  |
| Q01730 RSU1_MOUSE  | 572.329  | 1035.916 | 179.9066 | 209.9315 | 517.5814 | 239.2431 | 741.2943 | 268.4292 | 312.4889 | 165.941  | 0.672126 | 0.419546 | -0.542340555 |
| Q9JMH9 MY18A_MOUSE | 702.865  | 44.15914 | 156.3222 | 108.0033 | 130.6476 | 335.0134 | 362.4707 | 486.676  | 262.3498 | 238.7759 | 0.672126 | 0.419871 | 0.56143417   |
| P62281 RS11_MOUSE  | 2650.638 | 140.9989 | 2864.522 | 2691.133 | 79.69086 | 925.1388 | 106.442  | 2314.676 | 1639.884 | 157.4658 | 0.672126 | 0.420177 | -0.712236095 |
| P09411 PGK1_MOUSE  | 2267.994 | 5171.737 | 3852.149 | 3312.454 | 11261.71 | 3500.868 | 3426.474 | 3029.235 | 3613.648 | 5333.782 | 0.672126 | 0.421098 | -0.452367163 |
| B2RXS4 PLXB2_MOUSE | 386.5503 | 390.5119 | 300.5646 | 331.0082 | 265.2997 | 221.8304 | 235.1581 | 512.7752 | 199.6503 | 237.1852 | 0.672126 | 0.421503 | -0.251031797 |
| P21300 ALD1_MOUSE  | 5633.039 | 742.826  | 190.2916 | 783.3007 | 440.378  | 621.325  | 677.9558 | 581.8285 | 849.8423 | 752.4522 | 0.67631  | 0.4254   | -1.161095075 |
| P02469 LAMB1_MOUSE | 76974.02 | 99953.38 | 37910.09 | 39852.86 | 112494.3 | 52574.78 | 88699.27 | 94830.65 | 99907.91 | 105655.4 | 0.676684 | 0.428666 | 0.266456469  |
| Q6ZWN5 RS9_MOUSE   | 1259.674 | 304.3443 | 267.0983 | 31.35336 | 131.7114 | 20.83341 | 466.5132 | 94.99696 | 186.2592 | 256.1735 | 0.676684 | 0.430568 | -0.960487647 |

|                    |          |          |          |          |          |          |          |          |          |          |          |          |              |
|--------------------|----------|----------|----------|----------|----------|----------|----------|----------|----------|----------|----------|----------|--------------|
| P20152 VIME_MOUSE  | 52.62407 | 195.9513 | 160.5247 | 140.715  | 259.9601 | 29.38715 | 188.6796 | 97.03425 | 191.1562 | 114.3321 | 0.676684 | 0.430977 | -0.383882663 |
| Q9D8N0 EF1G_MOUSE  | 941.2151 | 771.3568 | 586.3516 | 873.1458 | 799.817  | 349.2702 | 1211.245 | 1382.216 | 623.0305 | 1282.346 | 0.676684 | 0.433416 | 0.287597294  |
| Q9JLJ2 AL9A1_MOUSE | 1670.984 | 2139.489 | 1685.781 | 1490.338 | 2488.358 | 455.9419 | 1745.226 | 1011.952 | 2147.892 | 2437.626 | 0.676684 | 0.435683 | -0.280896165 |
| O35490 BHMT1_MOUSE | 142.0988 | 862.9958 | 424.0807 | 273.0113 | 812.6121 | 150.9371 | 562.671  | 480.772  | 313.2578 | 349.3578 | 0.676684 | 0.436404 | -0.437472509 |
| Q99K41 EMIL1_MOUSE | 1807.976 | 2670.66  | 441.8663 | 587.7191 | 2437.999 | 2689.81  | 2191.532 | 1726.885 | 2330.404 | 1179.453 | 0.676684 | 0.43643  | 0.348595584  |
| Q8K479 C1QT5_MOUSE | 61.55307 | 93.73911 | 96.68052 | 227.9161 | 98.91628 | 109.1034 | 248.0924 | 131.5946 | 118.5674 | 129.062  | 0.676684 | 0.43683  | 0.347450814  |
| O88200 CLC11_MOUSE | 1969.854 | 3242.295 | 2378.973 | 1933.513 | 6057.296 | 849.4966 | 2239.99  | 2539.136 | 2528.345 | 3745.057 | 0.676684 | 0.437105 | -0.388667056 |
| P35762 CD81_MOUSE  | 959.2114 | 336.1185 | 653.0876 | 314.8229 | 1710.72  | 1191.786 | 943.7349 | 529.416  | 872.5424 | 1779.597 | 0.676798 | 0.440613 | 0.420055792  |
| P12382 PFKAL_MOUSE | 42.96112 | 388.7131 | 70.03893 | 98.55193 | 379.076  | 49.2275  | 115.576  | 227.5031 | 73.00668 | 173.8406 | 0.676798 | 0.440921 | -0.615647957 |
| Q07113 MPRI_MOUSE  | 320.9041 | 557.2224 | 505.83   | 914.6055 | 584.4374 | 251.3266 | 387.0862 | 791.4359 | 541.9623 | 368.9335 | 0.676798 | 0.441324 | -0.300603038 |
| Q91Z53 GRHPR_MOUSE | 249.0059 | 95.49637 | 88.94747 | 49.74908 | 159.2522 | 1291.942 | 120.5155 | 89.12978 | 61.57952 | 65.05045 | 0.676798 | 0.443    | 1.341634557  |
| P70122 SBDS_MOUSE  | 786.1688 | 107.3992 | 511.797  | 505.5939 | 195.2319 | 125.1399 | 1016.996 | 532.0803 | 667.3238 | 522.2849 | 0.676798 | 0.444175 | 0.443307029  |
| P54822 PUR8_MOUSE  | 54.39704 | 346.9033 | 28.52171 | 132.6176 | 32.92798 | 39.63213 | 382.2981 | 228.5042 | 292.376  | 24.03321 | 0.676798 | 0.444826 | 0.699501581  |
| P08752 GNAI2_MOUSE | 78.43196 | 187.3189 | 18.35537 | 104.0118 | 333.7153 | 61.54093 | 80.80068 | 225.5374 | 243.5223 | 481.1116 | 0.679875 | 0.448129 | 0.597912637  |
| P55264 ADK_MOUSE   | 1485.917 | 4885.91  | 2901.402 | 1592.493 | 5238.393 | 1035.113 | 2685.298 | 4022.8   | 2436.941 | 2297.764 | 0.687406 | 0.456081 | -0.368052305 |
| P52480 KPYM_MOUSE  | 4197.53  | 3137.738 | 3880.188 | 3319.564 | 2201.902 | 2386.219 | 3962.478 | 3639.656 | 2627.031 | 2195.539 | 0.687406 | 0.456827 | -0.176372663 |
| Q9R098 HGFA_MOUSE  | 979.9512 | 424.7127 | 377.7571 | 326.3417 | 129.0323 | 1940.096 | 818.9564 | 404.0055 | 390.8905 | 73.54793 | 0.687406 | 0.456976 | 0.696896399  |
| P01872 IGHM_MOUSE  | 572.2836 | 510.1395 | 176.7945 | 173.8978 | 94.79983 | 391.9342 | 272.6379 | 144.5253 | 731.0143 | 536.7685 | 0.688455 | 0.459863 | 0.442853428  |
| Q8R121 ZPI_MOUSE   | 504.2375 | 975.1942 | 611.852  | 596.0146 | 955.1743 | 2013.331 | 496.8985 | 578.4518 | 728.9867 | 960.9822 | 0.688455 | 0.460267 | 0.391685096  |
| P15327 PMGE_MOUSE  | 596.2432 | 922.9052 | 496.3412 | 432.3216 | 874.36   | 277.1961 | 1014.253 | 1129.944 | 1069.298 | 577.2787 | 0.688605 | 0.462404 | 0.292182864  |
| P50608 FMOD_MOUSE  | 2707.595 | 577.2003 | 2736.774 | 2164.077 | 818.2988 | 1662.436 | 1429.72  | 1935.873 | 1359.623 | 647.8745 | 0.688605 | 0.462961 | -0.35589901  |
| Q9DBP5 KCY_MOUSE   | 110.2618 | 290.9037 | 77.59384 | 93.67313 | 230.8888 | 103.0834 | 227.122  | 317.9677 | 156.6684 | 211.2586 | 0.691178 | 0.465992 | 0.338993657  |
| P19096 FAS_MOUSE   | 76.39553 | 341.734  | 54.88481 | 44.99751 | 122.3652 | 67.00438 | 204.4431 | 271.2135 | 278.7919 | 88.00847 | 0.69447  | 0.469519 | 0.506090889  |
| O08677 KNG1_MOUSE  | 10127.48 | 103.7344 | 2815.514 | 3568.78  | 3295.244 | 30107.2  | 5792.492 | 2713.876 | 1619.844 | 1310.947 | 0.696491 | 0.473349 | 1.061105027  |
| Q61838 PZP_MOUSE   | 13855.43 | 4991.207 | 14395.82 | 10049.96 | 1546.765 | 10074.02 | 12557.74 | 17419.62 | 11781.53 | 5051.911 | 0.696491 | 0.473509 | 0.343283692  |
| Q61292 LAMB2_MOUSE | 2633.595 | 285.6154 | 2429.666 | 1927.479 | 318.9545 | 418.4991 | 999.6085 | 1768.363 | 723.8589 | 1557.172 | 0.697919 | 0.475794 | -0.474227149 |
| Q8VCR7 ABHEB_MOUSE | 201.8968 | 425.7776 | 194.0953 | 136.3937 | 18.38978 | 77.22118 | 407.9134 | 188.7905 | 128.5631 | 627.9028 | 0.699286 | 0.478043 | 0.550639052  |
| P32261 ANT3_MOUSE  | 32488.77 | 41271.54 | 34423.55 | 30611.3  | 53944.58 | 34659.12 | 52485.73 | 34484.4  | 46284.95 | 45220.16 | 0.700388 | 0.480667 | 0.145109155  |
| P09103 PDIA1_MOUSE | 1289.081 | 109.9781 | 180.5376 | 136.2626 | 181.0137 | 233.0433 | 260.5298 | 284.0176 | 185.4734 | 82.56437 | 0.700388 | 0.481435 | -0.859252409 |
| P07742 RIR1_MOUSE  | 338.3434 | 647.1262 | 296.7322 | 309.9045 | 299.4193 | 395.1674 | 387.2655 | 436.1792 | 437.0593 | 493.2868 | 0.702502 | 0.484211 | 0.184087215  |
| P07356 ANXA2_MOUSE | 42.73061 | 102.2548 | 52.81744 | 100.231  | 566.3237 | 37.06319 | 494.2168 | 85.25793 | 292.5264 | 451.4622 | 0.70259  | 0.485594 | 0.654464996  |
| Q9WUU7 CATZ_MOUSE  | 617.8474 | 87.85966 | 647.4111 | 555.1492 | 40.00033 | 437.1394 | 631.4695 | 944.9775 | 504.4422 | 119.6055 | 0.703763 | 0.487978 | 0.437052638  |
| P63276 RS17_MOUSE  | 266.0545 | 131.0579 | 236.2964 | 186.151  | 348.0357 | 152.5226 | 283.5484 | 227.304  | 261.4065 | 29.22842 | 0.703763 | 0.489055 | -0.291464345 |
| Q9Z1R3 APOM_MOUSE  | 2851.612 | 3304.768 | 3240.978 | 1168.419 | 6426.895 | 2923.369 | 1955.217 | 3398.394 | 2963.473 | 2573.482 | 0.706929 | 0.492587 | -0.298788259 |

|                    |          |          |          |          |          |          |          |          |          |          |          |          |              |
|--------------------|----------|----------|----------|----------|----------|----------|----------|----------|----------|----------|----------|----------|--------------|
| P27773 PDIA3_MOUSE | 577.593  | 295.2491 | 523.8884 | 342.4163 | 109.7465 | 342.182  | 469.0496 | 610.7474 | 553.4498 | 255.2371 | 0.707155 | 0.494173 | 0.270812562  |
| Q9QZH3 PPIE_MOUSE  | 994.6492 | 804.2838 | 937.0298 | 139.5425 | 1073.706 | 645.218  | 719.0129 | 835.6509 | 354.2306 | 727.1298 | 0.707155 | 0.495408 | -0.267322392 |
| P63085 MK01_MOUSE  | 456.5087 | 42.95246 | 342.263  | 509.7168 | 41.47593 | 218.1466 | 383.1937 | 171.73   | 132.0007 | 92.13124 | 0.712701 | 0.500636 | -0.482151051 |
| Q99K85 SERC_MOUSE  | 811.9781 | 1277.859 | 1043.373 | 650.4758 | 1150.169 | 1279.649 | 1048.269 | 1411.916 | 841.1368 | 903.2169 | 0.714412 | 0.504495 | 0.152562646  |
| O89053 COR1A_MOUSE | 1041.419 | 1360.682 | 548.1251 | 460.3931 | 507.2152 | 693.3832 | 1041.709 | 1165.611 | 1569.786 | 389.0009 | 0.714412 | 0.504529 | 0.310748226  |
| Q61398 PCOC1_MOUSE | 176.3842 | 112.2138 | 250.8778 | 64.48219 | 316.5576 | 343.8629 | 213.7424 | 101.4914 | 73.09788 | 512.9998 | 0.714935 | 0.506244 | 0.435857009  |
| Q9WUM3 COR1B_MOUSE | 78.85586 | 535.6223 | 770.3777 | 542.5307 | 588.8664 | 301.7004 | 223.3121 | 398.0681 | 521.476  | 610.0278 | 0.719861 | 0.511088 | -0.29243042  |
| Q9ES46 PARVB_MOUSE | 345.6785 | 582.4399 | 168.235  | 98.57992 | 788.4052 | 480.2206 | 452.1089 | 768.4299 | 280.3087 | 514.3328 | 0.725166 | 0.51622  | 0.331340649  |
| Q99J08 S14L2_MOUSE | 108.0041 | 192.4074 | 80.08868 | 59.91864 | 386.233  | 49.43745 | 108.0071 | 144.8086 | 214.2768 | 88.72517 | 0.727479 | 0.52042  | -0.449736165 |
| Q8CG85 MAMC2_MOUSE | 513.2813 | 106.5503 | 121.8924 | 333.7389 | 378.0275 | 465.0842 | 221.5288 | 275.3028 | 210.2869 | 681.678  | 0.727479 | 0.520606 | 0.351026876  |
| Q9CYK2 QPCT_MOUSE  | 682.1121 | 211.4134 | 169.6565 | 123.3649 | 952.6053 | 120.6375 | 830.0837 | 1123.767 | 742.1477 | 169.6104 | 0.733634 | 0.526392 | 0.481294137  |
| Q91YI0 ARLY_MOUSE  | 232.8754 | 310.4509 | 791.109  | 692.8524 | 320.0814 | 277.8286 | 338.9706 | 283.1147 | 507.3082 | 526.8208 | 0.734506 | 0.529211 | -0.279425003 |
| Q9D6Y7 MSRA_MOUSE  | 904.1365 | 864.6754 | 365.4933 | 165.5369 | 443.3295 | 271.8546 | 607.3986 | 466.8443 | 1019.092 | 1077.472 | 0.734506 | 0.529785 | 0.32767943   |
| Q9JK53 PRELP_MOUSE | 1030.1   | 1061.191 | 970.9244 | 963.9567 | 1177.647 | 890.7421 | 1097.313 | 1243.052 | 910.7932 | 758.4536 | 0.739034 | 0.534443 | -0.086685045 |
| P09041 PGK2_MOUSE  | 1663.362 | 645.4603 | 2320.929 | 1840.857 | 60.34222 | 1256.486 | 1397.747 | 1283.234 | 1005.88  | 48.33555 | 0.743781 | 0.540666 | -0.387766745 |
| P29699 FETUA_MOUSE | 29140.48 | 3417.776 | 42491.72 | 31067.42 | 351.5122 | 13878.82 | 9223.05  | 14478.31 | 36210.18 | 184.4178 | 0.743781 | 0.540677 | -0.525326769 |
| Q68FD5 CLH1_MOUSE  | 356.8487 | 565.7664 | 284.7314 | 199.2007 | 920.6053 | 451.3475 | 746.9891 | 372.7041 | 578.2176 | 638.1639 | 0.744524 | 0.543404 | 0.260365766  |
| O09173 HGD_MOUSE   | 362.7422 | 499.2927 | 364.8474 | 323.6641 | 438.1809 | 299.4521 | 869.614  | 263.3992 | 378.9034 | 541.79   | 0.744524 | 0.544022 | 0.242753171  |
| P70694 DHB5_MOUSE  | 891.7668 | 1122.623 | 362.9277 | 498.4788 | 1142.436 | 138.1319 | 1229.916 | 834.3454 | 1322.398 | 1366.987 | 0.751324 | 0.550405 | 0.283798061  |
| Q9R0G6 COMP_MOUSE  | 12459.08 | 16478.97 | 12962.38 | 12385.81 | 16405.02 | 10624.15 | 12584.07 | 14552.7  | 13117    | 15818.39 | 0.753035 | 0.554166 | -0.083924848 |
| P18242 CATD_MOUSE  | 359.1756 | 271.9804 | 600.7181 | 437.8975 | 691.467  | 407.2899 | 543.348  | 492.1595 | 183.4504 | 431.6407 | 0.753035 | 0.555953 | -0.198379057 |
| Q9WVB4 SLIT3_MOUSE | 96.70161 | 147.493  | 286.0553 | 257.264  | 295.4329 | 71.51596 | 182.2826 | 298.5409 | 268.5762 | 520.9199 | 0.753035 | 0.556907 | 0.309245441  |
| Q8CG76 ARK72_MOUSE | 121.1352 | 233.8447 | 155.8989 | 160.0333 | 56.04977 | 84.37711 | 90.29731 | 262.9716 | 460.0564 | 75.26301 | 0.753035 | 0.557331 | 0.420508788  |
| Q3TC72 FAHD2_MOUSE | 103.6489 | 73.7443  | 90.04955 | 144.3643 | 566.3323 | 59.88288 | 238.6356 | 410.7874 | 569.5283 | 104.05   | 0.756149 | 0.561117 | 0.499568331  |
| Q99J77 SIAS_MOUSE  | 649.9726 | 277.6978 | 265.6521 | 230.2339 | 152.3955 | 217.3495 | 387.7214 | 273.3825 | 408.5842 | 624.0074 | 0.756149 | 0.563842 | 0.278138379  |
| O35969 GAMT_MOUSE  | 829.5121 | 1502.5   | 142.8171 | 678.1763 | 2161.584 | 176.4535 | 1571.149 | 287.5413 | 585.5154 | 1349.817 | 0.756149 | 0.566472 | -0.420646225 |
| Q61646 HPT_MOUSE   | 2851.761 | 371.64   | 682.9418 | 710.9259 | 222.8509 | 747.394  | 1717.598 | 1931.073 | 935.6827 | 1090.183 | 0.756149 | 0.568495 | 0.407964338  |
| P24549 AL1A1_MOUSE | 471.452  | 424.8563 | 367.4972 | 254.9897 | 697.8419 | 351.4899 | 845.7133 | 486.2094 | 507.3426 | 368.1924 | 0.756149 | 0.568886 | 0.20717799   |
| Q9EPL2 CSTN1_MOUSE | 191.0787 | 136.5168 | 202.6823 | 192.8571 | 257.295  | 355.7568 | 122.8213 | 252.0439 | 138.9054 | 249.4727 | 0.756149 | 0.569402 | 0.190724073  |
| Q04857 CO6A1_MOUSE | 6879.293 | 15078.14 | 22812.77 | 4274.036 | 1744.127 | 12216.03 | 7359.999 | 8075.201 | 5663.264 | 5422.391 | 0.756149 | 0.569604 | -0.390790103 |
| Q60847 COCA1_MOUSE | 8970.67  | 709.7167 | 1971.17  | 2292.041 | 3222.779 | 9987.166 | 3302.944 | 6749.295 | 1375.245 | 2025.23  | 0.765967 | 0.578442 | 0.449379591  |
| P26040 EZRI_MOUSE  | 40.19932 | 171.9553 | 81.25188 | 48.25853 | 354.7707 | 59.49064 | 123.6739 | 67.08434 | 137.1064 | 133.0803 | 0.766568 | 0.580339 | -0.420270877 |
| P09535 IGF2_MOUSE  | 250.6609 | 146.5915 | 396.0007 | 427.9138 | 769.6992 | 427.0836 | 157.5556 | 73.97074 | 438.5356 | 506.9668 | 0.771922 | 0.585847 | -0.311621068 |
| P62270 RS18_MOUSE  | 175.59   | 72.17013 | 309.3798 | 284.1143 | 783.6591 | 61.26749 | 417.1587 | 406.2823 | 262.3765 | 83.99433 | 0.786488 | 0.599062 | -0.400438991 |

|                    |          |          |          |          |          |          |          |          |          |          |          |          |              |
|--------------------|----------|----------|----------|----------|----------|----------|----------|----------|----------|----------|----------|----------|--------------|
| P26638 SYSC_MOUSE  | 300.5929 | 340.5218 | 135.7721 | 170.959  | 637.8125 | 262.4751 | 332.565  | 287.4995 | 504.6126 | 475.2489 | 0.786488 | 0.60111  | 0.232081968  |
| Q61207 SAP_MOUSE   | 1369.992 | 552.7964 | 1097.717 | 349.5591 | 413.5618 | 892.6046 | 707.869  | 921.1566 | 463.5058 | 112.6406 | 0.786488 | 0.601345 | -0.288536466 |
| P51150 RAB7A_MOUSE | 77.32307 | 152.4837 | 87.62119 | 71.69029 | 136.7432 | 19.41103 | 72.56541 | 97.86942 | 214.6494 | 246.0699 | 0.78775  | 0.603793 | 0.307010893  |
| P09528 FRIH_MOUSE  | 1322.952 | 2411.792 | 1373.088 | 1390.061 | 2144.769 | 688.3025 | 2194.936 | 2710.642 | 1866.148 | 2287.659 | 0.78917  | 0.606368 | 0.173584438  |
| Q8VDM4 PSMD2_MOUSE | 66.16988 | 106.2289 | 30.69266 | 93.22395 | 169.4549 | 91.81585 | 118.4822 | 81.70368 | 160.3071 | 85.17163 | 0.794599 | 0.614003 | 0.206593741  |
| Q9QUM9 PSA6_MOUSE  | 542.1926 | 278.833  | 58.31311 | 119.475  | 415.5712 | 217.2208 | 181.331  | 463.807  | 329.3506 | 512.8326 | 0.794599 | 0.616075 | 0.269209448  |
| Q9WVJ9 FBLN4_MOUSE | 964.4598 | 604.9775 | 750.7067 | 360.6736 | 480.3781 | 603.6998 | 685.6031 | 865.1452 | 399.6054 | 989.4717 | 0.794599 | 0.617099 | 0.164715025  |
| Q8K182 CO8A_MOUSE  | 184.9136 | 494.4851 | 522.1144 | 138.3939 | 91.53932 | 82.88947 | 278.2909 | 834.2755 | 491.2454 | 167.7079 | 0.794599 | 0.617719 | 0.373486072  |
| O35945 AL1A7_MOUSE | 66.06685 | 100.711  | 136.5194 | 120.1872 | 374.8831 | 80.85035 | 251.3406 | 146.299  | 69.88658 | 82.02689 | 0.794599 | 0.618021 | -0.340777623 |
| Q9D6F9 TBB4A_MOUSE | 130.8225 | 382.6068 | 116.1809 | 99.14111 | 426.7255 | 27.55751 | 344.7811 | 97.78529 | 235.3556 | 216.6958 | 0.794731 | 0.619621 | -0.32537528  |
| P16045 LEG1_MOUSE  | 206.6746 | 212.3124 | 89.19556 | 232.12   | 317.966  | 48.20138 | 420.1898 | 190.8321 | 305.5105 | 277.1237 | 0.798331 | 0.623931 | 0.230793777  |
| Q9DCD0 6PGD_MOUSE  | 2148.148 | 1571.149 | 1394.909 | 1226.642 | 1547.991 | 1276.475 | 973.6722 | 1714.895 | 1943.365 | 1397.348 | 0.798344 | 0.625445 | -0.110779389 |
| P30115 GSTA3_MOUSE | 2031.222 | 1260.003 | 2899.984 | 1860.556 | 21.44885 | 1330.558 | 1564.781 | 1637.433 | 1520.794 | 764.1343 | 0.799677 | 0.630755 | -0.243857985 |
| Q9D0R2 SYTC_MOUSE  | 70.48895 | 152.0269 | 67.9707  | 96.0137  | 291.0547 | 78.67074 | 177.2508 | 115.9579 | 118.8728 | 343.1114 | 0.799677 | 0.631557 | 0.299473491  |
| Q8VC12 HUTU_MOUSE  | 779.188  | 306.2077 | 134.3963 | 486.522  | 330.2544 | 554.528  | 156.6213 | 273.7385 | 263.7183 | 463.723  | 0.799677 | 0.632485 | -0.250180268 |
| Q99MY8 ASH1L_MOUSE | 1032.966 | 410.4004 | 86.38422 | 1234.831 | 25.82666 | 857.9609 | 531.3362 | 568.4657 | 76.21558 | 30.31565 | 0.799677 | 0.632513 | -0.434827583 |
| Q9D8W5 PSD12_MOUSE | 32.18086 | 176.3455 | 78.44003 | 39.10269 | 159.342  | 26.56954 | 98.45202 | 85.75349 | 135.5835 | 51.55309 | 0.801292 | 0.635299 | -0.28675923  |
| P49182 HEP2_MOUSE  | 14057.89 | 3880.494 | 10242.19 | 9178.138 | 2774.096 | 12574.39 | 10192.59 | 12943.44 | 8563.334 | 2683.841 | 0.801394 | 0.638631 | 0.226576372  |
| P34884 MIF_MOUSE   | 120.3183 | 417.5397 | 107.2793 | 123.7865 | 258.4743 | 35.50489 | 236.5087 | 75.66856 | 284.5904 | 728.7991 | 0.801394 | 0.639475 | 0.405747779  |
| E9Q557 DESP_MOUSE  | 391.1226 | 64.94065 | 573.5682 | 424.7693 | 28.79025 | 220.3995 | 757.936  | 284.5077 | 518.7526 | 89.18703 | 0.801394 | 0.639908 | 0.334937766  |
| Q9R0Y5 KAD1_MOUSE  | 351.1143 | 383.6786 | 2006.821 | 967.7307 | 261.9696 | 108.1814 | 1347.408 | 565.1083 | 638.6354 | 392.4467 | 0.808731 | 0.647289 | -0.379965703 |
| Q93092 TALDO_MOUSE | 89.06595 | 428.6236 | 124.8211 | 79.0692  | 312.3225 | 111.8811 | 226.2484 | 91.71471 | 261.9557 | 166.1396 | 0.820605 | 0.659509 | -0.269151944 |
| Q8BTM8 FLNA_MOUSE  | 1124.046 | 1325.637 | 1211.515 | 1210.25  | 2615.476 | 1319.472 | 1110.283 | 1437.833 | 1331.147 | 1618.099 | 0.820605 | 0.659884 | -0.135271235 |
| O88207 CO5A1_MOUSE | 2706.868 | 5487.85  | 932.0818 | 1460.373 | 3973.371 | 5791.93  | 2259.498 | 1933.711 | 737.9292 | 1116.455 | 0.828354 | 0.668458 | -0.298453293 |
| Q91X83 METK1_MOUSE | 963.8245 | 1146.254 | 702.7596 | 626.6357 | 740.6868 | 506.8199 | 907.4453 | 1129.824 | 867.4651 | 1093.356 | 0.828354 | 0.669235 | 0.10794027   |
| P13020 GELS_MOUSE  | 17864.21 | 18875.04 | 18453.76 | 14867.28 | 24046.95 | 12563.52 | 18932    | 18528.3  | 20373.57 | 19271.78 | 0.830432 | 0.672588 | -0.069693531 |
| P62774 MTPN_MOUSE  | 49.41192 | 194.7542 | 93.42713 | 47.92712 | 522.7813 | 68.213   | 227.5766 | 156.8669 | 347.3005 | 335.1319 | 0.830432 | 0.674042 | 0.321561797  |
| P62334 PRS10_MOUSE | 86.38647 | 103.5446 | 59.95004 | 114.6486 | 160.8375 | 75.17709 | 82.88739 | 111.1743 | 206.4697 | 111.75   | 0.832252 | 0.677516 | 0.16116038   |
| Q8CF98 COL10_MOUSE | 143.2483 | 436.4622 | 101.7605 | 140.2424 | 423.3004 | 134.7612 | 808.8641 | 285.1054 | 260.8319 | 76.8102  | 0.832252 | 0.678654 | 0.331265892  |
| P16301 LCAT_MOUSE  | 1869.671 | 81.84074 | 1435.787 | 1215.651 | 12.3608  | 1271.996 | 1226.955 | 930.9293 | 188.1255 | 45.30183 | 0.838208 | 0.686069 | -0.333280354 |
| P63017 HSP7C_MOUSE | 3417.288 | 3180.343 | 2039.528 | 2106.079 | 3758.179 | 2407.142 | 3804.527 | 3026.671 | 2439.521 | 1818.419 | 0.838208 | 0.689604 | -0.103631991 |
| Q8BH61 F13A_MOUSE  | 870.2071 | 1539.714 | 1303.369 | 842.9371 | 1664.505 | 706.6497 | 1464.834 | 1095.121 | 1315.326 | 1203.284 | 0.838208 | 0.691651 | -0.104713663 |
| P14206 RSSA_MOUSE  | 302.0505 | 361.4533 | 137.472  | 134.3028 | 470.2022 | 301.5255 | 266.5659 | 199.2213 | 403.6664 | 389.6593 | 0.838208 | 0.692049 | 0.151072546  |
| Q07235 GDN_MOUSE   | 286.0232 | 413.9813 | 337.7935 | 507.2879 | 439.1289 | 163.2005 | 247.0312 | 808.2684 | 632.6554 | 391.9073 | 0.838208 | 0.692436 | 0.176901735  |

|                    |          |          |          |          |          |          |          |          |          |          |          |          |              |
|--------------------|----------|----------|----------|----------|----------|----------|----------|----------|----------|----------|----------|----------|--------------|
| P49722 PSA2_MOUSE  | 202.0488 | 575.6376 | 64.35314 | 115.2831 | 325.1946 | 102.8246 | 308.4713 | 381.7877 | 199.7711 | 66.4593  | 0.838208 | 0.692982 | -0.275847855 |
| Q9R045 ANGL2_MOUSE | 729.9133 | 763.3608 | 439.157  | 381.3244 | 1188.56  | 466.3576 | 965.3862 | 700.4888 | 846.7388 | 863.6255 | 0.839532 | 0.695658 | 0.133772726  |
| Q9CQV8 1433B_MOUSE | 103.6785 | 106.7297 | 204.1402 | 184.9567 | 246.5113 | 55.96432 | 151.903  | 129.9303 | 114.1143 | 599.1844 | 0.842019 | 0.699304 | 0.313137672  |
| Q7TSV4 PGM2_MOUSE  | 18579.23 | 318.6566 | 16249.44 | 17446.24 | 103.2524 | 12981.77 | 12167.72 | 16311.69 | 126.0916 | 306.5103 | 0.84239  | 0.701198 | -0.330979438 |
| Q8K0E8 FIBB_MOUSE  | 1814.969 | 1490.872 | 1958.009 | 1404.806 | 1153.101 | 941.1567 | 2007.444 | 2127.708 | 1203.669 | 966.9562 | 0.846608 | 0.706937 | -0.110122003 |
| Q61781 K1C14_MOUSE | 326.7487 | 71.87858 | 59.40849 | 62.89012 | 66.73196 | 225.4973 | 290.5428 | 61.03355 | 64.57271 | 82.92131 | 0.846608 | 0.708451 | 0.302144068  |
| P63330 PP2AA_MOUSE | 7535.911 | 44.46043 | 4804.248 | 41.05407 | 325.0519 | 4370.325 | 2431     | 2171.802 | 332.455  | 113.4849 | 0.846608 | 0.709493 | -0.436923237 |
| Q9QXY6 EHD3_MOUSE  | 829.0393 | 280.2676 | 547.1594 | 315.1483 | 314.8089 | 385.4473 | 620.4484 | 894.8331 | 399.5092 | 276.9887 | 0.846915 | 0.711423 | 0.172726797  |
| P80314 TCPB_MOUSE  | 49.51893 | 341.3947 | 105.6852 | 66.51634 | 232.3915 | 55.40177 | 184.6362 | 44.86125 | 216.3861 | 168.6998 | 0.846915 | 0.71294  | -0.247744801 |
| O35103 OMD_MOUSE   | 2165.9   | 590.3223 | 842.9406 | 773.526  | 110.7725 | 709.6721 | 1434.247 | 1908.931 | 905.7044 | 321.5675 | 0.862098 | 0.727345 | 0.235958125  |
| Q8BV57 SRCRL_MOUSE | 5140.837 | 1316.291 | 1165.968 | 2845.531 | 2031.708 | 5427.265 | 2622.102 | 567.2686 | 642.2277 | 1168.929 | 0.863406 | 0.731343 | -0.261533016 |
| Q11011 PSA_MOUSE   | 106.2115 | 187.3539 | 143.8515 | 155.1763 | 204.0898 | 180.587  | 108.041  | 53.93627 | 171.4287 | 222.1342 | 0.863406 | 0.73252  | -0.114050796 |
| Q9CWK8 SNX2_MOUSE  | 111.166  | 237.4525 | 111.0366 | 124.1694 | 135.8968 | 79.16591 | 231.9981 | 100.4975 | 216.9005 | 159.0472 | 0.863406 | 0.734213 | 0.130041645  |
| P63073 IF4E_MOUSE  | 411.9398 | 225.618  | 110.9263 | 372.9171 | 301.929  | 200.3136 | 691.6315 | 192.3273 | 32.58424 | 79.78883 | 0.863406 | 0.734952 | -0.250274584 |
| Q8BHN3 GANAB_MOUSE | 95.83087 | 261.6734 | 130.9931 | 65.71314 | 657.4077 | 94.84952 | 486.5062 | 201.853  | 207.7308 | 445.2869 | 0.872079 | 0.743977 | 0.245348107  |
| P07141 CSF1_MOUSE  | 23558.27 | 29110.62 | 18885.01 | 18948.32 | 30054.13 | 21499.23 | 25688.79 | 23497.91 | 28193.35 | 26109.51 | 0.873767 | 0.747062 | 0.052090944  |
| P80317 TCPZ_MOUSE  | 354.8864 | 253.711  | 120.5601 | 47.65664 | 837.9986 | 225.2512 | 128.8628 | 720.1578 | 167.0631 | 74.12424 | 0.875711 | 0.750387 | -0.295800422 |
| A2AQ07 TBB1_MOUSE  | 3168.133 | 2270.854 | 688.0122 | 678.7813 | 3075.744 | 1852.001 | 1451.882 | 1770.979 | 2917.172 | 2920.908 | 0.875711 | 0.752023 | 0.143234496  |
| P27808 MGAT1_MOUSE | 177.2721 | 55.75157 | 59.37043 | 73.99211 | 68.2815  | 51.09213 | 134.9491 | 127.9224 | 27.51015 | 40.97291 | 0.876343 | 0.754216 | -0.184654337 |
| Q60605 MYL6_MOUSE  | 326.0411 | 285.2119 | 185.1328 | 230.2161 | 416.7857 | 177.0602 | 321.0169 | 265.4518 | 466.6535 | 310.7608 | 0.881267 | 0.760113 | 0.094355071  |
| O88947 FA10_MOUSE  | 8496.868 | 1748.683 | 2660.301 | 2474.857 | 682.1081 | 6110.718 | 3568.663 | 5315.339 | 2080.501 | 1536.374 | 0.881888 | 0.76231  | 0.212476741  |
| Q99JW4 LIMS1_MOUSE | 211.4145 | 649.5851 | 432.3411 | 301.8896 | 441.1489 | 82.05537 | 757.2556 | 441.4055 | 385.9201 | 575.8242 | 0.88475  | 0.76645  | 0.139076534  |
| P05064 ALDOA_MOUSE | 36.85473 | 330.5867 | 52.85713 | 144.1196 | 490.936  | 81.88979 | 298.9744 | 117.2541 | 83.37396 | 319.2723 | 0.886901 | 0.769984 | -0.228505322 |
| Q3UM45 PP1R7_MOUSE | 328.0578 | 1302.285 | 108.8088 | 157.072  | 298.4801 | 118.4701 | 310.667  | 1046.685 | 184.0491 | 121.0068 | 0.891286 | 0.776319 | -0.301437465 |
| O88544 CSN4_MOUSE  | 59.63727 | 887.2481 | 71.06869 | 53.85497 | 29.23986 | 65.38365 | 125.2498 | 320.7314 | 295.8138 | 34.70296 | 0.891286 | 0.777148 | -0.387189164 |
| Q61704 ITIH3_MOUSE | 25479.88 | 18211.11 | 21189.98 | 19015.39 | 8722.383 | 24118.21 | 24602.08 | 19442.4  | 16857.54 | 12720.99 | 0.892758 | 0.780291 | 0.077662958  |
| P80316 TCPE_MOUSE  | 35.79833 | 113.7972 | 210.7103 | 285.8044 | 294.4564 | 82.8852  | 70.24537 | 282.3514 | 437.3597 | 187.6038 | 0.892758 | 0.784093 | 0.173068442  |
| P97447 FHL1_MOUSE  | 510.4998 | 638.3881 | 511.794  | 351.3272 | 388.8489 | 237.8096 | 311.9919 | 404.7342 | 509.7127 | 783.8324 | 0.892758 | 0.784304 | -0.0948562   |
| Q70E20 SNED1_MOUSE | 393.3661 | 96.83526 | 99.03783 | 1722.266 | 87.12466 | 552.9452 | 272.6038 | 1734.287 | 252.6204 | 190.9229 | 0.892758 | 0.785156 | 0.324376062  |
| P51655 GPC4_MOUSE  | 479.9289 | 253.55   | 328.1331 | 271.1968 | 434.7885 | 315.6573 | 193.1507 | 220.0928 | 452.5123 | 486.0543 | 0.901176 | 0.794257 | -0.084131151 |
| Q01339 APOH_MOUSE  | 236.1733 | 900.8694 | 75.33914 | 106.088  | 367.2652 | 294.1184 | 216.2222 | 360.0609 | 304.6107 | 307.883  | 0.901429 | 0.796177 | -0.184961112 |
| Q8C4U3 SFRP1_MOUSE | 242.317  | 142.3771 | 349.643  | 247.6897 | 414.6658 | 633.1618 | 302.3755 | 274.1248 | 140.9645 | 174.7796 | 0.904036 | 0.801844 | 0.127178931  |
| Q8CG03 PDE5A_MOUSE | 376.192  | 206.4748 | 54.33012 | 58.65496 | 162.467  | 91.24761 | 218.2549 | 116.1977 | 72.79944 | 269.2301 | 0.904036 | 0.803736 | -0.160579164 |
| Q60787 LCP2_MOUSE  | 724.5854 | 241.5864 | 65.49848 | 65.13747 | 163.3515 | 81.33066 | 920.566  | 131.1516 | 201.8294 | 178.9488 | 0.904036 | 0.804556 | 0.264593808  |

|                    |          |          |          |          |          |          |          |          |          |          |          |          |              |
|--------------------|----------|----------|----------|----------|----------|----------|----------|----------|----------|----------|----------|----------|--------------|
| Q8BMS2 SPON2_MOUSE | 1439.917 | 1969.92  | 1461.604 | 1219.264 | 1856.703 | 250.4836 | 2050.475 | 1673.389 | 1784.581 | 1750.224 | 0.904036 | 0.807793 | -0.081834204 |
| Q61553 FSCN1_MOUSE | 61.67123 | 176.014  | 187.2525 | 159.7342 | 589.4135 | 75.74553 | 195.9854 | 228.1418 | 215.3242 | 334.0364 | 0.904036 | 0.809591 | -0.162201821 |
| Q9QZ88 VPS29_MOUSE | 155.0068 | 291.8885 | 153.253  | 110.6029 | 254.37   | 109.1409 | 383.5501 | 253.4225 | 110.5846 | 184.5797 | 0.904036 | 0.811126 | 0.109572825  |
| P47962 RL5_MOUSE   | 114.343  | 403.7631 | 66.00145 | 125.7104 | 364.2495 | 132.0031 | 371.0554 | 207.3341 | 191.3107 | 272.2408 | 0.904036 | 0.811542 | 0.128279003  |
| Q99P72 RTN4_MOUSE  | 3040.137 | 57.82307 | 582.1108 | 362.2726 | 121.811  | 1385.496 | 651.2703 | 2179.738 | 588.0001 | 167.7295 | 0.904036 | 0.813502 | 0.255870707  |
| Q8BTZ7 GMPPB_MOUSE | 51.3684  | 136.7467 | 153.5259 | 121.8163 | 306.8486 | 38.59658 | 154.7879 | 202.6437 | 183.5709 | 258.2367 | 0.904036 | 0.814048 | 0.121235775  |
| Q9R1B9 SLIT2_MOUSE | 273.9586 | 205.6159 | 398.5854 | 432.4103 | 161.7195 | 705.8983 | 229.2393 | 246.8056 | 164.1979 | 259.925  | 0.904036 | 0.815505 | 0.125469789  |
| Q91WK0 LRRF2_MOUSE | 4183.063 | 1131.955 | 2667.191 | 3435.464 | 107.5558 | 4185.298 | 2616.313 | 1998.27  | 723.0901 | 835.6012 | 0.904936 | 0.818021 | -0.153970321 |
| Q02053 UBA1_MOUSE  | 1098.78  | 586.1157 | 537.7037 | 539.0163 | 787.4407 | 698.7252 | 588.8846 | 424.278  | 857.5995 | 823.2208 | 0.905485 | 0.820951 | -0.064998066 |
| Q11136 PEPD_MOUSE  | 47.57546 | 317.6448 | 205.6659 | 160.9079 | 578.7355 | 66.20109 | 334.705  | 240.6671 | 189.2787 | 359.1404 | 0.905485 | 0.823465 | -0.13919762  |
| Q91ZX7 LRP1_MOUSE  | 1710.827 | 2418.069 | 1607.534 | 1608.284 | 3593.288 | 818.4482 | 1631.645 | 2652.585 | 2806.1   | 3761.143 | 0.905485 | 0.823633 | 0.0934455    |
| O35598 ADA10_MOUSE | 345.2037 | 280.1059 | 302.0378 | 242.0822 | 208.2429 | 556.838  | 69.40853 | 172.037  | 167.6146 | 526.616  | 0.911112 | 0.830467 | 0.115511596  |
| Q3THS6 METK2_MOUSE | 773.4974 | 1026.363 | 580.0004 | 454.2781 | 2233.459 | 797.4382 | 726.114  | 617.0368 | 894.774  | 1635.997 | 0.912742 | 0.834733 | -0.117459281 |
| Q06806 TIE1_MOUSE  | 333.7559 | 529.5711 | 188.1098 | 431.2936 | 212.4156 | 235.9583 | 483.4146 | 686.024  | 94.82925 | 324.6183 | 0.912742 | 0.835391 | 0.106364016  |
| P68254 1433T_MOUSE | 184.5564 | 297.188  | 198.3103 | 196.3792 | 194.7352 | 141.4607 | 139.7666 | 203.8103 | 517.0077 | 148.9366 | 0.913786 | 0.838067 | 0.103678742  |
| P11983 TCPA_MOUSE  | 683.3412 | 104.6046 | 415.8734 | 302.1513 | 373.7896 | 82.09107 | 372.6074 | 216.8754 | 448.5645 | 625.0386 | 0.918329 | 0.843963 | -0.107175156 |
| P45376 ALDR_MOUSE  | 2173.187 | 1276.209 | 1843.018 | 1445.999 | 432.0519 | 2237.432 | 1735.223 | 2131.69  | 1261.893 | 248.1576 | 0.927203 | 0.853954 | 0.086662601  |
| P97927 LAMA4_MOUSE | 8348.659 | 1720.221 | 10552.02 | 7858.11  | 3114.569 | 7377.881 | 5547.027 | 6980.089 | 4109.686 | 5930.534 | 0.927203 | 0.856664 | -0.077305571 |
| Q61035 HARS1_MOUSE | 531.3991 | 93.18952 | 266.186  | 594.194  | 278.9536 | 139.1843 | 801.5326 | 295.9674 | 169.8893 | 216.9237 | 0.927203 | 0.859004 | -0.119681927 |
| P12960 CNTN1_MOUSE | 362.3019 | 673.2632 | 383.6262 | 555.3092 | 921.4265 | 304.4073 | 537.8475 | 793.4128 | 366.6638 | 762.3228 | 0.927203 | 0.859103 | -0.066926161 |
| P50247 SAHH_MOUSE  | 5186.935 | 13926.21 | 7375.905 | 6467.643 | 16939.31 | 5185.069 | 10737.5  | 9528.926 | 10658.58 | 11495.79 | 0.929206 | 0.862709 | -0.067784748 |
| P97333 NRP1_MOUSE  | 95.84695 | 281.9822 | 93.93262 | 101.2478 | 207.223  | 88.67114 | 191.8308 | 214.7666 | 95.00535 | 150.7363 | 0.931675 | 0.867831 | -0.074410712 |
| P28271 ACOC_MOUSE  | 1901.155 | 2560.465 | 1466.603 | 1095.208 | 2943.916 | 1486.754 | 2292.944 | 2479.987 | 2222.438 | 1814.261 | 0.931675 | 0.86851  | 0.046856112  |
| Q9Z2U0 PSA7_MOUSE  | 44.62115 | 303.7903 | 89.63602 | 33.55676 | 279.604  | 19.14427 | 120.1299 | 312.4946 | 126.9702 | 236.9162 | 0.933725 | 0.87218  | 0.11874631   |
| P00375 DYR_MOUSE   | 1256.656 | 541.6334 | 1867.214 | 1920.423 | 416.5399 | 1096.188 | 807.288  | 1851.022 | 1292.011 | 657.6447 | 0.939284 | 0.879142 | -0.073542597 |
| Q9CPV4 GLOD4_MOUSE | 207.8163 | 729.4782 | 642.4351 | 732.1603 | 357.2622 | 342.8464 | 710.4617 | 379.1943 | 552.9188 | 785.4759 | 0.945032 | 0.886301 | 0.053971525  |
| O55135 IF6_MOUSE   | 49.69152 | 227.5628 | 548.1141 | 344.5102 | 471.7242 | 41.73288 | 680.1854 | 217.2136 | 360.137  | 246.4839 | 0.950245 | 0.89298  | -0.086795368 |
| O35474 EDIL3_MOUSE | 382.3071 | 248.0301 | 121.2509 | 169.6046 | 620.6836 | 409.8446 | 309.6208 | 304.5471 | 136.5956 | 315.1229 | 0.953674 | 0.897998 | -0.063257138 |
| P50396 GDIA_MOUSE  | 600.0552 | 1632.919 | 134.8409 | 186.051  | 1021.955 | 23.395   | 1373.018 | 1517.802 | 257.4517 | 126.4149 | 0.953814 | 0.899926 | -0.116647595 |
| Q9D358 PPAC_MOUSE  | 486.1205 | 545.9828 | 514.1722 | 363.0923 | 442.4548 | 255.0536 | 442.2769 | 512.184  | 509.9256 | 679.4048 | 0.956111 | 0.903894 | 0.028560664  |
| Q9JHK5 PLEK_MOUSE  | 1487.526 | 1716.665 | 498.8062 | 393.4085 | 4340.366 | 245.2326 | 2584.146 | 886.0636 | 2333.926 | 2907.67  | 0.959556 | 0.908958 | 0.086330712  |
| P04186 CFAB_MOUSE  | 3521.021 | 4705.479 | 4529.392 | 2585.137 | 6841.713 | 2999.951 | 3744.986 | 7342.989 | 4511.334 | 4156.126 | 0.961236 | 0.914045 | 0.03677037   |
| A2A8L5 PTPRF_MOUSE | 103.0065 | 321.393  | 82.16142 | 90.17568 | 131.7744 | 75.37028 | 122.5014 | 182.2657 | 228.504  | 90.35176 | 0.961236 | 0.914349 | -0.059672631 |
| P20918 PLMN_MOUSE  | 1773.272 | 882.4789 | 1918.89  | 1637.554 | 562.8083 | 1411.607 | 1329.51  | 2488.201 | 1452.35  | 329.4335 | 0.961236 | 0.91598  | 0.049419355  |

|                    |          |          |          |          |          |          |          |          |          |          |          |          |              |
|--------------------|----------|----------|----------|----------|----------|----------|----------|----------|----------|----------|----------|----------|--------------|
| P97315 CSRP1_MOUSE | 302.6768 | 456.6977 | 136.7212 | 275.2716 | 695.5306 | 81.43949 | 454.1407 | 155.4001 | 557.3468 | 692.4677 | 0.965972 | 0.924369 | 0.05600454   |
| O35516 NOTC2_MOUSE | 222.8107 | 332.112  | 292.3545 | 345.9605 | 135.537  | 106.9475 | 312.3265 | 188.1851 | 284.002  | 406.2658 | 0.965972 | 0.925863 | -0.034109625 |
| P26041 MOES_MOUSE  | 947.0826 | 111.9196 | 1354.529 | 882.3395 | 194.0249 | 1068.356 | 474.9579 | 874.5936 | 743.5265 | 197.7424 | 0.965972 | 0.928439 | -0.055076184 |
| Q8K2Z4 CND1_MOUSE  | 94.54433 | 432.3071 | 157.9901 | 49.3481  | 1046.54  | 525.3694 | 369.7917 | 237.2814 | 371.133  | 187.6656 | 0.965972 | 0.928834 | -0.074386322 |
| O35206 COFA1_MOUSE | 3324.801 | 1329.29  | 2068.439 | 1251.79  | 788.3539 | 3356.572 | 1638.459 | 1379.826 | 1083.206 | 1576.642 | 0.965972 | 0.929589 | 0.044106485  |
| Q3UQU0 BRD9_MOUSE  | 52012.43 | 5423.94  | 39937.64 | 35689.33 | 844.2922 | 49914.39 | 33103.96 | 31817.16 | 13600.32 | 108.7366 | 0.971274 | 0.937349 | -0.058969462 |
| Q8K354 CBR3_MOUSE  | 698.2646 | 628.1223 | 383.4235 | 251.0681 | 65.31623 | 441.4873 | 510.1583 | 300.3997 | 505.1688 | 318.4077 | 0.971274 | 0.939217 | 0.034770762  |
| Q6GQT1 A2MG_MOUSE  | 268247.5 | 184124.2 | 258802.3 | 214556   | 184502.9 | 329236.5 | 214327.8 | 253177   | 142909.8 | 184350   | 0.971274 | 0.941615 | 0.017781202  |
| P97427 DPYL1_MOUSE | 256.1451 | 568.0281 | 364.6483 | 276.2218 | 225.3312 | 139.3363 | 653.3897 | 534.0817 | 140.7815 | 176.3632 | 0.971274 | 0.943185 | -0.040174332 |
| Q9DB60 PXL2B_MOUSE | 357.8061 | 385.429  | 260.3262 | 131.227  | 296.1053 | 248.9048 | 331.521  | 320.5456 | 203.3583 | 308.0929 | 0.971274 | 0.943836 | -0.018744798 |
| O09159 MA2B1_MOUSE | 53.4785  | 396.436  | 52.65231 | 100.0692 | 382.6708 | 38.6837  | 104.7373 | 356.5026 | 167.8203 | 285.6648 | 0.973621 | 0.949762 | -0.047478193 |
| P70428 EXT2_MOUSE  | 639.664  | 284.576  | 385.3689 | 486.6229 | 434.2189 | 95.50345 | 563.1129 | 339.9975 | 720.584  | 473.7415 | 0.973621 | 0.952074 | -0.02446935  |
| P06151 LDHA_MOUSE  | 2889.335 | 2333.584 | 3436.235 | 2306.411 | 2339.117 | 1547.996 | 3050.713 | 3562.157 | 2548.365 | 2477.912 | 0.973621 | 0.954829 | -0.012801997 |
| P12367 KAP2_MOUSE  | 86.6442  | 420.0451 | 80.23463 | 49.81311 | 370.3891 | 61.36294 | 176.8914 | 112.2958 | 250.5237 | 378.3335 | 0.973621 | 0.955911 | -0.040263458 |
| P63101 1433Z_MOUSE | 210.8949 | 547.6257 | 544.8929 | 314.2587 | 440.8283 | 192.5219 | 346.0518 | 469.1107 | 454.5313 | 570.1835 | 0.973621 | 0.95615  | -0.018410021 |
| O54754 AOXA_MOUSE  | 465.0003 | 364.894  | 283.696  | 295.8533 | 600.9944 | 215.3046 | 325.6563 | 651.642  | 288.7938 | 557.4667 | 0.973621 | 0.957119 | 0.0202552    |
| Q9JII6 AK1A1_MOUSE | 1288.625 | 1791.878 | 2598.131 | 1002.437 | 1185.759 | 883.5679 | 1841.913 | 1367.337 | 2070.415 | 1778.136 | 0.982418 | 0.967617 | 0.013604979  |
| Q8CHR6 DPYD_MOUSE  | 277.3526 | 240.8629 | 419.8674 | 329.3097 | 249.6695 | 210.7999 | 259.2384 | 262.3651 | 276.9144 | 519.0783 | 0.985469 | 0.972478 | 0.010738353  |
| P25444 RS2_MOUSE   | 570.6448 | 241.8805 | 278.4063 | 83.22873 | 479.3209 | 92.65116 | 463.1811 | 647.0516 | 179.8107 | 290.8006 | 0.986069 | 0.976606 | 0.017357678  |
| Q9R1P1 PSB3_MOUSE  | 272.7922 | 444.9659 | 143.8666 | 353.1934 | 110.76   | 170.7243 | 64.71792 | 130.3813 | 55.88826 | 878.6143 | 0.986069 | 0.976784 | -0.027748216 |
| P70296 PEBP1_MOUSE | 194.1479 | 342.4004 | 449.0421 | 436.0719 | 473.0766 | 32.26336 | 686.8336 | 481.8691 | 545.6836 | 134.1362 | 0.990391 | 0.984042 | -0.010663519 |
| Q91V92 ACLY_MOUSE  | 1502.118 | 374.6268 | 217.4239 | 215.8597 | 323.628  | 1251.585 | 509.8904 | 466.7234 | 316.5126 | 64.87083 | 0.990391 | 0.98821  | -0.01324802  |
| Q62422 OSTF1_MOUSE | 27.66009 | 163.3338 | 239.585  | 92.83733 | 204.3719 | 29.79639 | 104.9789 | 303.6566 | 146.9852 | 137.9163 | 0.990391 | 0.988303 | -0.008857773 |
| Q62009 POSTN_MOUSE | 866.3704 | 2639.303 | 1105.04  | 1103.615 | 1284.825 | 1533.253 | 2114.113 | 900.9756 | 1129.17  | 1293.541 | 0.990391 | 0.988526 | -0.005804059 |
| O08999 LTBP2_MOUSE | 397.4477 | 282.7097 | 582.4589 | 157.9437 | 210.6101 | 219.1111 | 556.3533 | 233.8409 | 394.5045 | 230.855  | 0.994608 | 0.994608 | 0.003087667  |
