# Supplementary material
Source: PubMed Central journal article supplement (PMC9492804)
Supplement: NIHMS1791440-supplement-tS3C.pdf [file NIHMS1791440-supplement-tS3C.pdf]

## Up and Down Regulated Proteins

Proteins with a p value < 0.05 and a fold change greater than 1.5 or less than -1.5

### Up-Regulated Proteins

| Uniprot Accession Number | Log <sub>2</sub> (Fold Change) |
|--------------------------|--------------------------------|
| Q2PZL6 FAT4_MOUSE        | 4.59                           |
| P56501 UCP3_MOUSE        | 2.08                           |
| P58022 LOXL2_MOUSE       | 1.92                           |
| G5E8P1 BRD1_MOUSE        | 1.89                           |
| Q05793 PGBM_MOUSE        | 1.82                           |
| P41731 CD63_MOUSE        | 1.79                           |
| Q9R1P4 PSA1_MOUSE        | 1.77                           |
| O35074 PTGIS_MOUSE       | 1.61                           |
| Q8R5L3 VPS39_MOUSE       | 1.57                           |
| P62806 H4_MOUSE          | 1.54                           |
| P62702 RS4X_MOUSE        | 1.34                           |
| P07091 S10A4_MOUSE       | 1.30                           |
| Q62059 CSPG2_MOUSE       | 1.30                           |
| P10107 ANXA1_MOUSE       | 1.29                           |
| Q8K482 EMIL2_MOUSE       | 1.26                           |
| Q80YX1 TENA_MOUSE        | 1.23                           |
| P01831 THY1_MOUSE        | 1.16                           |
| P23591 FCL_MOUSE         | 1.13                           |
| Q8CIZ8 VWF_MOUSE         | 1.09                           |
| P48759 PTX3_MOUSE        | 1.09                           |
| P50516 VATA_MOUSE        | 1.08                           |
| Q60675 LAMA2_MOUSE       | 1.02                           |
| P10493 NID1_MOUSE        | 0.95                           |
| P21956 MFGM_MOUSE        | 0.94                           |
| Q9DCT1 AKCL2_MOUSE       | 0.93                           |
| P02468 LAMC1_MOUSE       | 0.79                           |
| Q811B3 ATS12_MOUSE       | 0.75                           |
| Q78JT3 3HAO_MOUSE        | 0.74                           |
| O08992 SDCB1_MOUSE       | 0.73                           |
| P29788 VTNC_MOUSE        | 0.65                           |

### Down-Regulated Proteins

| Uniprot Accession Number | Log <sub>2</sub> (Fold Change) |
|--------------------------|--------------------------------|
| E9Q414 APOB_MOUSE        | -2.64                          |
| Q32NZ6 TMC5_MOUSE        | -2.63                          |
| P49429 HPPD_MOUSE        | -2.31                          |
| Q8JZK9 HMCS1_MOUSE       | -2.30                          |
| P00687 AMY1_MOUSE        | -2.26                          |
| Q9R182 ANGL3_MOUSE       | -2.12                          |
| P10126 EF1A1_MOUSE       | -1.88                          |
| Q8BM72 HSP13_MOUSE       | -1.75                          |
| P35700 PRDX1_MOUSE       | -1.74                          |
| Q8VC97 BUP1_MOUSE        | -1.65                          |
| O70435 PSA3_MOUSE        | -1.63                          |
| Q8R1A4 DOCK7_MOUSE       | -1.61                          |
| P70663 SPRL1_MOUSE       | -1.52                          |
| P61971 NTF2_MOUSE        | -1.52                          |
| Q08879 FBLN1_MOUSE       | -1.49                          |
| Q66JQ7 KNL1_MOUSE        | -1.49                          |
| A6X935 ITIH4_MOUSE       | -1.35                          |
| P22777 PAI1_MOUSE        | -1.34                          |
| P62962 PROF1_MOUSE       | -1.31                          |
| Q640N1 AEBP1_MOUSE       | -1.30                          |
| Q920E5 FPPS_MOUSE        | -1.27                          |
| P47856 GFPT1_MOUSE       | -1.26                          |
| P16858 G3P_MOUSE         | -1.24                          |
| Q99J16 RAP1B_MOUSE       | -1.16                          |
| P63001 RAC1_MOUSE        | -1.15                          |
| P19221 THRB_MOUSE        | -1.15                          |
| Q00623 APOA1_MOUSE       | -1.13                          |
| P97298 PEDF_MOUSE        | -1.12                          |
| Q8CI94 PYGB_MOUSE        | -1.11                          |
| Q9R0N0 GALK1_MOUSE       | -1.11                          |
| O88844 IDHC_MOUSE        | -1.10                          |
| P01029 CO4B_MOUSE        | -1.09                          |
| P16125 LDHB_MOUSE        | -1.08                          |
| P06745 G6PI_MOUSE        | -1.07                          |
| Q99JY9 ARP3_MOUSE        | -1.05                          |
| P48758 CBR1_MOUSE        | -1.00                          |
| Q8VCM7 FIBG_MOUSE        | -0.99                          |
| O08710 THYG_MOUSE        | -0.97                          |
| Q8R0Y6 AL1L1_MOUSE       | -0.92                          |
| Q76MZ3 2AAA_MOUSE        | -0.89                          |

|                    |       |
|--------------------|-------|
| P17742 PPIA_MOUSE  | -0.88 |
| Q62000 MIME_MOUSE  | -0.87 |
| P07901 HS90A_MOUSE | -0.86 |
| Q9CVB6 ARPC2_MOUSE | -0.79 |
| P07724 ALBU_MOUSE  | -0.79 |
| P21550 ENOB_MOUSE  | -0.78 |
| P99024 TBB5_MOUSE  | -0.74 |
| Q3U962 CO5A2_MOUSE | -0.74 |
