# Supplementary material
Source: PubMed Central journal article supplement (PMC9492804)
Supplement: NIHMS1791440-supplement-tS4.pdf [file NIHMS1791440-supplement-tS4.pdf]

| <b>Gene ID (Alias)</b>                                          | <b>TaqMan Assay ID</b> |
|-----------------------------------------------------------------|------------------------|
| Metastasis Associated Lung Adenocarcinoma Transcript 1 (Malat1) | Mm01227912_s1          |
| Nuclear Respiratory Factor 1 (Nrf1)                             | Mm01135606_m1          |
| Nuclear Factor, Erythroid 2 Like 2 (Nrf2)                       | Mm00477784_m1          |
| Heme Oxygenase 1 (Hmox1)                                        | Mm00516005_m1          |
| Catalase (Cat)                                                  | Mm00437992_m1          |
| Superoxide Dismutase 1 (Sod1)                                   | Mm01344233_g1          |
| Superoxide Dismutase 2 (Sod2)                                   | Mm01313000_m1          |
| NAD(P)H Quinone Dehydrogenase 1 (Nqo1)                          | Mm01253561_m1          |
| Glutathione Peroxidase 1 (Gpx1)                                 | Mm00656767_g1          |
| Glutathione Peroxidase 3 (Gpx3)                                 | Mm00492427_m1          |
| Glutathione Peroxidase 4 (Gpx4)                                 | Mm00515041_m1          |
| Glutathione S-Transferase Pi 1 (Gstp1)                          | Mm04213618_gH          |
| Glyceraldehyde-3-Phosphate Dehydrogenase (Gapdh)                | Mm99999915_g1          |

**Supplementary Table 4.** TaqMan Primer List for Gene Expression Analysis.
